# Supplementary material for: Prevalence of G6PD deficiency in selected populations from two previously high malaria endemic areas of Sri Lanka
Source: PubMed Central journal article supplement (PMC5289554; doi:10.1371/journal.pone.0171208), 2017-02-02
Supplement: pone.0171208.s001.pdf [file pone.0171208.s001.pdf]

| Plate 1      |       |       |           |       |           |           |     |     |
|--------------|-------|-------|-----------|-------|-----------|-----------|-----|-----|
| Sample       | 450nm | 630nm | 450-630nm | %     | Colour O1 | Colour O2 | Age | Sex |
| Blank        | 0     | 0     | 0         |       | No        | No        |     |     |
| Inactivated  | 0.2   | 0.118 | 0.082     |       | No        | No        |     |     |
| Sub negative | 0.022 | 0.013 | 0.009     |       | No        | No        |     |     |
| 100%         | 0.535 | 0.082 | 0.453     |       | 5         | 5         |     |     |
| 60%          | 0.421 | 0.082 | 0.339     |       | 4         | 4         |     |     |
| 30%          | 0.329 | 0.083 | 0.246     |       | 3         | 3         |     |     |
| 10%          | 0.197 | 0.054 | 0.143     |       | 2         | 2         |     |     |
| A1           | 0.265 | 0.078 | 0.187     | 18.2  | 3         | 3         | 41  | F   |
| A2           | 0.387 | 0.154 | 0.233     | 31.7  | 3         | 3         | 2   | M   |
| A3           | 0.556 | 0.099 | 0.457     | 97.5  | 4         | 4         | 28  | F   |
| A4           | 0.587 | 0.104 | 0.483     | 105.2 | 4         | 4         | 37  | F   |
| A5           | 0.469 | 0.137 | 0.332     | 60.8  | 4         | 4         | 37  | F   |
| A6           | 0.466 | 0.177 | 0.289     | 48.2  | 3         | 3         | 60  | F   |
| A7           | 0.429 | 0.129 | 0.3       | 51.4  | 3         | 3         | 30  | M   |
| A8           | 0.272 | 0.101 | 0.171     | 13.5  | 3         | 3         | 60  | F   |
| A9           | 0.39  | 0.104 | 0.286     | 47.3  | 3         | 3         | 55  | F   |
| A10          | 0.393 | 0.098 | 0.295     | 49.9  | 3         | 3         | 75  | F   |
| A11          | 0.686 | 0.154 | 0.532     | 119.6 | 5         | 5         | 45  | M   |
| A12          | 0.409 | 0.112 | 0.297     | 50.5  | 3         | 3         | 54  | F   |
| A13          | 0.203 | 0.014 | 0.189     | 18.8  | 3         | 3         | 53  | F   |
| A14          | 0.36  | 0.109 | 0.251     | 37.0  | 3         | 3         | 46  | F   |
| A15          | 0.568 | 0.262 | 0.306     | 53.2  | 3         | 3         | 39  | M   |
| A16          | 0.99  | 0.316 | 0.674     | 161.3 | 5         | 5         | 35  | F   |
| A17          | 0.317 | 0.096 | 0.221     | 28.2  | 3         | 3         | 63  | F   |
| A18          | 0.623 | 0.164 | 0.459     | 98.1  | 4         | 4         | 59  | F   |
| A19          | 0.452 | 0.051 | 0.401     | 81.1  | 4         | 4         | 76  | F   |
| A20          | 0.524 | 0.07  | 0.454     | 96.7  | 4         | 4         | 75  | F   |
| A21          | 0.396 | 0.027 | 0.369     | 71.7  | 4         | 4         | 45  | F   |
| A22          | 0.369 | 0.113 | 0.256     | 38.5  | 3         | 3         | 58  | M   |
| A23          | 0.711 | 0.185 | 0.526     | 117.8 | 4         | 4         | 74  | F   |
| A24          | 0.291 | 0.079 | 0.212     | 25.5  | 3         | 3         | 64  | F   |
| A25          | 0.907 | 0.138 | 0.769     | 189.2 | 6         | 6         | 21  | F   |
| A26          | 0.509 | 0.146 | 0.363     | 69.9  | 4         | 4         | 55  | F   |
| A27          | 0.786 | 0.521 | 0.265     | 41.1  | 3         | 3         | 52  | M   |
| A28          | 0.672 | 0.132 | 0.54      | 121.9 | 5         | 5         | 50  | F   |
| A29          | 0.891 | 0.546 | 0.345     | 64.6  | 4         | 4         | 4   | F   |
| A30          | 0.367 | 0.07  | 0.297     | 50.5  | 3         | 3         | 43  | M   |
| A31          | 0.434 | 0.136 | 0.298     | 50.8  | 3         | 3         | 43  | F   |
| A32          | 0.369 | 0.051 | 0.318     | 56.7  | 3         | 3         | 38  | F   |
| A33          | 0.399 | 0.067 | 0.332     | 60.8  | 4         | 4         | 66  | F   |
| A34          | 0.29  | 0.115 | 0.175     | 14.7  | 3         | 3         | 46  | M   |
| A35          | 0.493 | 0.077 | 0.416     | 85.5  | 5         | 5         | 49  | M   |
| A36          | 0.227 | 0.056 | 0.171     | 13.5  | 3         | 3         | 69  | F   |
| A37          | 0.358 | 0.058 | 0.3       | 51.4  | 3         | 3         | 56  | F   |
| A38          | 0.346 | 0.093 | 0.253     | 37.6  | 3         | 3         | 37  | F   |
| A39          | 0.281 | 0.059 | 0.222     | 28.5  | 3         | 3         | 38  | F   |
| A40          | 0.335 | 0.053 | 0.282     | 46.1  | 3         | 3         | 63  | F   |
| A41          | 0.393 | 0.073 | 0.32      | 57.3  | 3         | 3         | 52  | F   |
| A42          | 0.412 | 0.131 | 0.281     | 45.8  | 3         | 3         | 11m | M   |
| A43          | 0.181 | 0.052 | 0.129     | 1.1   | 2         | 2         | 62  | M   |
| A44          | 0.274 | 0.076 | 0.198     | 21.4  | 3         | 3         | 45  | F   |
| A45          | 0.265 | 0.057 | 0.208     | 24.4  | 3         | 3         | 67  | F   |
| A46          | 0.454 | 0.108 | 0.346     | 64.9  | 4         | 4         | 50  | F   |
| A47          | 0.242 | 0.067 | 0.175     | 14.7  | 3         | 3         | 77  | M   |
| A48          | 0.259 | 0.055 | 0.204     | 23.2  | 3         | 3         | 38  | M   |
| A49          | 0.456 | 0.069 | 0.387     | 77.0  | 4         | 4         | 35  | F   |
| A50          | 0.387 | 0.119 | 0.268     | 42.0  | 3         | 3         | 51  | F   |
| A51          | 0.302 | 0.081 | 0.221     | 28.2  | 3         | 3         | 52  | F   |
| A52          | 0.376 | 0.046 | 0.33      | 60.2  | 4         | 4         | 40  | M   |
| A53          | 0.397 | 0.032 | 0.365     | 70.5  | 4         | 4         | 50  | F   |
| A54          | 0.381 | 0.065 | 0.316     | 56.1  | 4         | 4         | 20  | F   |
| A55          | 0.192 | 0.036 | 0.156     | 9.1   | 2         | 2         | 67  | F   |
| A56          | 0.753 | 0.055 | 0.698     | 168.4 | 6         | 6         | 37  | F   |
| A57          | 0.618 | 0.08  | 0.538     | 121.3 | 5         | 5         | 33  | F   |
| A58          | 0.506 | 0.125 | 0.381     | 75.2  | 4         | 4         | 25  | M   |
| A59          | 0.424 | 0.083 | 0.341     | 63.4  | 4         | 4         | 76  | F   |

|                |              |              |                  |          |                  |                  |            |            |
|----------------|--------------|--------------|------------------|----------|------------------|------------------|------------|------------|
| A60            | 0.412        | 0.087        | 0.325            | 58.7     | 3                | 3                | 69         | F          |
| A61            | 0.414        | 0.083        | 0.331            | 60.5     | 4                | 4                | 65         | F          |
| A62            | 0.411        | 0.12         | 0.291            | 48.8     | 3                | 3                | 55         | M          |
| A63            | 0.316        | 0.093        | 0.223            | 28.8     | 3                | 3                | 65         | F          |
| A64            | 0.353        | 0.129        | 0.224            | 29.1     | 3                | 3                | 60         | F          |
| A65            | 0.254        | 0.085        | 0.169            | 12.9     | 3                | 3                | 58         | F          |
| A66            | 0.385        | 0.102        | 0.283            | 46.4     | 3                | 3                | 47         | F          |
| A67            | 0.29         | 0.071        | 0.219            | 27.6     | 3                | 3                | 61         | F          |
| A68            | 0.407        | 0.094        | 0.313            | 55.2     | 3                | 3                | 49         | F          |
| A69            | 0.741        | 0.062        | 0.679            | 162.8    | 6                | 6                | 47         | M          |
| A70            | 0.275        | 0.09         | 0.185            | 17.6     | 3                | 3                | 2\12       | M          |
| A71            | 0.434        | 0.139        | 0.295            | 49.9     | 3                | 3                | 68         | F          |
| A72            | 0.239        | 0.041        | 0.198            | 21.4     | 3                | 3                | 26         | F          |
| A73            | 0.448        | 0.116        | 0.332            | 60.8     | 4                | 4                | 4          | F          |
| A74            | 0.692        | 0.102        | 0.59             | 136.6    | 4                | 4                | 46         | F          |
| A75            | 0.483        | 0.225        | 0.258            | 39.1     | 3                | 3                | 66         | M          |
| A76            | 0.493        | 0.084        | 0.409            | 83.4     | 5                | 5                | 23         | F          |
| A77            | 0.416        | 0.176        | 0.24             | 33.8     | 3                | 3                | 2y6m       | F          |
| A78            | 0.263        | 0.1          | 0.163            | 11.1     | 3                | 3                | 64         | F          |
| A79            | 0.77         | 0.109        | 0.661            | 157.5    | 5                | 5                | 33         | F          |
| A80            | 0.54         | 0.298        | 0.242            | 34.4     | 3                | 3                | 63         | F          |
| A81            | 0.638        | 0.155        | 0.483            | 105.2    | 5                | 5                | 60         | F          |
| A82            | 0.506        | 0.101        | 0.405            | 82.3     | 5                | 5                | 66         | F          |
| A83            | 0.291        | 0.076        | 0.215            | 26.4     | 3                | 3                | 71         | M          |
| A84            | 0.199        | 0.073        | 0.126            | 0.3      | 1                | 1                | 49         | F          |
| A85            | 0.196        | 0.068        | 0.128            | 0.9      | 1                | 1                | 11         | M          |
| A86            | 0.461        | 0.07         | 0.391            | 78.1     | 4                | 4                | 21         | F          |
| A87            | 0.411        | 0.111        | 0.3              | 51.4     | 3                | 3                | 10         | F          |
|                |              |              |                  |          |                  |                  |            |            |
| <b>Plate 2</b> |              |              |                  |          |                  |                  |            |            |
| <b>Sample</b>  | <b>450nm</b> | <b>630nm</b> | <b>450-630nm</b> | <b>%</b> | <b>Colour O1</b> | <b>Colour O2</b> | <b>Age</b> | <b>Sex</b> |
| Blank          | 0            | 0            | 0                |          | No               | No               |            |            |
| Inactivated    | 0.293        | 0.108        | 0.185            |          | No               | No               |            |            |
| sub negative   | 0.004        | 0            | 0.004            |          | No               | No               |            |            |
| 100%           | 0.588        | 0.083        | 0.505            |          | 5                | 5                |            |            |
| 60%            | 0.437        | 0.084        | 0.353            |          | 4                | 4                |            |            |
| 30%            | 0.335        | 0.076        | 0.259            |          | 3                | 3                |            |            |
| 10%            | 0.247        | 0.08         | 0.167            |          | 2                | 2                |            |            |
| A88            | 0.346        | 0.169        | 0.177            | 11.0     | 3                | 3                | 47         | F          |
| A89            | 0.795        | 0.1          | 0.695            | 151.3    | 5                | 5                | 48         | M          |
| A90            | 0.53         | 0.172        | 0.358            | 60.0     | 4                | 4                | 65         | M          |
| A91            | 0.353        | 0.017        | 0.336            | 54.1     | 4                | 4                | 66         | F          |
| A92            | 0.283        | 0.088        | 0.195            | 15.7     | 3                | 3                | 48         | F          |
| A93            | 1.061        | 0.307        | 0.754            | 167.3    | 6                | 6                | 56         | F          |
| A94            | 0.346        | 0.053        | 0.293            | 42.4     | 3                | 3                | 46         | F          |
| A95            | 0.343        | 0.108        | 0.235            | 26.7     | 3                | 3                | 36         | F          |
| A96            | 0.454        | 0.175        | 0.279            | 38.6     | 3                | 3                | 1          | F          |
| A97            | 0.277        | 0.062        | 0.215            | 21.3     | 3                | 3                | 19         | F          |
| A98            | 0.674        | 0.373        | 0.301            | 44.6     | 3                | 3                | 35         | M          |
| A99            | 0.462        | 0.118        | 0.344            | 56.2     | 3                | 3                | 32         | F          |
| A100           | 0.763        | 0.077        | 0.686            | 148.9    | 5                | 5                | 55         | F          |
| A101           | 0.315        | 0.096        | 0.219            | 22.4     | 3                | 3                | 59         | F          |
| A102           | 0.81         | 0.052        | 0.758            | 168.4    | 6                | 6                | 32         | F          |
| A103           | 0.32         | 0.052        | 0.268            | 35.6     | 3                | 3                | 22         | F          |
| A104           | 0.556        | 0.116        | 0.44             | 82.2     | 4                | 4                | 11         | F          |
| A105           | 0.579        | 0.142        | 0.437            | 81.4     | 4                | 4                | 48         | M          |
| A106           | 0.352        | 0.092        | 0.26             | 33.5     | 3                | 3                | 45         | F          |
| A107           | 0.428        | 0.049        | 0.379            | 65.7     | 4                | 4                | 2          | F          |
| A108           | 0.609        | 0.031        | 0.578            | 119.6    | 5                | 5                | 22         | M          |
| A109           | 0.561        | 0.054        | 0.507            | 100.4    | 4                | 4                | 17         | M          |
| A110           | 0.399        | 0.031        | 0.368            | 62.7     | 4                | 4                | 58         | F          |
| A111           | 0.512        | 0.068        | 0.444            | 83.3     | 4                | 4                | 17         | F          |
| A112           | 0.486        | 0.132        | 0.354            | 58.9     | 4                | 4                | 40         | M          |
| A113           | 0.35         | 0.076        | 0.274            | 37.3     | 3                | 3                | 48         | F          |
| A114           | 0.712        | 0.109        | 0.603            | 126.4    | 5                | 5                | 57         | M          |
| A115           | 0.452        | 0.052        | 0.4              | 71.4     | 3                | 4                | 53         | M          |
| A116           | 0.279        | 0.08         | 0.199            | 16.9     | 3                | 3                | 50         | F          |
| A117           | 0.732        | 0.447        | 0.285            | 40.2     | 3                | 3                | 51         | F          |

|                |              |              |                  |          |                  |                  |            |            |
|----------------|--------------|--------------|------------------|----------|------------------|------------------|------------|------------|
| A118           | 0.505        | 0.046        | 0.459            | 87.4     | 4                | 4                | 52         | F          |
| A119           | 0.316        | 0.075        | 0.241            | 28.3     | 3                | 3                | 22         | F          |
| A120           | 0.422        | 0.131        | 0.291            | 41.9     | 3                | 3                | 53         | F          |
| A121           | 0.376        | 0.074        | 0.302            | 44.9     | 3                | 3                | 22         | M          |
| A122           | 0.437        | 0.093        | 0.344            | 56.2     | 3                | 3                | 48         | F          |
| A123           | 0.394        | 0.063        | 0.331            | 52.7     | 3                | 3                | 35         | F          |
| A124           | 0.55         | 0.103        | 0.447            | 84.1     | 4                | 4                | 32         | M          |
| A125           | 0.691        | 0.428        | 0.263            | 34.3     | 3                | 3                | 4          | F          |
| A126           | 0.218        | 0.06         | 0.158            | 5.8      | 2                | 2                | 67         | F          |
| A127           | 0.322        | 0.089        | 0.233            | 26.2     | 3                | 3                | 35         | F          |
| A128           | 0.582        | 0.145        | 0.437            | 81.4     | 4                | 4                | 6          | F          |
| A129           | 0.302        | 0.114        | 0.188            | 14.0     | 3                | 3                | 30         | F          |
| A130           | 0.545        | 0.08         | 0.465            | 89.0     | 4                | 4                | 23         | M          |
| A131           | 0.508        | 0.102        | 0.406            | 73.0     | 4                | 4                | 36         | F          |
| A132           | 0.289        | 0.062        | 0.227            | 24.5     | 3                | 3                | 43         | F          |
| A133           | 0.393        | 0.058        | 0.335            | 53.8     | 3                | 3                | 73         | F          |
| A134           | 0.773        | 0.053        | 0.72             | 158.1    | 6                | 6                | 68         | F          |
| A135           | 0.334        | 0.092        | 0.242            | 28.6     | 3                | 3                | 61         | M          |
| A136           | 0.541        | 0.214        | 0.327            | 51.6     | 4                | 4                | 62         | M          |
| A137           | 0.595        | 0.312        | 0.283            | 39.7     | 3                | 3                | 48         | F          |
| A138           | 0.537        | 0.105        | 0.432            | 80.1     | 4                | 4                | 14         | F          |
| A139           | 0.202        | 0.038        | 0.164            | 7.5      | 2                | 2                | 48         | F          |
| A140           | 0.17         | 0.029        | 0.141            | 1.2      | 2                | 2                | 64         | M          |
| A141           | 0.39         | 0.037        | 0.353            | 58.7     | 4                | 4                | 57         | F          |
| A142           | 0.158        | 0.019        | 0.139            | 0.7      | 1                | 1                | 51         | M          |
| A143           | 0.738        | 0.349        | 0.389            | 68.4     | 4                | 4                | 37         | M          |
| A144           | 0.527        | 0.211        | 0.316            | 48.6     | 4                | 4                | 45         | F          |
| A145           | 0.378        | 0.091        | 0.287            | 40.8     | 3                | 3                | 53         | F          |
| A146           | 0.609        | 0.205        | 0.404            | 72.5     | 4                | 4                | 48         | M          |
| A147           | 0.496        | 0.21         | 0.286            | 40.5     | 3                | 3                | 39         | F          |
| A148           | 0.357        | 0.074        | 0.283            | 39.7     | 3                | 3                | 34         | F          |
| A149           | 0.437        | 0.086        | 0.351            | 58.1     | 4                | 4                | 29         | M          |
| A150           | 0.677        | 0.062        | 0.615            | 129.7    | 5                | 5                | 32         | F          |
| A151           | 0.422        | 0.14         | 0.282            | 39.4     | 3                | 3                | 35         | F          |
| A152           | 0.266        | 0.089        | 0.177            | 11.0     | 3                | 3                | 60         | M          |
| A153           | 0.328        | 0.117        | 0.211            | 20.2     | 3                | 3                | 66         | F          |
| A154           | 0.47         | 0.162        | 0.308            | 46.5     | 3                | 3                | 56         | F          |
| A155           | 0.433        | 0.092        | 0.341            | 55.4     | 4                | 4                | 57         | M          |
| A156           | 0.42         | 0.154        | 0.266            | 35.1     | 3                | 3                | 61         | F          |
| A157           | 0.76         | 0.08         | 0.68             | 147.3    | 5                | 5                | 32         | F          |
| A158           | 0.961        | 0.361        | 0.6              | 125.6    | 4                | 5                | 4          | M          |
| A159           | 0.589        | 0.304        | 0.285            | 40.2     | 3                | 3                | 42         | F          |
| A160           | 0.561        | 0.157        | 0.404            | 72.5     | 4                | 4                | 65         | F          |
| A161           | 0.365        | 0.109        | 0.256            | 32.4     | 3                | 3                | 32         | M          |
| A162           | 0.972        | 0.273        | 0.699            | 152.4    | 5                | 5                | 1y6m       | F          |
| A163           | 0.379        | 0.127        | 0.252            | 31.3     | 3                | 3                | 60         | F          |
| A164           | 0.674        | 0.1          | 0.574            | 118.6    | 4                | 4                | 2y3m       | M          |
| A165           | 0.861        | 0.1          | 0.761            | 169.2    | 6                | 6                | 42         | F          |
| A166           | 1.01         | 0.205        | 0.805            | 181.2    | 5                | 6                | 36         | F          |
| A167           | 0.239        | 0.077        | 0.162            | 6.9      | 2                | 2                | 70         | F          |
| A168           | 0.864        | 0.232        | 0.632            | 134.3    | 5                | 5                | 34         | M          |
| A169           | 0.412        | 0.122        | 0.29             | 41.6     | 3                | 3                | 52         | F          |
| A170           | 0.334        | 0.131        | 0.203            | 18.0     | 3                | 3                | 66         | F          |
| A171           | 0.258        | 0.081        | 0.177            | 11.0     | 3                | 3                | 9\12       | F          |
| A172           | 0.365        | 0.089        | 0.276            | 37.8     | 3                | 3                | 16         | F          |
| A173           | 0.21         | 0.058        | 0.152            | 4.2      | 2                | 2                | 33         | F          |
| A174           | 0.256        | 0.079        | 0.177            | 11.0     | 3                | 3                | 60         | F          |
|                |              |              |                  |          |                  |                  |            |            |
| <b>Plate 3</b> |              |              |                  |          |                  |                  |            |            |
| <b>Sample</b>  | <b>450nm</b> | <b>630nm</b> | <b>450-630nm</b> | <b>%</b> | <b>Colour O1</b> | <b>Colour O2</b> | <b>Age</b> | <b>Sex</b> |
| Blank          | 0            | 0            | 0                |          | No               | No               |            |            |
| Inactivated    | 0.246        | 0.118        | 0.128            |          | No               | No               |            |            |
| Sub negative   | 0.006        | 0.003        | 0.003            |          | No               | No               |            |            |
| 100%           | 0.609        | 0.087        | 0.522            |          | 5                | 5                |            |            |
| 60%            | 0.522        | 0.096        | 0.426            |          | 4                | 4                |            |            |
| 30%            | 0.325        | 0.012        | 0.313            |          | 3                | 3                |            |            |
| 10%            | 0.285        | 0.043        | 0.242            |          | 2                | 2                |            |            |
| A175           | 0.482        | 0.118        | 0.364            | 46.3     | 4                | 4                | 23         | F          |

|                |              |              |                  |          |                  |                  |            |            |
|----------------|--------------|--------------|------------------|----------|------------------|------------------|------------|------------|
| A176           | 0.411        | 0.086        | 0.325            | 34.0     | 3                | 3                | 33         | F          |
| A177           | 0.241        | 0.004        | 0.237            | 6.3      | 2                | 2                | 43         | M          |
| A178           | 0.273        | 0.043        | 0.23             | 4.1      | 2                | 2                | 34\12      | F          |
| A179           | 0.735        | 0.213        | 0.522            | 96.1     | 5                | 5                | 9          | M          |
| A180           | 0.325        | 0.071        | 0.254            | 11.6     | 3                | 3                | 21         | M          |
| A181           | 0.337        | 0.021        | 0.316            | 31.2     | 3                | 3                | 33         | F          |
| A182           | 0.371        | 0.032        | 0.339            | 38.4     | 3                | 3                | 45         | F          |
| A183           | 0.353        | 0.031        | 0.322            | 33.1     | 3                | 3                | 57         | M          |
| A184           | 0.229        | 0.01         | 0.219            | 0.6      | 1                | 1                | 73         | F          |
| A185           | 0.342        | 0.019        | 0.323            | 33.4     | 3                | 3                | 38         | F          |
| A186           | 0.591        | 0.074        | 0.517            | 94.5     | 5                | 5                | 63         | F          |
| A187           | 0.415        | 0.079        | 0.336            | 37.5     | 4                | 4                | 55         | M          |
| A188           | 0.302        | 0.026        | 0.276            | 18.6     | 3                | 3                | 42         | F          |
|                |              |              |                  |          |                  |                  |            |            |
| <b>Plate 4</b> |              |              |                  |          |                  |                  |            |            |
| <b>Sample</b>  | <b>450nm</b> | <b>630nm</b> | <b>450-630nm</b> | <b>%</b> | <b>Colour O1</b> | <b>Colour O2</b> | <b>Age</b> | <b>Sex</b> |
| Blank          | 0            | 0            | 0                |          | No               | No               |            |            |
| Inactivated    | 0.139        | 0.089        | 0.05             |          | No               | No               |            |            |
| Sub negative   | 0.777        | 0.684        | 0.093            |          | No               | No               |            |            |
| 100%           | 0.592        | 0.066        | 0.526            |          | 5                | 5                |            |            |
| 60%            | 0.29         | 0.066        | 0.224            |          | 3                | 3                |            |            |
| 30%            | 0.208        | 0.087        | 0.121            |          | 2                | 2                |            |            |
| 10%            | 0.163        | 0.074        | 0.089            |          | 2                | 2                |            |            |
| A189           | 0.334        | 0.056        | 0.278            | 57.2     | 3                | 3                | 9months    | F          |
| A190           | 0.32         | 0.088        | 0.232            | 48.5     | 3                | 3                | 16         | F          |
| A191           | 0.353        | 0.052        | 0.301            | 61.6     | 4                | 4                | 67         | F          |
| A192           | 0.361        | 0.079        | 0.282            | 58.0     | 3                | 3                | 8          | F          |
| A193           | 0.808        | 0.529        | 0.279            | 57.4     | 5                | 5                | 28         | F          |
| A194           | 0.275        | 0.086        | 0.189            | 40.3     | 3                | 3                | 61         | F          |
| A195           | 0.498        | 0.078        | 0.42             | 84.1     | 4                | 4                | 34         | F          |
| A196           | 0.849        | 0.488        | 0.361            | 72.9     | 6                | 6                | 40         | F          |
| A197           | 0.437        | 0.07         | 0.367            | 74.1     | 4                | 4                | 41         | F          |
| A198           | 1.103        | 0.295        | 0.808            | 157.7    | 6                | 6                | 44         | M          |
| A199           | 0.259        | 0.122        | 0.137            | 30.5     | 3                | 3                | 58         | F          |
| A200           | 0.231        | 0.067        | 0.164            | 35.6     | 3                | 3                | 45         | M          |
| A201           | 0.242        | 0.035        | 0.207            | 43.7     | 3                | 4                | 46         | F          |
| A202           | 0.23         | 0.042        | 0.188            | 40.1     | 3                | 3                | 29         | F          |
| A203           | 0.222        | 0.067        | 0.155            | 33.9     | 3                | 3                | 4months    | F          |
| A204           | 0.261        | 0.055        | 0.206            | 43.6     | 4                | 4                | 60         | F          |
| A205           | 0.275        | 0.09         | 0.185            | 39.6     | 3                | 3                | 2          | F          |
| A206           | 0.353        | 0.031        | 0.322            | 65.5     | 4                | 4                | 6          | F          |
| A207           | 0.295        | 0.13         | 0.165            | 35.8     | 3                | 3                | yrn 10mnth | F          |
| A208           | 0.561        | 0.072        | 0.489            | 97.2     | 6                | 6                | 35         | M          |
| A209           | 0.339        | 0.073        | 0.266            | 54.9     | 3                | 3                | 31         | F          |
| A210           | 0.392        | 0.121        | 0.271            | 55.9     | 3                | 3                | 54         | F          |
| A211           | 0.939        | 0.074        | 0.865            | 168.5    | 7                | 7                | 60         | M          |
| A212           | 0.486        | 0.094        | 0.392            | 78.8     | 4                | 4                | 58         | F          |
| A213           | 0.361        | 0.037        | 0.324            | 65.9     | 3                | 4                | 17         | F          |
| A214           | 0.336        | 0.056        | 0.28             | 57.6     | 3                | 3                | 36         | F          |
| A215           | 0.461        | 0.047        | 0.414            | 83.0     | 4                | 4                | 40         | F          |
| A216           | 0.278        | 0.038        | 0.24             | 50.0     | 3                | 2                | 4          | F          |
| A217           | 0.478        | 0.076        | 0.402            | 80.7     | 4                | 4                | 33         | F          |
| A218           | 0.322        | 0.076        | 0.246            | 51.1     | 3                | 4                | 66         | M          |
| A219           | 0.444        | 0.051        | 0.393            | 79.0     | 4                | 4                | 4          | F          |
| A220           | 0.361        | 0.078        | 0.283            | 58.2     | 5                | 5                | 63         | M          |
| A221           | 0.315        | 0.028        | 0.287            | 58.9     | 5                | 5                | 50         | F          |
| A222           | 0.337        | 0.075        | 0.262            | 54.2     | 4                | 4                | 53         | F          |
| A223           | 0.186        | 0.079        | 0.107            | 24.8     | 2                | 2                | 23         | M          |
| A224           | 0.327        | 0.06         | 0.267            | 55.1     | 3                | 3                | 42         | F          |
| A225           | 0.327        | 0.149        | 0.178            | 38.2     | 3                | 3                | 42         | F          |
| A226           | 0.345        | 0.117        | 0.228            | 47.7     | 3                | 3                | 68         | M          |
| A227           | 0.558        | 0.084        | 0.474            | 94.4     | 4                | 4                | 30         | F          |
| A228           | 0.417        | 0.054        | 0.363            | 73.3     | 4                | 4                | 21         | M          |
| A229           | 1.07         | 0.419        | 0.651            | 127.9    | 6                | 6                | 38         | M          |
| A230           | 0.467        | 0.068        | 0.399            | 80.1     | 4                | 4                | 35         | F          |
| A231           | 0.217        | 0.052        | 0.165            | 35.8     | 2                | 2                | 45         | F          |
| A232           | 0.455        | 0.076        | 0.379            | 76.3     | 4                | 4                | 42         | F          |
| A233           | 0.489        | 0.085        | 0.404            | 81.1     | 5                | 5                | 2          | M          |

|                |              |              |                  |          |                  |                  |            |            |
|----------------|--------------|--------------|------------------|----------|------------------|------------------|------------|------------|
| A234           | 0.547        | 0.38         | 0.167            | 36.2     | 5                | 5                | 37         | M          |
| A235           | 0.489        | 0.103        | 0.386            | 77.7     | 5                | 5                | 59         | M          |
| A236           | 0.523        | 0.042        | 0.481            | 95.7     | 5                | 5                | 49         | F          |
| A237           | 0.364        | 0.075        | 0.289            | 59.3     | 3                | 3                | 49         | F          |
| A238           | 0.187        | 0.071        | 0.116            | 26.5     | 2                | 2                | 48         | F          |
| A239           | 0.336        | 0.072        | 0.264            | 54.5     | 3                | 3                | 54         | F          |
| A240           | 0.468        | 0.095        | 0.373            | 75.2     | 4                | 4                | 51         | F          |
| A241           | 0.578        | 0.089        | 0.489            | 97.2     | 5                | 5                | 54         | F          |
| A242           | 0.736        | 0.07         | 0.666            | 130.8    | 6                | 6                | 50         | F          |
| A243           | 0.34         | 0.089        | 0.251            | 52.1     | 3                | 3                | 60         | F          |
| A244           | 0.285        | 0.089        | 0.196            | 41.7     | 3                | 3                | 34         | F          |
| A245           | 0.578        | 0.065        | 0.513            | 101.7    | 4                | 4                | 53         | M          |
| A246           | 0.306        | 0.069        | 0.237            | 49.4     | 3                | 3                | 53         | F          |
| A247           | 0.444        | 0.072        | 0.372            | 75.0     | 4                | 4                | 38         | F          |
| A248           | 0.616        | 0.086        | 0.53             | 105.0    | 5                | 5                | 16         | F          |
| A249           | 0.191        | 0.074        | 0.117            | 26.7     | 2                | 2                | 65         | F          |
| A250           | 0.629        | 0.094        | 0.535            | 105.9    | 5                | 5                | 43         | F          |
| A251           | 0.478        | 0.292        | 0.186            | 39.8     | 4                | 4                | 33         | F          |
| A252           | 0.348        | 0.12         | 0.228            | 47.7     | 3                | 3                | 51         | F          |
| A253           | 0.848        | 0.076        | 0.772            | 150.8    | 6                | 6                | 55         | F          |
| A254           | 0.95         | 0.064        | 0.886            | 172.5    | 7                | 7                | 28         | M          |
| A255           | 0.451        | 0.11         | 0.341            | 69.1     | 4                | 4                | 14         | M          |
| A256           | 0.552        | 0.158        | 0.394            | 79.2     | 4                | 4                | 68         | M          |
| A257           | 0.61         | 0.104        | 0.506            | 100.4    | 5                | 5                | 26         | F          |
| A258           | 0.315        | 0.109        | 0.206            | 43.6     | 3                | 3                | 60         | M          |
| A259           | 0.369        | 0.154        | 0.215            | 45.3     | 3                | 3                | 60         | M          |
| A260           | 0.337        | 0.188        | 0.149            | 32.8     | 2                | 3                | 41         | F          |
| A261           | 1.111        | 0.257        | 0.854            | 166.4    | 7                | 7                | 59         | F          |
| A262           | 0.837        | 0.63         | 0.207            | 43.7     | 6                | 6                | 50         | F          |
| A263           | 0.315        | 0.085        | 0.23             | 48.1     | 4                | 3                | 70         | F          |
| A264           | 0.511        | 0.097        | 0.414            | 83.0     | 5                | 5                | 70         | F          |
| A265           | 0.272        | 0.075        | 0.197            | 41.8     | 3                | 3                | 50         | F          |
| A266           | 0.673        | 0.104        | 0.569            | 112.4    | 5                | 5                | 25         | M          |
| A267           | 0.324        | 0.085        | 0.239            | 49.8     | 3                | 3                | 31         | F          |
| A268           | 0.556        | 0.187        | 0.369            | 74.5     | 4                | 4                | 55         | F          |
| A269           | 0.751        | 0.078        | 0.673            | 132.1    | 6                | 6                | 44         | M          |
| A270           | 0.545        | 0.067        | 0.478            | 95.1     | 5                | 5                | 30         | F          |
| A271           | 0.558        | 0.085        | 0.473            | 94.2     | 5                | 5                | 18         | M          |
| A272           | 0.292        | 0.067        | 0.225            | 47.2     | 3                | 3                | 1yr n 3m   | M          |
| <b>Plate 5</b> |              |              |                  |          |                  |                  |            |            |
| <b>Sample</b>  | <b>450nm</b> | <b>630nm</b> | <b>450-630nm</b> | <b>%</b> | <b>Colour O1</b> | <b>Colour O2</b> | <b>Age</b> | <b>Sex</b> |
| Blank          | 0            | 0            | 0                |          | No               | No               |            |            |
| Inactivated    | 0.112        | 0.081        | 0.031            |          | No               | No               |            |            |
| Sub negative   | 0.188        | 0.102        | 0.086            |          | No               | No               |            |            |
| 100%           | 0.735        | 0.109        | 0.626            |          | 6                | 6                |            |            |
| 60%            | 0.374        | 0.063        | 0.311            |          | 4                | 4                |            |            |
| 30%            | 0.25         | 0.068        | 0.182            |          | 3                | 3                |            |            |
| 10%            | 0.181        | 0.017        | 0.164            |          | 2                | 2                |            |            |
| A273           | 0.904        | 0.215        | 0.689            | 115.0    | 7                | 7                | 79         | F          |
| A274           | 0.698        | 0.245        | 0.453            | 73.4     | 6                | 6                | 63         | M          |
| A275           | 0.249        | 0.051        | 0.198            | 28.3     | 3                | 3                | 37         | F          |
| A276           | 1.193        | 0.264        | 0.929            | 157.4    | 7                | 7                | 3y6m       | M          |
| A277           | 1.368        | 0.426        | 0.942            | 159.7    | 7                | 7                | 52         | F          |
| A278           | 0.628        | 0.046        | 0.582            | 96.1     | 5                | 5                | 47         | F          |
| A279           | 0.354        | 0.108        | 0.246            | 36.8     | 3                | 3                | 60         | M          |
| A280           | 0.599        | 0.081        | 0.518            | 84.8     | 5                | 5                | 67         | F          |
| A281           | 0.554        | 0.049        | 0.505            | 82.5     | 4                | 4                | 67         | M          |
| A282           | 0.712        | 0.269        | 0.443            | 71.6     | 5                | 5                | 57         | F          |
| A283           | 0.387        | 0.057        | 0.33             | 51.6     | 3                | 3                | 52         | F          |
| A284           | 0.489        | 0.122        | 0.367            | 58.2     | 4                | 4                | 54         | F          |
| A285           | 0.266        | 0.052        | 0.214            | 31.1     | 3                | 3                | 56         | F          |
| A286           | 0.851        | 0.1          | 0.751            | 126.0    | 6                | 6                | 58         | F          |
| A287           | 0.454        | 0.1          | 0.354            | 55.9     | 4                | 4                | 47         | F          |
| A288           | 0.673        | 0.058        | 0.615            | 102.0    | 5                | 5                | 11         | F          |
| A289           | 1.228        | 0.225        | 1.003            | 170.5    | 7                | 7                | 29         | M          |
| A290           | 0.645        | 0.047        | 0.598            | 99.0     | 5                | 5                | 60         | F          |
| A291           | 0.447        | 0.05         | 0.397            | 63.5     | 4                | 4                | 61         | F          |

|                |              |              |                  |          |                  |                  |            |            |
|----------------|--------------|--------------|------------------|----------|------------------|------------------|------------|------------|
| A292           | 0.872        | 0.114        | 0.758            | 127.2    | 6                | 6                | 65         | M          |
| A293           | 0.376        | 0.018        | 0.358            | 56.6     | 4                | 4                | 28         | F          |
| A294           | 0.376        | 0.101        | 0.275            | 41.9     | 4                | 4                | 86         | M          |
| A295           | 0.567        | 0.032        | 0.535            | 87.8     | 4                | 4                | 63         | F          |
| A296           | 0.421        | 0.033        | 0.388            | 61.9     | 4                | 4                | 56         | F          |
| A297           | 0.59         | 0.138        | 0.452            | 73.2     | 5                | 5                | 33         | F          |
| A298           | 0.909        | 0.123        | 0.786            | 132.2    | 6                | 6                | 60         | F          |
| A299           | 0.785        | 0.083        | 0.702            | 117.3    | 6                | 6                | 49         | F          |
| A300           | 0.504        | 0.076        | 0.428            | 68.9     | 5                | 5                | 40         | F          |
| A301           | 0.302        | 0.082        | 0.22             | 32.2     | 3                | 3                | 55         | F          |
| A302           | 0.536        | 0.029        | 0.507            | 82.9     | 4                | 4                | 21         | F          |
| A303           | 0.452        | 0.063        | 0.389            | 62.1     | 5                | 5                | 56         | M          |
| A304           | 0.354        | 0.078        | 0.276            | 42.1     | 3                | 3                | 64         | M          |
| A305           | 0.61         | 0.059        | 0.551            | 90.7     | 4                | 4                | 49         | F          |
| A306           | 0.47         | 0.025        | 0.445            | 71.9     | 5                | 5                | 38         | F          |
| A307           | 0.368        | 0.037        | 0.331            | 51.8     | 3                | 3                | 63         | M          |
| A308           | 0.456        | 0.031        | 0.425            | 68.4     | 5                | 5                | 74         | M          |
| A309           | 0.509        | 0.024        | 0.485            | 79.0     | 4                | 4                | 62         | F          |
| A310           | 0.453        | 0.067        | 0.386            | 61.5     | 4                | 4                | 74         | F          |
| A311           | 0.484        | 0.081        | 0.403            | 64.5     | 4                | 4                | 64         | M          |
| A312           | 0.72         | 0.105        | 0.615            | 102.0    | 5                | 5                | 65         | F          |
| A313           | 0.582        | 0.032        | 0.55             | 90.5     | 5                | 5                | 65         | F          |
| A314           | 0.363        | 0.022        | 0.341            | 53.6     | 3                | 3                | 62         | F          |
| A315           | 0.259        | 0.019        | 0.24             | 35.7     | 3                | 3                | 61         | F          |
| A316           | 0.715        | 0.072        | 0.643            | 106.9    | 6                | 6                | 11         | M          |
| A317           | 0.363        | 0.055        | 0.308            | 47.7     | 3                | 3                | 60         | F          |
| A318           | 0.582        | 0.041        | 0.541            | 88.9     | 4                | 4                | 65         | F          |
| A319           | 0.259        | 0.027        | 0.232            | 34.3     | 3                | 3                | 51         | F          |
| A320           | 0.198        | 0.051        | 0.147            | 19.3     | 2                | 2                | 35         | M          |
| A321           | 0.401        | 0.079        | 0.322            | 50.2     | 3                | 3                | 13         | F          |
| A322           | 0.421        | 0.092        | 0.329            | 51.5     | 3                | 3                | 30         | F          |
| A323           | 0.655        | 0.054        | 0.601            | 99.5     | 5                | 5                | 65         | F          |
| A324           | 0.805        | 0.05         | 0.755            | 126.7    | 6                | 6                | 35         | F          |
| A325           | 0.371        | 0.031        | 0.34             | 53.4     | 3                | 3                | 59         | M          |
| A326           | 0.627        | 0.107        | 0.52             | 85.2     | 5                | 5                | 37         | M          |
| A327           | 0.34         | 0.031        | 0.309            | 47.9     | 3                | 3                | 61         | F          |
| A328           | 0.812        | 0.079        | 0.733            | 122.8    | 6                | 6                | 24         | M          |
| A329           | 0.505        | 0.2          | 0.305            | 47.2     | 5                | 5                | 5          | F          |
| A330           | 0.557        | 0.063        | 0.494            | 80.6     | 5                | 5                | 31         | F          |
| A331           | 0.716        | 0.106        | 0.61             | 101.1    | 6                | 6                | 40         | M          |
| A332           | 0.273        | 0.049        | 0.224            | 32.9     | 3                | 3                | 34         | F          |
| A333           | 0.46         | 0.028        | 0.432            | 69.6     | 4                | 4                | 66         | F          |
| A334           | 0.587        | 0.079        | 0.508            | 83.1     | 5                | 5                | 37         | F          |
| A335           | 0.238        | 0.085        | 0.153            | 20.4     | 3                | 3                | 63         | F          |
| A336           | 0.337        | 0.046        | 0.291            | 44.7     | 3                | 3                | 32         | M          |
| A337           | 0.246        | 0.041        | 0.205            | 29.6     | 3                | 3                | 72         | M          |
| A338           | 0.317        | 0.046        | 0.271            | 41.2     | 3                | 3                | 48         | M          |
| A339           | 0.432        | 0.025        | 0.407            | 65.2     | 5                | 5                | 60         | F          |
| A340           | 0.286        | 0.071        | 0.215            | 31.3     | 3                | 3                | 62         | M          |
| A341           | 0.64         | 0.054        | 0.586            | 96.8     | 5                | 5                | 59         | F          |
| A342           | 0.385        | 0.129        | 0.256            | 38.6     | 4                | 4                | 44         | F          |
| A343           | 0.643        | 0.055        | 0.588            | 97.2     | 5                | 5                | 43         | F          |
| A344           | 0.309        | 0.012        | 0.297            | 45.8     | 4                | 4                | 74         | M          |
| A345           | 0.594        | 0.042        | 0.552            | 90.8     | 5                | 5                | 57         | F          |
| A346           | 0.546        | 0.056        | 0.49             | 79.9     | 5                | 5                | 44         | F          |
| A347           | 0.391        | 0.072        | 0.319            | 49.7     | 4                | 4                | 21         | F          |
| A348           | 0.286        | 0.067        | 0.219            | 32.0     | 3                | 3                | 58         | M          |
| A349           | 0.404        | 0.07         | 0.334            | 52.3     | 4                | 4                | 52         | F          |
| A350           | 0.471        | 0.081        | 0.39             | 62.2     | 4                | 4                | 73         | M          |
| A351           | 0.313        | 0.043        | 0.27             | 41.0     | 3                | 3                | 51         | F          |
| A352           | 0.313        | 0.06         | 0.253            | 38.0     | 3                | 3                | 51         | M          |
| A353           | 0.678        | 0.038        | 0.64             | 106.4    | 5                | 5                | 65         | M          |
| A354           | 0.336        | 0.045        | 0.291            | 44.7     | 3                | 3                | 35         | F          |
| A355           | 0.566        | 0.049        | 0.517            | 84.7     | 5                | 5                | 56         | F          |
| A356           | 0.455        | 0.068        | 0.387            | 61.7     | 5                | 5                | 52         | F          |
| <b>Plate 6</b> |              |              |                  |          |                  |                  |            |            |
| <b>Sample</b>  | <b>450nm</b> | <b>630nm</b> | <b>450-630nm</b> | <b>%</b> | <b>Colour O1</b> | <b>Colour O2</b> | <b>Age</b> | <b>Sex</b> |

|              |       |       |       |       |    |    |      |   |
|--------------|-------|-------|-------|-------|----|----|------|---|
| Blank        | 0.02  | 0.02  | 0     |       | No | No |      |   |
| Inactivated  | 0.178 | 0.124 | 0.054 |       | No | No |      |   |
| Sub negative | 0.169 | 0.153 | 0.016 |       | No | No |      |   |
| 100%         | 0.636 | 0.094 | 0.542 |       | 5  | 5  |      |   |
| 60%          | 0.346 | 0.097 | 0.249 |       | 4  | 4  |      |   |
| 30%          | 0.308 | 0.128 | 0.18  |       | 3  | 3  |      |   |
| 10%          | 0.251 | 0.101 | 0.15  |       | 2  | 2  |      |   |
| A357         | 0.667 | 0.258 | 0.409 | 76.7  | 5  | 5  | 76   | M |
| A358         | 0.512 | 0.319 | 0.193 | 31.9  | 3  | 3  | 59   | F |
| A359         | 1.169 | 0.241 | 0.928 | 184.2 | 7  | 7  | 50   | M |
| A360         | 0.529 | 0.093 | 0.436 | 82.3  | 5  | 5  | 54   | F |
| A361         | 0.422 | 0.13  | 0.292 | 52.4  | 5  | 5  | 52   | M |
| A362         | 0.407 | 0.172 | 0.235 | 40.6  | 5  | 5  | 52   | F |
| A363         | 0.357 | 0.097 | 0.26  | 45.8  | 5  | 5  | 50   | M |
| A364         | 0.545 | 0.136 | 0.409 | 76.7  | 3  | 4  | 45   | M |
| A365         | 0.677 | 0.125 | 0.552 | 106.3 | 5  | 5  | 70   | M |
| A366         | 0.34  | 0.085 | 0.255 | 44.8  | 3  | 4  | 56   | F |
| A367         | 0.654 | 0.135 | 0.519 | 99.5  | 5  | 5  | 47   | M |
| A368         | 0.286 | 0.112 | 0.174 | 28.0  | 2  | 3  | 33   | M |
| A369         | 0.495 | 0.144 | 0.351 | 64.7  | 4  | 4  | 48   | F |
| A370         | 0.58  | 0.135 | 0.445 | 84.1  | 5  | 5  | 62   | M |
| A371         | 0.351 | 0.141 | 0.21  | 35.4  | 3  | 3  | 52   | F |
| A372         | 0.451 | 0.119 | 0.332 | 60.7  | 5  | 4  | 45   | F |
| A373         | 0.389 | 0.214 | 0.175 | 28.2  | 4  | 3  | 50   | F |
| A374         | 0.385 | 0.103 | 0.282 | 50.4  | 3  | 3  | 11   | M |
| A375         | 0.237 | 0.156 | 0.081 | 8.7   | 2  | 2  | 60   | F |
| A376         | 0.324 | 0.069 | 0.255 | 44.8  | 3  | 3  | 63   | F |
| A377         | 0.392 | 0.115 | 0.277 | 49.3  | 4  | 4  | 54   | F |
| A378         | 0.474 | 0.181 | 0.293 | 52.6  | 4  | 4  | 52   | M |
| A379         | 0.655 | 0.163 | 0.492 | 93.9  | 5  | 5  | 50   | F |
| A380         | 0.336 | 0.112 | 0.224 | 38.3  | 4  | 3  | 4y6m | M |
| A381         | 0.483 | 0.094 | 0.389 | 72.5  | 5  | 5  | 46   | F |
| A382         | 0.322 | 0.109 | 0.213 | 36.1  | 3  | 3  | 39   | F |
| A383         | 0.331 | 0.054 | 0.277 | 49.3  | 3  | 3  | 12   | M |
| A384         | 0.501 | 0.062 | 0.439 | 82.9  | 5  | 5  | 42   | M |
| A385         | 0.419 | 0.108 | 0.311 | 56.4  | 4  | 4  | 20   | M |
| A386         | 0.716 | 0.189 | 0.527 | 101.1 | 5  | 5  | 3    | M |
| A387         | 0.781 | 0.147 | 0.634 | 123.3 | 6  | 6  | 41   | F |
| A388         | 1.017 | 0.307 | 0.71  | 139.0 | 7  | 7  | 48   | F |
| A389         | 0.293 | 0.11  | 0.183 | 29.9  | 4  | 3  | 47   | F |
| A390         | 0.325 | 0.112 | 0.213 | 36.1  | 3  | 3  | 53   | F |
| A391         | 0.775 | 0.264 | 0.511 | 97.8  | 5  | 5  | 66   | M |
| A392         | 0.285 | 0.102 | 0.183 | 29.9  | 3  | 3  | 55   | F |
| A393         | 0.472 | 0.117 | 0.355 | 65.5  | 5  | 5  | 48   | M |
| A394         | 0.511 | 0.123 | 0.388 | 72.3  | 5  | 5  | 18   | F |
| A395         | 0.722 | 0.106 | 0.616 | 119.5 | 5  | 5  | 42   | F |
| A396         | 0.991 | 0.416 | 0.575 | 111.1 | 6  | 6  | 35   | F |
| A397         | 0.445 | 0.07  | 0.375 | 69.6  | 4  | 4  | 1y4m | M |
| A398         | 0.725 | 0.142 | 0.583 | 112.7 | 5  | 5  | 21   | M |
| A399         | 0.246 | 0.164 | 0.082 | 8.9   | 2  | 2  | 63   | F |
| A400         | 0.971 | 0.074 | 0.897 | 177.8 | 6  | 6  | 3    | M |
| A401         | 0.562 | 0.114 | 0.448 | 84.7  | 5  | 5  | 39   | M |
| A402         | 0.336 | 0.15  | 0.186 | 30.5  | 4  | 4  | 25   | F |
| A403         | 0.729 | 0.187 | 0.542 | 104.2 | 5  | 5  | 10   | F |
| A404         | 0.723 | 0.145 | 0.578 | 111.7 | 5  | 5  | 16   | M |
| A405         | 0.427 | 0.099 | 0.328 | 59.9  | 4  | 4  | 20   | F |
| A406         | 0.614 | 0.229 | 0.385 | 71.7  | 5  | 5  | 59   | F |
| A407         | 0.243 | 0.158 | 0.085 | 9.6   | 2  | 2  | 45   | F |
| A408         | 0.409 | 0.078 | 0.331 | 60.5  | 4  | 4  | 52   | F |
| A409         | 0.344 | 0.115 | 0.229 | 39.4  | 5  | 4  | 35   | M |
| A410         | 0.859 | 0.23  | 0.629 | 122.2 | 6  | 6  | 49   | F |
| A411         | 0.748 | 0.137 | 0.611 | 118.5 | 5  | 5  | 17   | F |
| A412         | 0.483 | 0.1   | 0.383 | 71.3  | 5  | 5  | 42   | F |
| A413         | 0.944 | 0.203 | 0.741 | 145.4 | 6  | 6  | 26   | F |
| A414         | 1.252 | 0.359 | 0.893 | 176.9 | 7  | 7  | 32   | F |
| A415         | 0.453 | 0.08  | 0.373 | 69.2  | 5  | 5  | 32   | F |
| A416         | 0.508 | 0.132 | 0.376 | 69.8  | 5  | 5  | 67   | F |
| A417         | 0.933 | 0.292 | 0.641 | 124.7 | 6  | 6  | 50   | F |

|                |              |              |                  |          |                  |                  |            |            |
|----------------|--------------|--------------|------------------|----------|------------------|------------------|------------|------------|
| A418           | 0.282        | 0.145        | 0.137            | 20.3     | 4                | 3                | 1          | M          |
| A419           | 0.812        | 0.2          | 0.612            | 118.7    | 5                | 5                | 19         | M          |
| A420           | 0.373        | 0.149        | 0.224            | 38.3     | 4                | 4                | 29         | M          |
| A421           | 0.364        | 0.114        | 0.25             | 43.7     | 4                | 4                | 45         | M          |
| A422           | 0.634        | 0.135        | 0.499            | 95.3     | 5                | 5                | 8          | F          |
| A423           | 0.347        | 0.102        | 0.245            | 42.7     | 4                | 4                | 3          | M          |
| A424           | 0.541        | 0.098        | 0.443            | 83.7     | 5                | 5                | 20         | F          |
| A425           | 0.325        | 0.096        | 0.229            | 39.4     | 4                | 4                | 20         | F          |
| A426           | 0.643        | 0.144        | 0.499            | 95.3     | 5                | 5                | 55         | F          |
| A427           | 0.387        | 0.119        | 0.268            | 47.5     | 4                | 4                | 31         | F          |
| A428           | 0.395        | 0.141        | 0.254            | 44.6     | 4                | 4                | 35         | F          |
| A429           | 0.609        | 0.197        | 0.412            | 77.3     | 5                | 5                | 40         | M          |
| A430           | 0.423        | 0.107        | 0.316            | 57.4     | 3                | 3                | 60         | F          |
| A431           | 0.636        | 0.245        | 0.391            | 72.9     | 5                | 5                | 40         | F          |
| A432           | 0.982        | 0.76         | 0.222            | 37.9     | 3                | 3                | 10         | F          |
| A433           | 0.886        | 0.155        | 0.731            | 143.4    | 6                | 6                | 50         | F          |
| A434           | 0.516        | 0.156        | 0.36             | 66.5     | 4                | 4                | 21         | F          |
| A435           | 0.525        | 0.111        | 0.414            | 77.7     | 5                | 5                | 53         | F          |
| A436           | 0.269        | 0.079        | 0.19             | 31.3     | 4                | 3                | 34         | F          |
| A437           | 0.317        | 0.121        | 0.196            | 32.5     | 4                | 3                | 40         | F          |
| A438           | 0.605        | 0.161        | 0.444            | 83.9     | 4                | 3                | 54         | F          |
| A439           | 0.451        | 0.114        | 0.337            | 61.8     | 5                | 5                | 11         | M          |
| A440           | 0.284        | 0.102        | 0.182            | 29.6     | 3                | 3                | 55         | F          |
| <b>Plate 7</b> |              |              |                  |          |                  |                  |            |            |
| <b>Sample</b>  | <b>450nm</b> | <b>630nm</b> | <b>450-630nm</b> | <b>%</b> | <b>Colour O1</b> | <b>Colour O2</b> | <b>Age</b> | <b>Sex</b> |
| Blank          | 0.026        | 0.025        | 0.001            |          | No               | No               |            |            |
| Inactivated    | 0.059        | 0.05         | 0.009            |          | No               | No               |            |            |
| Sub negative   | 0.061        | 0.06         | 0.001            |          | No               | No               |            |            |
| 100%           | 1.052        | 0.145        | 0.907            |          | 7                | 7                |            |            |
| 60%            | 0.454        | 0.021        | 0.433            |          | 5                | 5                |            |            |
| 30%            | 0.176        | 0.023        | 0.153            |          | 2                | 2                |            |            |
| 10%            | 0.07         | 0.033        | 0.037            |          | 1                | 1                |            |            |
| A441           | 0.366        | 0.119        | 0.247            | 36.4     | 3                | 3                | 24         | M          |
| A442           | 0.238        | 0.04         | 0.198            | 31.5     | 3                | 3                | 73         | F          |
| A443           | 0.384        | 0.05         | 0.334            | 45.1     | 3                | 3                | 35         | F          |
| A444           | 0.699        | 0.268        | 0.431            | 54.9     | 3                | 3                | 60         | M          |
| A445           | 0.764        | 0.051        | 0.713            | 83.2     | 5                | 5                | 48         | F          |
| A446           | 1.049        | 0.409        | 0.64             | 75.8     | 6                | 6                | 23         | F          |
| A447           | 0.655        | 0.118        | 0.537            | 65.5     | 5                | 5                | 65         | M          |
| A448           | 0.924        | 0.171        | 0.753            | 87.2     | 5                | 5                | 36         | F          |
| A449           | 0.624        | 0.364        | 0.26             | 37.7     | 5                | 5                | 50         | F          |
| A450           | 0.328        | 0.132        | 0.196            | 31.3     | 3                | 3                | 54         | F          |
| A451           | 0.167        | 0.103        | 0.064            | 18.0     | 3                | 3                | 46         | F          |
| A452           | 0.137        | 0.01         | 0.127            | 24.4     | 3                | 3                | 38\12      | F          |
| A453           | 0.398        | 0.046        | 0.352            | 46.9     | 4                | 4                | 45         | M          |
| A454           | 0.678        | 0.088        | 0.59             | 70.8     | 5                | 5                | 18         | M          |
| A455           | 1.091        | 0.302        | 0.789            | 90.8     | 6                | 6                | 65         | F          |
| A456           | 0.551        | 0.121        | 0.43             | 54.8     | 4                | 5                | 61         | F          |
| A457           | 0.446        | 0.226        | 0.22             | 33.7     | 3                | 3                | 12         | M          |
| A458           | 0.439        | 0.093        | 0.346            | 46.3     | 3                | 3                | 47         | M          |
| A459           | 0.574        | 0.012        | 0.562            | 68.0     | 4                | 4                | 66         | M          |
| A460           | 1.117        | 0.498        | 0.619            | 73.7     | 7                | 7                | 8          | M          |
| A461           | 0.157        | 0.045        | 0.112            | 22.8     | 3                | 3                | 63         | F          |
| A462           | 0.457        | 0.043        | 0.414            | 53.2     | 4                | 3                | 54         | M          |
| A463           | 0.672        | 0.193        | 0.479            | 59.7     | 5                | 5                | 62         | F          |
| A464           | 0.389        | 0.197        | 0.192            | 30.9     | 3                | 3                | 64         | F          |
| A465           | 0.473        | 0.036        | 0.437            | 55.5     | 4                | 4                | 37         | M          |
| A466           | 0.609        | 0.28         | 0.329            | 44.6     | 3                | 3                | 14         | M          |
| A467           | 0.199        | 0.012        | 0.187            | 30.4     | 3                | 3                | 56         | F          |
| A468           | 0.453        | 0.173        | 0.28             | 39.7     | 3                | 3                | 19         | F          |
| A469           | 0.431        | 0.04         | 0.391            | 50.9     | 4                | 3                | 46         | M          |
| A470           | 0.276        | 0.087        | 0.189            | 30.6     | 3                | 3                | 40         | M          |
| A471           | 0.205        | 0.015        | 0.19             | 30.7     | 3                | 3                | 55         | F          |
| A472           | 0.259        | 0.038        | 0.221            | 33.8     | 3                | 3                | 23         | M          |
| A473           | 0.511        | 0.168        | 0.343            | 46.0     | 3                | 3                | 49         | M          |
| A474           | 0.287        | 0.04         | 0.247            | 36.4     | 3                | 3                | 52         | F          |
| A475           | 0.172        | 0.049        | 0.123            | 24.0     | 3                | 3                | 66         | M          |



|                |              |              |                  |          |                  |                  |            |            |
|----------------|--------------|--------------|------------------|----------|------------------|------------------|------------|------------|
| A476           | 0.65         | 0.192        | 0.458            | 57.6     | 3                | 3                | 48         | M          |
| A477           | 0.386        | 0.079        | 0.307            | 42.4     | 4                | 3                | 33         | F          |
| A478           | 0.313        | 0.126        | 0.187            | 30.4     | 3                | 3                | 38         | F          |
| A479           | 0.175        | 0.04         | 0.135            | 25.2     | 3                | 3                | 30         | F          |
| A480           | 0.236        | 0.05         | 0.186            | 30.3     | 3                | 3                | 67         | F          |
| A481           | 0.864        | 0.533        | 0.331            | 44.8     | 3                | 3                | 57         | F          |
| A482           | 0.209        | 0.021        | 0.188            | 30.5     | 3                | 3                | 18         | F          |
| A483           | 0.577        | 0.314        | 0.263            | 38.0     | 3                | 3                | 63         | F          |
| A484           | 0.422        | 0.153        | 0.269            | 38.6     | 3                | 3                | 78         | M          |
| A485           | 0.254        | 0.058        | 0.196            | 31.3     | 3                | 3                | 9          | M          |
| A486           | 0.273        | 0.044        | 0.229            | 34.6     | 3                | 3                | 54         | F          |
| A487           | 0.446        | 0.058        | 0.388            | 50.6     | 4                | 4                | 65         | M          |
| A488           | 0.494        | 0.217        | 0.277            | 39.4     | 3                | 3                | 65         | F          |
| A489           | 0.515        | 0.133        | 0.382            | 49.9     | 4                | 4                | 64         | F          |
| A490           | 1.269        | 0.518        | 0.751            | 87.0     | 6                | 6                | 42         | F          |
| A491           | 0.815        | 0.409        | 0.406            | 52.4     | 5                | 5                | 52         | F          |
| A492           | 0.628        | 0.139        | 0.489            | 60.7     | 5                | 5                | 1          | F          |
| A493           | 1.667        | 0.801        | 0.866            | 98.5     | 6                | 6                | 50         | F          |
| A494           | 0.375        | 0.168        | 0.207            | 32.4     | 3                | 3                | 41         | F          |
| A495           | 0.722        | 0.151        | 0.571            | 68.9     | 5                | 5                | 72         | F          |
| A496           | 0.733        | 0.124        | 0.609            | 72.7     | 5                | 5                | 53         | M          |
| A497           | 0.541        | 0.034        | 0.507            | 62.5     | 5                | 5                | 47         | F          |
| A498           | 0.891        | 0.106        | 0.785            | 90.4     | 6                | 6                | 1y5m       | F          |
| A499           | 0.826        | 0.143        | 0.683            | 80.2     | 5                | 5                | 54         | F          |
| A500           | 0.457        | 0.036        | 0.421            | 53.9     | 5                | 4                | 57         | F          |
| A501           | 0.28         | 0.049        | 0.231            | 34.8     | 3                | 3                | 60         | F          |
| A502           | 0.284        | 0.095        | 0.189            | 30.6     | 3                | 3                | 54         | F          |
| A503           | 0.28         | 0.06         | 0.22             | 33.7     | 3                | 3                | 74         | M          |
| A504           | 0.696        | 0.393        | 0.303            | 42.0     | 4                | 4                | 60         | F          |
| A505           | 1.288        | 0.039        | 1.249            | 137.0    | 6                | 6                | 55         | F          |
| A506           | 0.827        | 0.199        | 0.628            | 74.6     | 5                | 5                | 65         | M          |
| A507           | 0.246        | 0.025        | 0.221            | 33.8     | 3                | 3                | 58         | F          |
| A508           | 0.386        | 0.188        | 0.198            | 31.5     | 3                | 3                | 9m         | M          |
| A509           | 0.49         | 0.112        | 0.378            | 49.5     | 3                | 3                | 16         | F          |
| A510           | 0.342        | 0.071        | 0.271            | 38.8     | 3                | 3                | 65         | M          |
| A511           | 0.321        | 0.102        | 0.219            | 33.6     | 3                | 4                | 13         | M          |
| A512           | 1.145        | 0.738        | 0.407            | 52.5     | 4                | 4                | 51         | F          |
| A513           | 0.936        | 0.438        | 0.498            | 61.6     | 5                | 4                | 47         | M          |
| A514           | 0.396        | 0.131        | 0.265            | 38.2     | 3                | 3                | 1y9m       | M          |
| A515           | 0.368        | 0.041        | 0.327            | 44.4     | 3                | 3                | 52         | M          |
| A516           | 0.439        | 0.113        | 0.326            | 44.3     | 3                | 3                | 53         | M          |
| A517           | 0.493        | 0.15         | 0.343            | 46.0     | 3                | 3                | 54         | F          |
| A518           | 0.245        | 0.051        | 0.194            | 31.1     | 3                | 3                | 34         | F          |
| A519           | 1.01         | 0.339        | 0.671            | 79.0     | 4                | 5                | 35         | F          |
| A520           | 0.376        | 0.062        | 0.314            | 43.1     | 3                | 3                | 53         | F          |
| A521           | 0.873        | 0.289        | 0.584            | 70.2     | 5                | 5                | 41         | F          |
| A522           | 0.463        | 0.149        | 0.314            | 43.1     | 3                | 3                | 51         | F          |
| A523           | 0.765        | 0.303        | 0.462            | 58.0     | 5                | 5                | 1y8m       | F          |
| A524           | 0.492        | 0.046        | 0.446            | 56.4     | 3                | 4                | 46         | F          |
|                |              |              |                  |          |                  |                  |            |            |
|                |              |              |                  |          |                  |                  |            |            |
| <b>Plate 8</b> |              |              |                  |          |                  |                  |            |            |
| <b>Sample</b>  | <b>450nm</b> | <b>630nm</b> | <b>450-630nm</b> | <b>%</b> | <b>Colour O1</b> | <b>Colour O2</b> | <b>Age</b> | <b>Sex</b> |
| Blank          | 0.021        | 0.021        | 0                |          | No               | No               |            |            |
| Inactivated    | 0.173        | 0.115        | 0.058            |          | No               | No               |            |            |
| Sub negative   | 0.288        | 0.167        | 0.121            |          | No               | No               |            |            |
| 100%           | 0.986        | 0.149        | 0.837            |          | 6                | 6                |            |            |
| 60%            | 0.519        | 0.127        | 0.392            |          | 4                | 4                |            |            |
| 30%            | 0.246        | 0.08         | 0.166            |          | 3                | 3                |            |            |
| 10%            | 0.205        | 0.053        | 0.152            |          | 2                | 2                |            |            |
| A525           | 0.341        | 0.09         | 0.251            | 33.9     | 4                | 3                | 54         | F          |
| A526           | 0.536        | 0.207        | 0.329            | 43.1     | 4                | 4                | 58         | M          |
| A527           | 0.489        | 0.142        | 0.347            | 45.3     | 4                | 3                | 63         | M          |
| A528           | 0.333        | 0.071        | 0.262            | 35.2     | 4                | 4                | 9days      | M          |
| A529           | 0.407        | 0.102        | 0.305            | 40.3     | 4                | 4                | 64         | F          |
| A530           | 0.385        | 0.073        | 0.312            | 41.1     | 4                | 4                | 58         | M          |
| A531           | 0.403        | 0.065        | 0.338            | 44.2     | 4                | 4                | 60         | F          |
| A532           | 0.353        | 0.062        | 0.291            | 38.6     | 3                | 3                | 43         | F          |
| A533           | 0.701        | 0.103        | 0.598            | 75.1     | 5                | 5                | 15         | M          |

|      |       |       |       |       |   |   |        |   |
|------|-------|-------|-------|-------|---|---|--------|---|
| A534 | 0.539 | 0.145 | 0.394 | 50.9  | 4 | 4 | 2m 21d | F |
| A535 | 0.286 | 0.054 | 0.232 | 31.6  | 3 | 3 | 22     | F |
| A536 | 0.52  | 0.068 | 0.452 | 57.7  | 4 | 4 | 29     | F |
| A537 | 0.588 | 0.24  | 0.348 | 45.4  | 4 | 4 | 54     | F |
| A538 | 0.528 | 0.084 | 0.444 | 56.8  | 5 | 5 | 64     | F |
| A539 | 0.547 | 0.064 | 0.483 | 61.4  | 5 | 5 | 60     | F |
| A540 | 0.667 | 0.138 | 0.529 | 66.9  | 5 | 5 | 49     | F |
| A541 | 0.71  | 0.352 | 0.358 | 46.6  | 3 | 3 | 42     | F |
| A542 | 0.402 | 0.07  | 0.332 | 43.5  | 4 | 4 | 34     | F |
| A543 | 0.233 | 0.067 | 0.166 | 23.8  | 3 | 3 | 50     | F |
| A544 | 0.271 | 0.047 | 0.224 | 30.7  | 3 | 3 | 51     | F |
| A545 | 0.46  | 0.1   | 0.36  | 46.8  | 4 | 4 | 66     | M |
| A546 | 0.549 | 0.109 | 0.44  | 56.3  | 5 | 5 | 32     | F |
| A547 | 0.396 | 0.09  | 0.306 | 40.4  | 4 | 4 | 25     | F |
| A548 | 0.437 | 0.191 | 0.246 | 33.3  | 3 | 3 | 36     | F |
| A549 | 0.532 | 0.227 | 0.305 | 40.3  | 4 | 4 | 61     | M |
| A550 | 0.807 | 0.437 | 0.37  | 48.0  | 4 | 4 | 51     | M |
| A551 | 0.406 | 0.169 | 0.237 | 32.2  | 3 | 3 | 28     | F |
| A552 | 0.457 | 0.172 | 0.285 | 37.9  | 3 | 3 | 84     | M |
| A553 | 0.345 | 0.06  | 0.285 | 37.9  | 3 | 3 | 52     | M |
| A554 | 0.334 | 0.092 | 0.242 | 32.8  | 3 | 3 | 72     | M |
| A555 | 0.343 | 0.114 | 0.229 | 31.3  | 3 | 3 | 74     | F |
| A556 | 0.361 | 0.049 | 0.312 | 41.1  | 3 | 3 | 18     | M |
| A557 | 0.462 | 0.095 | 0.367 | 47.7  | 4 | 4 | 47     | F |
| A558 | 0.236 | 0.011 | 0.225 | 30.8  | 3 | 3 | 36     | F |
| A559 | 0.422 | 0.116 | 0.306 | 40.4  | 3 | 3 | 20     | F |
| A560 | 0.379 | 0.117 | 0.262 | 35.2  | 3 | 3 | 10     | M |
| A561 | 1.138 | 0.863 | 0.275 | 36.7  | 3 | 3 | 72     | F |
| A562 | 0.514 | 0.128 | 0.386 | 49.9  | 4 | 4 | 8      | F |
| A563 | 0.766 | 0.474 | 0.292 | 38.8  | 3 | 3 | 4y6m   | F |
| A564 | 0.654 | 0.126 | 0.528 | 66.8  | 5 | 5 | 56     | F |
| A565 | 0.72  | 0.394 | 0.326 | 42.8  | 4 | 4 | 35     | F |
| A566 | 0.313 | 0.069 | 0.244 | 33.1  | 3 | 3 | 48     | F |
| A567 | 0.563 | 0.096 | 0.467 | 59.5  | 4 | 4 | 65     | M |
| A568 | 1.203 | 0.607 | 0.596 | 74.8  | 5 | 5 | 49     | F |
| A569 | 0.377 | 0.098 | 0.279 | 37.2  | 4 | 4 | 60     | F |
| A570 | 0.633 | 0.148 | 0.485 | 61.7  | 4 | 4 | 1y2m   | M |
| A571 | 1.158 | 0.918 | 0.24  | 32.6  | 3 | 3 | 2y9m   | M |
| A572 | 0.953 | 0.244 | 0.709 | 88.2  | 6 | 6 | 6      | F |
| A573 | 0.764 | 0.194 | 0.57  | 71.7  | 5 | 5 | 49     | F |
| A574 | 0.799 | 0.115 | 0.684 | 85.3  | 5 | 5 | 56     | F |
| A575 | 0.251 | 0.021 | 0.23  | 31.4  | 3 | 3 | 35     | F |
| A576 | 0.282 | 0.059 | 0.223 | 30.6  | 3 | 3 | 61     | F |
| A577 | 0.511 | 0.128 | 0.383 | 49.6  | 4 | 4 | 19     | F |
| A578 | 0.599 | 0.369 | 0.23  | 31.4  | 3 | 3 | 32     | F |
| A579 | 0.223 | 0.109 | 0.114 | 17.6  | 3 | 3 | 41     | F |
| A580 | 0.285 | 0.059 | 0.226 | 30.9  | 3 | 3 | 59     | M |
| A581 | 0.356 | 0.131 | 0.225 | 30.8  | 3 | 3 | 19     | F |
| A582 | 0.417 | 0.163 | 0.254 | 34.3  | 3 | 3 | 26     | F |
| A583 | 0.468 | 0.135 | 0.333 | 43.6  | 3 | 3 | 39     | M |
| A584 | 0.954 | 0.402 | 0.552 | 69.6  | 4 | 4 | 62     | M |
| A585 | 0.914 | 0.098 | 0.816 | 100.9 | 5 | 5 | 31     | F |
| A586 | 1.243 | 0.572 | 0.671 | 83.7  | 5 | 5 | 48     | F |
| A587 | 1.184 | 0.681 | 0.503 | 63.8  | 5 | 5 | 9mon   | F |
| A588 | 0.506 | 0.08  | 0.426 | 54.7  | 5 | 5 | 58     | F |
| A589 | 0.38  | 0.14  | 0.24  | 32.6  | 3 | 3 | 6      | F |
| A590 | 1.183 | 0.527 | 0.656 | 81.9  | 5 | 5 | 51     | F |
| A591 | 0.688 | 0.31  | 0.378 | 49.0  | 3 | 3 | 43     | F |
| A592 | 1.197 | 0.519 | 0.678 | 84.6  | 5 | 5 | 52     | F |
| A593 | 0.305 | 0.081 | 0.224 | 30.7  | 3 | 3 | 35     | F |
| A594 | 0.535 | 0.221 | 0.314 | 41.4  | 3 | 3 | 63     | F |
| A595 | 0.828 | 0.418 | 0.41  | 52.8  | 3 | 3 | 48     | F |
| A596 | 1.312 | 0.424 | 0.888 | 109.5 | 5 | 5 | 55     | F |
| A597 | 0.427 | 0.155 | 0.272 | 36.4  | 3 | 3 | 64     | M |
| A598 | 1.948 | 0.944 | 1.004 | 123.2 | 6 | 6 | 8      | M |
| A599 | 0.503 | 0.107 | 0.396 | 51.1  | 3 | 3 | 8      | F |
| A600 | 0.496 | 0.141 | 0.355 | 46.2  | 4 | 4 | 71     | F |
| A601 | 0.931 | 0.629 | 0.302 | 39.9  | 3 | 3 | 43     | F |

|                |              |              |                  |          |                  |                  |            |            |
|----------------|--------------|--------------|------------------|----------|------------------|------------------|------------|------------|
| A602           | 0.356        | 0.133        | 0.223            | 30.6     | 3                | 3                | 28         | F          |
| A603           | 0.864        | 0.274        | 0.59             | 74.1     | 5                | 5                | 79         | F          |
| A604           | 0.317        | 0.082        | 0.235            | 32.0     | 3                | 3                | 58         | F          |
| A605           | 0.491        | 0.087        | 0.404            | 52.0     | 3                | 3                | 1          | M          |
| A606           | 0.343        | 0.066        | 0.277            | 37.0     | 3                | 3                | 30         | M          |
| A607           | 0.366        | 0.082        | 0.284            | 37.8     | 3                | 3                | 61         | M          |
| A608           | 1.65         | 0.937        | 0.713            | 88.7     | 6                | 6                | 36         | M          |
|                |              |              |                  |          |                  |                  |            |            |
| <b>Plate 9</b> |              |              |                  |          |                  |                  |            |            |
| <b>Sample</b>  | <b>450nm</b> | <b>630nm</b> | <b>450-630nm</b> | <b>%</b> | <b>Colour O1</b> | <b>Colour O2</b> | <b>Age</b> | <b>Sex</b> |
| Blank          | 0.02         | 0.02         | 0                |          | No               | No               |            |            |
| Inactivated    | 0.138        | 0.11         | 0.028            |          | No               | No               |            |            |
| Sub negative   | 0.2          | 0.022        | 0.178            |          | No               | No               |            |            |
| 100%           | 0.729        | 0.053        | 0.676            |          | 5                | 5                |            |            |
| 60%            | 0.416        | 0.052        | 0.364            |          | 4                | 4                |            |            |
| 30%            | 0.246        | 0.044        | 0.202            |          | 3                | 3                |            |            |
| 10%            | 0.157        | 0.048        | 0.109            |          | 2                | 2                |            |            |
| A609           | 0.669        | 0.329        | 0.34             | 50.4     | 3                | 4                | 52         | F          |
| A610           | 0.485        | 0.116        | 0.369            | 54.9     | 5                | 5                | 65         | F          |
| A611           | 1.061        | 0.274        | 0.787            | 120.2    | 6                | 6                | 51         | F          |
| A612           | 0.499        | 0.125        | 0.374            | 55.7     | 5                | 5                | 65         | F          |
| A613           | 1.064        | 0.415        | 0.649            | 98.6     | 5                | 5                | 58         | F          |
| A614           | 0.745        | 0.158        | 0.587            | 88.9     | 5                | 5                | 47 / 12    | F          |
| A615           | 0.505        | 0.206        | 0.299            | 43.9     | 3                | 3                | 44         | F          |
| A616           | 0.261        | 0.044        | 0.217            | 31.1     | 3                | 3                | 58         | F          |
| A617           | 1.189        | 0.611        | 0.578            | 87.5     | 5                | 5                | 55         | F          |
| A618           | 0.227        | 0.073        | 0.154            | 21.3     | 3                | 3                | 49         | M          |
| A619           | 0.21         | 0.055        | 0.155            | 21.4     | 3                | 3                | 60         | M          |
| A620           | 0.536        | 0.064        | 0.472            | 71.0     | 3                | 4                | 20         | F          |
| A621           | 0.28         | 0.062        | 0.218            | 31.3     | 3                | 3                | 32         | F          |
| A622           | 0.849        | 0.172        | 0.677            | 103.0    | 5                | 5                | 26         | F          |
| A623           | 0.51         | 0.079        | 0.431            | 64.6     | 4                | 3                | 64         | F          |
| A624           | 0.455        | 0.118        | 0.337            | 49.9     | 3                | 3                | 26         | M          |
| A625           | 0.306        | 0.064        | 0.242            | 35.0     | 3                | 3                | 16 / 12    | M          |
| A626           | 0.328        | 0.086        | 0.242            | 35.0     | 3                | 3                | 68         | M          |
| A627           | 0.336        | 0.068        | 0.268            | 39.1     | 3                | 3                | 24         | F          |
| A628           | 0.359        | 0.069        | 0.29             | 42.5     | 3                | 3                | 34         | M          |
| A629           | 0.2          | 0.085        | 0.115            | 15.2     | 3                | 3                | 59         | M          |
| A630           | 0.421        | 0.124        | 0.297            | 43.6     | 3                | 3                | 41         | F          |
| A631           | 0.423        | 0.09         | 0.333            | 49.3     | 3                | 3                | 57         | F          |
| A632           | 0.436        | 0.148        | 0.288            | 42.2     | 3                | 3                | 44         | F          |
| A633           | 0.528        | 0.086        | 0.442            | 66.3     | 3                | 4                | 29         | M          |
| A634           | 0.347        | 0.094        | 0.253            | 36.8     | 3                | 3                | 56         | F          |
| A635           | 0.557        | 0.085        | 0.472            | 71.0     | 5                | 5                | 50         | M          |
| A636           | 0.331        | 0.109        | 0.222            | 31.9     | 3                | 3                | 62         | F          |
| A637           | 0.298        | 0.086        | 0.212            | 30.4     | 3                | 3                | 10         | M          |
| A638           | 0.638        | 0.121        | 0.517            | 78.0     | 5                | 5                | 68         | F          |
| A639           | 0.295        | 0.081        | 0.214            | 30.7     | 3                | 3                | 53         | F          |
| A640           | 0.398        | 0.141        | 0.257            | 37.4     | 3                | 3                | 43         | F          |
| A641           | 0.331        | 0.106        | 0.225            | 32.4     | 4                | 4                | 53         | F          |
| A642           | 0.6          | 0.178        | 0.422            | 63.2     | 4                | 4                | 37         | M          |
| A643           | 1.123        | 0.065        | 1.058            | 162.5    | 7                | 7                | 33         | F          |
| A644           | 0.36         | 0.072        | 0.288            | 42.2     | 3                | 4                | 72         | F          |
| A645           | 0.562        | 0.094        | 0.468            | 70.4     | 4                | 4                | 64         | M          |
| A646           | 0.654        | 0.139        | 0.515            | 77.7     | 5                | 5                | 68         | M          |
| A647           | 0.403        | 0.118        | 0.285            | 41.8     | 4                | 4                | 54         | M          |
| A648           | 0.645        | 0.163        | 0.482            | 72.5     | 4                | 4                | 62         | M          |
| A649           | 0.9          | 0.123        | 0.777            | 118.6    | 5                | 5                | 38         | M          |
| A650           | 0.577        | 0.097        | 0.48             | 72.2     | 4                | 4                | 53         | F          |
| A651           | 0.776        | 0.078        | 0.698            | 106.3    | 5                | 5                | 65         | F          |
| A652           | 0.538        | 0.128        | 0.41             | 61.3     | 4                | 4                | 43         | F          |
| A653           | 0.363        | 0.107        | 0.256            | 37.2     | 3                | 3                | 65         | M          |
| A654           | 0.329        | 0.102        | 0.227            | 32.7     | 3                | 3                | 70         | M          |
| A655           | 0.44         | 0.106        | 0.334            | 49.4     | 3                | 3                | 14         | M          |
| A656           | 0.419        | 0.137        | 0.282            | 41.3     | 3                | 3                | 52         | M          |
| A657           | 0.456        | 0.171        | 0.285            | 41.8     | 3                | 3                | 56         | F          |
| A658           | 0.428        | 0.211        | 0.217            | 31.1     | 4                | 4                | 7          | M          |
| A659           | 1.276        | 0.09         | 1.186            | 182.5    | 7                | 7                | 63         | F          |

|                 |              |              |                  |          |                  |                  |            |            |
|-----------------|--------------|--------------|------------------|----------|------------------|------------------|------------|------------|
| A660            | 0.539        | 0.107        | 0.432            | 64.7     | 4                | 4                | 43         | M          |
| A661            | 0.831        | 0.106        | 0.725            | 110.5    | 5                | 5                | 40         | M          |
| A662            | 0.359        | 0.106        | 0.253            | 36.8     | 3                | 3                | 35         | F          |
| A663            | 0.489        | 0.118        | 0.371            | 55.2     | 3                | 3                | 61         | M          |
| A664            | 0.255        | 0.039        | 0.216            | 31.0     | 4                | 4                | 66         | F          |
| A665            | 0.662        | 0.111        | 0.551            | 83.3     | 4                | 4                | 73         | M          |
| A666            | 0.417        | 0.201        | 0.216            | 31.0     | 3                | 4                | 1 3/12     | M          |
| A667            | 0.52         | 0.136        | 0.384            | 57.2     | 4                | 4                | 69         | F          |
| A668            | 0.713        | 0.151        | 0.562            | 85.0     | 4                | 4                | 52         | F          |
| A669            | 0.893        | 0.14         | 0.753            | 114.9    | 5                | 5                | 21         | M          |
| A670            | 0.352        | 0.098        | 0.254            | 36.9     | 3                | 3                | 61         | F          |
| A671            | 0.694        | 0.127        | 0.567            | 85.8     | 5                | 5                | 50         | F          |
| A672            | 0.321        | 0.105        | 0.216            | 31.0     | 4                | 4                | 14         | F          |
| A673            | 0.83         | 0.113        | 0.717            | 109.3    | 5                | 5                | 72         | F          |
| A674            | 0.628        | 0.132        | 0.496            | 74.7     | 3                | 4                | 44         | F          |
| A675            | 0.46         | 0.112        | 0.348            | 51.6     | 4                | 4                | 68         | F          |
| A676            | 0.629        | 0.123        | 0.506            | 76.3     | 5                | 5                | 58         | F          |
| A677            | 0.322        | 0.109        | 0.213            | 30.5     | 4                | 4                | 64         | F          |
| A678            | 0.727        | 0.187        | 0.54             | 81.6     | 4                | 4                | 53         | M          |
| A679            | 0.873        | 0.131        | 0.742            | 113.2    | 5                | 5                | 61         | M          |
| A680            | 0.297        | 0.083        | 0.214            | 30.7     | 3                | 3                | 81         | F          |
| A681            | 0.359        | 0.126        | 0.233            | 33.6     | 3                | 3                | 4          | M          |
| A682            | 0.25         | 0.016        | 0.234            | 33.8     | 4                | 4                | 70         | F          |
| A683            | 0.835        | 0.103        | 0.732            | 111.6    | 4                | 4                | 72         | F          |
| A684            | 0.344        | 0.126        | 0.218            | 31.3     | 3                | 3                | 1 y 5mon   | M          |
| A685            | 0.313        | 0.094        | 0.219            | 31.4     | 4                | 3                | 48         | F          |
| A686            | 0.467        | 0.176        | 0.291            | 42.7     | 3                | 3                | 67         | F          |
| A687            | 0.339        | 0.119        | 0.22             | 31.6     | 3                | 3                | 75         | M          |
| A688            | 0.402        | 0.16         | 0.242            | 35.0     | 3                | 3                | 21         | F          |
| A689            | 0.417        | 0.132        | 0.285            | 41.8     | 3                | 3                | 10mon      | M          |
| A690            | 0.491        | 0.153        | 0.338            | 50.0     | 3                | 4                | 51         | F          |
| A691            | 0.307        | 0.093        | 0.214            | 30.7     | 3                | 3                | 61         | F          |
| A692            | 0.427        | 0.176        | 0.251            | 36.4     | 3                | 3                | 55         | F          |
| <b>Plate 10</b> |              |              |                  |          |                  |                  |            |            |
| <b>Sample</b>   | <b>450nm</b> | <b>630nm</b> | <b>450-630nm</b> | <b>%</b> | <b>Colour O1</b> | <b>Colour O2</b> | <b>Age</b> | <b>Sex</b> |
| Blank           | 0.02         | 0.02         | 0                |          | No               | No               |            |            |
| Inactivated     | 0.096        | 0.063        | 0.033            |          | No               | No               |            |            |
| Sub negative    | 0.11         | 0.09         | 0.02             |          | No               | No               |            |            |
| 100%            | 0.437        | 0.054        | 0.383            |          | 4                | 4                |            |            |
| 60%             | 0.385        | 0.109        | 0.276            |          | 3                | 3                |            |            |
| 30%             | 0.128        | 0.059        | 0.069            |          | 2                | 2                |            |            |
| 10%             | 0.107        | 0.067        | 0.04             |          | 1                | 1                |            |            |
| A693            | 0.344        | 0.087        | 0.257            | 65.0     | 3                | 3                | 34         | F          |
| A694            | 0.757        | 0.085        | 0.672            | 161.1    | 5                | 5                | 37         | M          |
| A695            | 0.756        | 0.35         | 0.406            | 99.5     | 5                | 5                | 48         | M          |
| A696            | 0.322        | 0.124        | 0.198            | 51.4     | 3                | 3                | 49         | M          |
| A697            | 0.174        | 0.05         | 0.124            | 34.3     | 3                | 3                | 31         | F          |
| A698            | 0.462        | 0.05         | 0.412            | 100.9    | 4                | 4                | 26         | M          |
| A699            | 0.184        | 0.077        | 0.107            | 30.3     | 3                | 3                | 63         | F          |
| A700            | 0.691        | 0.26         | 0.431            | 105.3    | 4                | 4                | 81         | F          |
| A701            | 0.387        | 0.177        | 0.21             | 54.2     | 3                | 3                | 52         | F          |
| A702            | 0.461        | 0.098        | 0.363            | 89.6     | 4                | 4                | 52         | F          |
| A703            | 0.823        | 0.053        | 0.77             | 183.8    | 6                | 6                | 3          | M          |
| A704            | 0.461        | 0.036        | 0.425            | 103.9    | 5                | 5                | 45         | F          |
| A705            | 0.193        | 0.0386       | 0.1544           | 41.3     | 3                | 3                | 46         | F          |
| A706            | 0.49         | 0.054        | 0.436            | 106.5    | 5                | 5                | 37         | M          |
| A707            | 0.341        | 0.058        | 0.283            | 71.1     | 3                | 3                | 48         | F          |
| A708            | 0.317        | 0.048        | 0.269            | 67.8     | 3                | 3                | 7          | M          |
| A709            | 0.219        | 0.054        | 0.165            | 43.7     | 3                | 3                | 8          | F          |
| A710            | 0.451        | 0.06         | 0.391            | 96.1     | 5                | 5                | 20         | M          |
| A711            | 0.442        | 0.044        | 0.398            | 97.7     | 5                | 5                | 20         | M          |
| A712            | 0.409        | 0.057        | 0.352            | 87.0     | 4                | 4                | 21         | M          |
| A713            | 0.244        | 0.059        | 0.185            | 48.4     | 4                | 4                | 2y11m      | F          |
| A714            | 0.4          | 0.071        | 0.329            | 81.7     | 3                | 4                | 21         | M          |
| A715            | 0.353        | 0.047        | 0.306            | 76.4     | 4                | 4                | 37         | M          |
| A716            | 0.333        | 0.038        | 0.295            | 73.8     | 3                | 3                | 66         | M          |
| A717            | 0.385        | 0.043        | 0.342            | 84.7     | 4                | 4                | 21         | M          |

|                 |              |              |                  |          |                  |                  |            |            |
|-----------------|--------------|--------------|------------------|----------|------------------|------------------|------------|------------|
| A718            | 0.379        | 0.047        | 0.332            | 82.4     | 4                | 4                | 45         | M          |
| A719            | 0.445        | 0.074        | 0.371            | 91.4     | 4                | 4                | 1          | M          |
| A720            | 0.286        | 0.032        | 0.254            | 64.4     | 3                | 3                | 1y6m       | M          |
| A721            | 0.31         | 0.049        | 0.261            | 66.0     | 4                | 4                | 40         | F          |
| A722            | 0.236        | 0.054        | 0.182            | 47.7     | 3                | 3                | 1          | M          |
| A723            | 0.411        | 0.083        | 0.328            | 81.5     | 4                | 4                | 51         | M          |
| A724            | 0.253        | 0.044        | 0.209            | 53.9     | 3                | 3                | 58         | F          |
| A725            | 0.326        | 0.047        | 0.279            | 70.1     | 3                | 3                | 37         | F          |
| A726            | 0.172        | 0.062        | 0.11             | 31.0     | 3                | 3                | 26         | F          |
| A727            | 0.486        | 0.046        | 0.44             | 107.4    | 4                | 4                | 54         | F          |
| A728            | 0.226        | 0.018        | 0.208            | 53.7     | 3                | 3                | 18         | M          |
| A729            | 0.192        | 0.052        | 0.14             | 38.0     | 3                | 3                | 22         | F          |
| A730            | 0.308        | 0.064        | 0.244            | 62.0     | 3                | 3                | 49         | F          |
| A731            | 0.297        | 0.064        | 0.233            | 59.5     | 3                | 3                | 24         | F          |
| A732            | 0.369        | 0.041        | 0.328            | 81.5     | 4                | 4                | 50         | F          |
| A733            | 0.337        | 0.032        | 0.305            | 76.2     | 4                | 4                | 2          | M          |
| A734            | 0.289        | 0.053        | 0.236            | 60.2     | 3                | 3                | 26         | F          |
| A735            | 0.26         | 0.084        | 0.176            | 46.3     | 3                | 3                | 52         | F          |
| A736            | 0.402        | 0.089        | 0.313            | 78.0     | 4                | 4                | 2          | F          |
| A737            | 0.266        | 0.046        | 0.22             | 56.5     | 3                | 3                | 64         | F          |
| A738            | 0.237        | 0.049        | 0.188            | 49.1     | 3                | 3                | 60         | F          |
| A739            | 0.366        | 0.062        | 0.304            | 75.9     | 4                | 4                | 52         | F          |
| A740            | 0.353        | 0.045        | 0.308            | 76.9     | 4                | 4                | 38         | F          |
| A741            | 0.31         | 0.065        | 0.245            | 62.3     | 3                | 3                | 21         | F          |
| A742            | 0.339        | 0.064        | 0.275            | 69.2     | 3                | 3                | 60         | F          |
| A743            | 0.249        | 0.046        | 0.203            | 52.5     | 3                | 3                | 34         | F          |
| A744            | 0.339        | 0.032        | 0.307            | 76.6     | 4                | 4                | 44         | F          |
| A745            | 0.144        | 0.035        | 0.109            | 30.8     | 3                | 3                | 70         | F          |
| A746            | 0.26         | 0.055        | 0.205            | 53.0     | 3                | 3                | 3y4m       | M          |
| A747            | 0.341        | 0.044        | 0.297            | 74.3     | 3                | 3                | 73         | F          |
| A748            | 0.477        | 0.043        | 0.434            | 106.0    | 4                | 4                | 31         | F          |
| A749            | 0.294        | 0.041        | 0.253            | 64.1     | 3                | 3                | 52         | F          |
| A750            | 0.27         | 0.16         | 0.11             | 31.0     | 3                | 3                | 57         | M          |
| A751            | 0.534        | 0.212        | 0.322            | 80.1     | 4                | 4                | 57         | F          |
| A752            | 0.689        | 0.031        | 0.658            | 157.9    | 5                | 5                | 1y3m       | M          |
| A753            | 0.096        | 0.078        | 0.018            | 9.7      | 2                | 2                | 5          | F          |
| A754            | 0.201        | 0.058        | 0.143            | 38.7     | 3                | 3                | 68         | F          |
| A755            | 0.218        | 0.068        | 0.15             | 40.3     | 3                | 3                | 30         | F          |
| A756            | 0.298        | 0.056        | 0.242            | 61.6     | 3                | 3                | 44         | F          |
| A757            | 0.308        | 0.087        | 0.221            | 56.7     | 3                | 4                | 11         | F          |
| A758            | 0.297        | 0.047        | 0.25             | 63.4     | 3                | 3                | 2y5m       | F          |
| A759            | 0.236        | 0.059        | 0.177            | 46.5     | 3                | 3                | 11         | F          |
| A760            | 0.121        | 0.043        | 0.078            | 23.6     | 3                | 3                | 62         | F          |
| A761            | 0.175        | 0.057        | 0.118            | 32.9     | 3                | 3                | 62         | F          |
| A762            | 0.162        | 0.053        | 0.109            | 30.8     | 3                | 3                | 49         | F          |
| A763            | 0.236        | 0.095        | 0.141            | 38.2     | 3                | 3                | 70         | M          |
| A764            | 0.347        | 0.24         | 0.107            | 30.3     | 4                | 4                | 33         | F          |
| A765            | 0.531        | 0.076        | 0.455            | 110.9    | 5                | 5                | 75         | M          |
| A766            | 0.189        | 0.081        | 0.108            | 30.6     | 3                | 3                | 24         | F          |
| A767            | 0.336        | 0.1          | 0.236            | 60.2     | 3                | 3                | 46         | M          |
| A768            | 0.205        | 0.037        | 0.168            | 44.4     | 3                | 3                | 49         | F          |
| A769            | 0.163        | 0.053        | 0.11             | 31.0     | 3                | 3                | 49         | F          |
| A770            | 0.152        | 0.037        | 0.115            | 32.2     | 3                | 3                | 19         | F          |
| A771            | 0.236        | 0.053        | 0.183            | 47.9     | 3                | 3                | 22         | F          |
| A772            | 0.364        | 0.109        | 0.255            | 64.6     | 3                | 3                | 39         | F          |
| A773            | 0.292        | 0.069        | 0.223            | 57.2     | 4                | 4                | 21         | F          |
| A774            | 0.355        | 0.148        | 0.207            | 53.5     | 4                | 4                | 55         | M          |
| A775            | 0.687        | 0.068        | 0.619            | 148.9    | 5                | 5                | 40         | M          |
| A776            | 0.297        | 0.068        | 0.229            | 58.6     | 3                | 3                | 56         | F          |
| <b>Plate 11</b> |              |              |                  |          |                  |                  |            |            |
| <b>Sample</b>   | <b>450nm</b> | <b>630nm</b> | <b>450-630nm</b> | <b>%</b> | <b>Colour O1</b> | <b>Colour O2</b> | <b>Age</b> | <b>Sex</b> |
| Blank           | 0.01         | 0.01         | 0                |          | No               | No               |            |            |
| Inactivated     | 0.132        | 0.098        | 0.034            |          | No               | No               |            |            |
| Sub negative    | 0.112        | 0.077        | 0.035            |          | No               | No               |            |            |
| 100%            | 0.478        | 0.098        | 0.38             |          | 5                | 5                |            |            |
| 60%             | 0.361        | 0.115        | 0.246            |          | 4                | 4                |            |            |
| 30%             | 0.211        | 0.087        | 0.124            |          | 3                | 3                |            |            |

|      |             |              |              |       |          |          |      |   |
|------|-------------|--------------|--------------|-------|----------|----------|------|---|
| 10%  | <b>0.13</b> | <b>0.074</b> | <b>0.056</b> |       | <b>2</b> | <b>2</b> |      |   |
| A777 | 0.23        | 0.098        | <b>0.132</b> | 30.9  | 3        | 3        | 1    | F |
| A778 | 0.342       | 0.065        | <b>0.277</b> | 70.7  | 4        | 4        | 70   | M |
| A779 | 0.279       | 0.12         | <b>0.159</b> | 38.3  | 3        | 3        | 23   | F |
| A780 | 0.252       | 0.121        | <b>0.131</b> | 30.7  | 3        | 3        | 53   | F |
| A781 | 0.172       | 0.044        | <b>0.128</b> | 29.8  | 3        | 3        | 49   | M |
| A782 | 0.201       | 0.075        | <b>0.126</b> | 29.3  | 3        | 3        | 6    | M |
| A783 | 0.251       | 0.12         | <b>0.131</b> | 30.7  | 3        | 3        | 54   | F |
| A784 | 0.44        | 0.108        | <b>0.332</b> | 85.8  | 4        | 4        | 49   | M |
| A785 | 0.384       | 0.092        | <b>0.292</b> | 74.8  | 4        | 4        | 25   | F |
| A786 | 0.201       | 0.086        | <b>0.115</b> | 26.3  | 3        | 3        | 54   | F |
| A787 | 0.17        | 0.058        | <b>0.112</b> | 25.4  | 3        | 3        | 60   | F |
| A788 | 0.286       | 0.095        | <b>0.191</b> | 47.1  | 3        | 3        | 33   | F |
| A789 | 0.196       | 0.079        | <b>0.117</b> | 26.8  | 3        | 3        | 2    | F |
| A790 | 0.79        | 0.102        | <b>0.688</b> | 183.5 | 5        | 5        | 55   | F |
| A791 | 0.229       | 0.095        | <b>0.134</b> | 31.5  | 4        | 4        | 7    | M |
| A792 | 0.439       | 0.065        | <b>0.374</b> | 97.3  | 3        | 4        | 62   | F |
| A793 | 0.189       | 0.075        | <b>0.114</b> | 26.0  | 3        | 3        | 45   | F |
| A794 | 0.221       | 0.088        | <b>0.133</b> | 31.2  | 3        | 3        | 67   | F |
| A795 | 0.249       | 0.11         | <b>0.139</b> | 32.9  | 3        | 3        | 74   | F |
| A796 | 0.301       | 0.109        | <b>0.192</b> | 47.4  | 3        | 4        | 1y5m | F |
| A797 | 0.173       | 0.048        | <b>0.125</b> | 29.0  | 3        | 3        | 28   | F |
| A798 | 0.216       | 0.06         | <b>0.156</b> | 37.5  | 3        | 3        | 57   | F |
| A799 | 0.42        | 0.23         | <b>0.19</b>  | 46.8  | 3        | 3        | 50   | F |
| A800 | 0.207       | 0.108        | <b>0.099</b> | 21.9  | 3        | 3        | 74   | M |
| A801 | 0.117       | 0.088        | <b>0.029</b> | 2.7   | 2        | 2        | 24   | F |
| A802 | 0.278       | 0.143        | <b>0.135</b> | 31.8  | 3        | 3        | 65   | F |
| A803 | 0.403       | 0.148        | <b>0.255</b> | 64.7  | 4        | 4        | 60   | M |
| A804 | 0.421       | 0.137        | <b>0.284</b> | 72.6  | 4        | 4        | 34   | F |
| A805 | 0.151       | 0.067        | <b>0.084</b> | 17.8  | 3        | 3        | 22   | F |
| A806 | 0.207       | 0.104        | <b>0.103</b> | 23.0  | 4        | 4        | 23   | F |
| A807 | 0.207       | 0.11         | <b>0.097</b> | 21.3  | 3        | 3        | 45   | M |
| A808 | 0.142       | 0.076        | <b>0.066</b> | 12.8  | 3        | 3        | 39   | F |
| A809 | 0.206       | 0.079        | <b>0.127</b> | 29.6  | 3        | 3        | 52   | F |
| A810 | 0.227       | 0.089        | <b>0.138</b> | 32.6  | 3        | 3        | 52   | F |
| A811 | 0.477       | 0.056        | <b>0.421</b> | 110.2 | 5        | 5        | 40   | F |
| A812 | 0.189       | 0.083        | <b>0.106</b> | 23.8  | 3        | 3        | 60   | F |
| A813 | 0.266       | 0.071        | <b>0.195</b> | 48.2  | 4        | 4        | 56   | M |
| A814 | 0.215       | 0.084        | <b>0.131</b> | 30.7  | 3        | 3        | 69   | M |
| A815 | 0.206       | 0.081        | <b>0.125</b> | 29.0  | 3        | 3        | 70   | F |
| A816 | 0.195       | 0.124        | <b>0.071</b> | 14.2  | 3        | 3        | 0.9  | M |
| A817 | 0.179       | 0.057        | <b>0.122</b> | 28.2  | 3        | 3        | 19   | M |
| A818 | 0.187       | 0.123        | <b>0.064</b> | 12.3  | 3        | 3        | 9    | F |
| A819 | 0.341       | 0.102        | <b>0.239</b> | 60.3  | 4        | 4        | 47   | M |
| A820 | 0.233       | 0.098        | <b>0.135</b> | 31.8  | 3        | 3        | 32   | F |
| A821 | 0.173       | 0.059        | <b>0.114</b> | 26.0  | 4        | 4        | 9    | F |
| A822 | 0.199       | 0.074        | <b>0.125</b> | 29.0  | 3        | 3        | 85   | M |
| A823 | 0.282       | 0.099        | <b>0.183</b> | 44.9  | 3        | 3        | 66   | M |
| A824 | 0.258       | 0.09         | <b>0.168</b> | 40.8  | 3        | 3        | 40   | M |
| A825 | 0.25        | 0.067        | <b>0.183</b> | 44.9  | 3        | 3        | 11   | M |
| A826 | 0.327       | 0.155        | <b>0.172</b> | 41.9  | 3        | 3        | 55   | F |
| A827 | 0.104       | 0.064        | <b>0.04</b>  | 5.7   | 2        | 2        | 36   | M |
| A828 | 0.256       | 0.112        | <b>0.144</b> | 34.2  | 3        | 3        | 72   | M |
| A829 | 0.223       | 0.072        | <b>0.151</b> | 36.1  | 4        | 4        | 34   | F |
| A830 | 0.195       | 0.093        | <b>0.102</b> | 22.7  | 3        | 3        | 55   | F |
| A831 | 0.22        | 0.094        | <b>0.126</b> | 29.3  | 3        | 3        | 47   | F |
| A832 | 0.253       | 0.118        | <b>0.135</b> | 31.8  | 3        | 3        | 20   | F |
| A833 | 0.248       | 0.082        | <b>0.166</b> | 40.3  | 3        | 3        | 18   | F |
| A834 | 0.247       | 0.093        | <b>0.154</b> | 37.0  | 3        | 3        | 22   | M |
| A835 | 0.358       | 0.076        | <b>0.282</b> | 72.1  | 4        | 4        | 47   | F |
| A836 | 0.337       | 0.09         | <b>0.247</b> | 62.5  | 4        | 4        | 20   | F |
| A837 | 0.227       | 0.069        | <b>0.158</b> | 38.1  | 4        | 4        | 64   | F |
| A838 | 0.201       | 0.095        | <b>0.106</b> | 23.8  | 3        | 3        | 56   | F |
| A839 | 0.492       | 0.287        | <b>0.205</b> | 51.0  | 4        | 4        | 30   | F |
| A840 | 0.364       | 0.107        | <b>0.257</b> | 65.2  | 3        | 4        | 62   | F |
| A841 | 0.205       | 0.124        | <b>0.081</b> | 16.9  | 3        | 3        | 52   | F |
| A842 | 0.429       | 0.146        | <b>0.283</b> | 72.4  | 4        | 4        | 2y6m | F |
| A843 | 0.643       | 0.146        | <b>0.497</b> | 131.1 | 5        | 5        | 63   | M |

|                 |              |              |                  |          |                  |                  |            |            |
|-----------------|--------------|--------------|------------------|----------|------------------|------------------|------------|------------|
| A844            | 0.298        | 0.08         | 0.218            | 54.5     | 3                | 4                | 29         | F          |
| A845            | 0.168        | 0.063        | 0.105            | 23.5     | 3                | 3                | 56         | F          |
| A846            | 0.143        | 0.019        | 0.124            | 28.7     | 3                | 3                | 2          | F          |
| A847            | 0.261        | 0.095        | 0.166            | 40.3     | 4                | 4                | 46         | F          |
| A848            | 0.349        | 0.105        | 0.244            | 61.7     | 4                | 4                | 5          | M          |
| A849            | 0.192        | 0.061        | 0.131            | 30.7     | 3                | 3                | 52         | F          |
| A850            | 0.227        | 0.09         | 0.137            | 32.3     | 3                | 3                | 48         | F          |
| A851            | 0.185        | 0.073        | 0.112            | 25.4     | 3                | 3                | 63         | F          |
| A852            | 0.165        | 0.09         | 0.075            | 15.3     | 3                | 3                | 65         | F          |
| A853            | 0.215        | 0.09         | 0.125            | 29.0     | 3                | 3                | 38         | F          |
| A854            | 0.246        | 0.104        | 0.142            | 33.7     | 3                | 3                | 57         | F          |
| A855            | 0.369        | 0.164        | 0.205            | 51.0     | 3                | 4                | 20         | F          |
| A856            | 0.528        | 0.122        | 0.406            | 106.1    | 4                | 4                | 60         | F          |
| A857            | 0.333        | 0.102        | 0.231            | 58.1     | 3                | 4                | 52         | M          |
| A858            | 0.493        | 0.255        | 0.238            | 60.0     | 3                | 4                | 19         | F          |
| A859            | 0.196        | 0.085        | 0.111            | 25.2     | 3                | 3                | 60         | F          |
| A860            | 0.352        | 0.19         | 0.162            | 39.2     | 3                | 3                | 57         | F          |
| <b>Plate 12</b> |              |              |                  |          |                  |                  |            |            |
| <b>Sample</b>   | <b>450nm</b> | <b>630nm</b> | <b>450-630nm</b> | <b>%</b> | <b>Colour O1</b> | <b>Colour O2</b> | <b>Age</b> | <b>Sex</b> |
| Blank           | 0.015        | 0.015        | 0                |          | No               | No               |            |            |
| Inactivated     | 0.12         | 0.088        | 0.032            |          | No               | No               |            |            |
| Sub negative    | 0.154        | 0.119        | 0.035            |          | No               | No               |            |            |
| 100%            | 0.609        | 0.013        | 0.596            |          | 5                | 5                |            |            |
| 60%             | 0.261        | 0.013        | 0.248            |          | 4                | 4                |            |            |
| 30%             | 0.179        | 0.075        | 0.104            |          | 3                | 3                |            |            |
| 10%             | 0.14         | 0.051        | 0.089            |          | 2                | 2                |            |            |
| A861            | 0.339        | 0.08         | 0.259            | 50.0     | 4                | 4                | 40         | M          |
| A862            | 0.436        | 0.119        | 0.317            | 59.2     | 4                | 4                | 34         | F          |
| A863            | 0.197        | 0.046        | 0.151            | 32.7     | 3                | 3                | 60         | F          |
| A864            | 0.14         | 0.099        | 0.041            | 15.1     | 3                | 3                | 55         | F          |
| A865            | 0.127        | 0.045        | 0.082            | 21.7     | 4                | 4                | 57         | F          |
| A866            | 0.188        | 0.045        | 0.143            | 31.4     | 3                | 3                | 36         | F          |
| A867            | 0.332        | 0.195        | 0.137            | 30.5     | 3                | 3                | 62         | F          |
| A868            | 0.37         | 0.173        | 0.197            | 40.0     | 3                | 4                | 53         | F          |
| A869            | 0.234        | 0.078        | 0.156            | 33.5     | 3                | 3                | 33         | F          |
| A870            | 0.196        | 0.05         | 0.146            | 31.9     | 3                | 3                | 63         | M          |
| A871            | 0.185        | 0.04         | 0.145            | 31.7     | 3                | 3                | 58         | F          |
| A872            | 0.284        | 0.088        | 0.196            | 39.9     | 4                | 4                | 20         | M          |
| A873            | 0.187        | 0.048        | 0.139            | 30.8     | 4                | 4                | 53         | F          |
| A874            | 0.236        | 0.07         | 0.166            | 35.1     | 4                | 4                | 70         | M          |
| A875            | 0.184        | 0.041        | 0.143            | 31.4     | 4                | 4                | 79         | F          |
| A876            | 0.207        | 0.063        | 0.144            | 31.6     | 3                | 3                | 43         | F          |
| A877            | 0.205        | 0.067        | 0.138            | 30.6     | 3                | 3                | 76         | M          |
| A878            | 0.324        | 0.051        | 0.273            | 52.2     | 4                | 4                | 53         | M          |
| A879            | 0.133        | 0.058        | 0.075            | 20.5     | 3                | 3                | 66         | F          |
| A880            | 0.199        | 0.056        | 0.143            | 31.4     | 4                | 4                | 44         | M          |
| A881            | 0.109        | 0.107        | 0.002            | 8.9      | 2                | 2                | 73         | F          |
| A882            | 0.256        | 0.085        | 0.171            | 35.9     | 4                | 4                | 53         | F          |
| A883            | 0.308        | 0.102        | 0.206            | 41.5     | 4                | 4                | 52         | F          |
| A884            | 0.174        | 0.095        | 0.079            | 21.2     | 3                | 3                | 13         | F          |
| A885            | 0.281        | 0.069        | 0.212            | 42.4     | 4                | 4                | 36         | F          |
| A886            | 0.118        | 0.11         | 0.008            | 9.8      | 2                | 2                | 50         | F          |
| A887            | 0.269        | 0.106        | 0.163            | 34.6     | 3                | 3                | 6y6m       | F          |
| A888            | 0.154        | 0.104        | 0.05             | 16.5     | 3                | 3                | 49         | F          |
| A889            | 0.073        | 0.069        | 0.004            | 9.2      | 1                | 1                | 50         | F          |
| A890            | 0.29         | 0.15         | 0.14             | 30.9     | 4                | 4                | 61         | F          |
| A891            | 0.276        | 0.065        | 0.211            | 42.3     | 4                | 4                | 28         | F          |
| A892            | 0.277        | 0.075        | 0.202            | 40.8     | 4                | 4                | 60         | M          |
| A893            | 0.191        | 0.051        | 0.14             | 30.9     | 3                | 3                | 60         | F          |
| A894            | 0.185        | 0.048        | 0.137            | 30.5     | 3                | 3                | 62         | F          |
| A895            | 0.263        | 0.071        | 0.192            | 39.2     | 4                | 4                | 24         | F          |
| A896            | 0.536        | 0.057        | 0.479            | 85.1     | 4                | 4                | 23         | F          |
| A897            | 0.408        | 0.073        | 0.335            | 62.1     | 4                | 4                | 45         | F          |
| A898            | 0.103        | 0.1          | 0.003            | 9.0      | 2                | 2                | 15         | M          |
| A899            | 0.404        | 0.201        | 0.203            | 41.0     | 4                | 4                | 31         | F          |
| A900            | 0.17         | 0.143        | 0.027            | 12.9     | 3                | 3                | 56         | F          |
| A901            | 0.325        | 0.125        | 0.2              | 40.5     | 4                | 4                | 57         | F          |

|                 |              |              |                  |          |                  |                  |            |            |
|-----------------|--------------|--------------|------------------|----------|------------------|------------------|------------|------------|
| A902            | 0.214        | 0.071        | 0.143            | 31.4     | 3                | 3                | 38         | F          |
| A903            | 0.165        | 0.06         | 0.105            | 25.3     | 3                | 3                | 18         | M          |
| A904            | 0.545        | 0.125        | 0.42             | 75.7     | 4                | 4                | 36         | F          |
| A905            | 0.502        | 0.36         | 0.142            | 31.3     | 4                | 4                | 31         | F          |
| A906            | 0.387        | 0.2          | 0.187            | 38.4     | 4                | 4                | 34         | F          |
| A907            | 0.189        | 0.041        | 0.148            | 32.2     | 4                | 4                | 50         | M          |
| A908            | 0.155        | 0.098        | 0.057            | 17.7     | 4                | 4                | 55         | F          |
| A909            | 0.322        | 0.086        | 0.236            | 46.3     | 4                | 4                | 52         | F          |
| A910            | 0.31         | 0.077        | 0.233            | 45.8     | 4                | 4                | 57         | F          |
| A911            | 0.27         | 0.095        | 0.175            | 36.5     | 4                | 4                | 65         | F          |
| A912            | 0.268        | 0.081        | 0.187            | 38.4     | 4                | 4                | 10         | M          |
| A913            | 0.122        | 0.057        | 0.065            | 18.9     | 4                | 4                | 1 4\12     | M          |
| A914            | 0.33         | 0.103        | 0.227            | 44.8     | 4                | 4                | 35         | M          |
| A915            | 0.533        | 0.134        | 0.399            | 72.3     | 4                | 4                | 34         | F          |
| A916            | 0.152        | 0.084        | 0.068            | 19.4     | 3                | 3                | 74         | F          |
| A917            | 0.23         | 0.089        | 0.141            | 31.1     | 3                | 3                | 62         | F          |
| A918            | 0.303        | 0.125        | 0.178            | 37.0     | 3                | 3                | 50         | F          |
| A919            | 0.207        | 0.066        | 0.141            | 31.1     | 3                | 3                | 42         | F          |
| A920            | 0.19         | 0.047        | 0.143            | 31.4     | 3                | 3                | 84         | M          |
| A921            | 0.25         | 0.07         | 0.18             | 37.3     | 4                | 4                | 48         | F          |
| A922            | 0.277        | 0.11         | 0.167            | 35.3     | 4                | 4                | 47         | M          |
| A923            | 0.268        | 0.093        | 0.175            | 36.5     | 4                | 4                | 52         | F          |
| A924            | 0.308        | 0.119        | 0.189            | 38.8     | 4                | 4                | 41         | F          |
| A925            | 0.388        | 0.091        | 0.297            | 56.0     | 4                | 4                | 60         | F          |
| A926            | 0.245        | 0.1          | 0.145            | 31.7     | 3                | 3                | 3 10\12    | F          |
| A927            | 0.152        | 0.089        | 0.063            | 18.6     | 3                | 3                | 23         | F          |
| A928            | 0.185        | 0.046        | 0.139            | 30.8     | 3                | 3                | 50         | F          |
| A929            | 0.186        | 0.048        | 0.138            | 30.6     | 4                | 4                | 6          | M          |
| A930            | 0.196        | 0.057        | 0.139            | 30.8     | 3                | 3                | 36         | F          |
| A931            | 0.314        | 0.115        | 0.199            | 40.4     | 4                | 4                | 1y3m       | M          |
| A932            | 0.514        | 0.128        | 0.386            | 70.3     | 4                | 4                | 48         | M          |
| A933            | 0.225        | 0.084        | 0.141            | 31.1     | 3                | 3                | 34         | M          |
| A934            | 0.272        | 0.122        | 0.15             | 32.5     | 3                | 3                | 59         | F          |
| A935            | 0.22         | 0.081        | 0.139            | 30.8     | 3                | 3                | 17         | F          |
| A936            | 0.172        | 0.114        | 0.058            | 17.8     | 3                | 3                | 54         | M          |
| A937            | 0.14         | 0.102        | 0.038            | 14.6     | 3                | 3                | 56         | F          |
| A938            | 0.167        | 0.135        | 0.032            | 13.7     | 3                | 3                | 44         | F          |
| A939            | 0.171        | 0.106        | 0.065            | 18.9     | 4                | 4                | 53         | F          |
| A940            | 0.145        | 0.123        | 0.022            | 12.1     | 3                | 3                | 50         | F          |
| A941            | 0.294        | 0.108        | 0.186            | 38.3     | 3                | 4                | 23         | F          |
| A942            | 0.39         | 0.146        | 0.244            | 47.6     | 4                | 4                | 54         | M          |
| A943            | 0.13         | 0.096        | 0.034            | 14.0     | 3                | 3                | 15         | F          |
| A944            | 0.118        | 0.11         | 0.008            | 9.8      | 2                | 2                | 50         | F          |
|                 |              |              |                  |          |                  |                  |            |            |
|                 |              |              |                  |          |                  |                  |            |            |
| <b>Plate 13</b> |              |              |                  |          |                  |                  |            |            |
| <b>Sample</b>   | <b>450nm</b> | <b>630nm</b> | <b>450-630nm</b> | <b>%</b> | <b>Colour O1</b> | <b>Colour O2</b> | <b>Age</b> | <b>Sex</b> |
| Blank           | 0.029        | 0.02         | 0.009            |          | No               | No               |            |            |
| Inactivated     | 0.092        | 0.052        | 0.04             |          | No               | No               |            |            |
| Sub negative    | 0.162        | 0.125        | 0.037            |          | No               | No               |            |            |
| 100%            | 0.656        | 0.081        | 0.575            |          | 5                | 5                |            |            |
| 60%             | 0.333        | 0.054        | 0.279            |          | 4                | 4                |            |            |
| 30%             | 0.142        | 0.034        | 0.108            |          | 3                | 3                |            |            |
| 10%             | 0.108        | 0.045        | 0.063            |          | 2                | 2                |            |            |
| A945            | 0.341        | 0.048        | 0.293            | 56.1     | 4                | 4                | 10         | F          |
| A946            | 0.647        | 0.351        | 0.296            | 56.6     | 4                | 4                | 60         | M          |
| A947            | 0.539        | 0.04         | 0.499            | 90.4     | 5                | 5                | 20         | M          |
| A948            | 0.18         | 0.039        | 0.141            | 30.8     | 3                | 4                | 37         | F          |
| A949            | 0.138        | 0.07         | 0.068            | 18.7     | 3                | 4                | 29         | F          |
| A950            | 0.285        | 0.061        | 0.224            | 44.6     | 3                | 3                | 25         | M          |
| A951            | 0.195        | 0.036        | 0.159            | 33.8     | 4                | 4                | 30         | F          |
| A952            | 0.39         | 0.128        | 0.262            | 51.0     | 4                | 4                | 36         | F          |
| A953            | 0.512        | 0.095        | 0.417            | 76.7     | 5                | 5                | 42         | F          |
| A954            | 0.61         | 0.142        | 0.468            | 85.2     | 5                | 5                | 40         | F          |
| A955            | 0.422        | 0.036        | 0.386            | 71.6     | 4                | 4                | 59         | F          |
| A956            | 0.335        | 0.026        | 0.309            | 58.8     | 4                | 4                | 1y4m       | M          |
| A957            | 0.189        | 0.044        | 0.145            | 31.5     | 4                | 4                | 51         | F          |
| A958            | 0.153        | 0.014        | 0.139            | 30.5     | 3                | 3                | 62         | F          |
| A959            | 0.347        | 0.195        | 0.152            | 32.7     | 3                | 3                | 47         | M          |



|       |       |       |       |       |   |   |      |   |
|-------|-------|-------|-------|-------|---|---|------|---|
| A960  | 0.211 | 0.032 | 0.179 | 37.1  | 3 | 3 | 51   | F |
| A961  | 0.303 | 0.022 | 0.281 | 54.1  | 3 | 3 | 13   | M |
| A962  | 0.603 | 0.199 | 0.404 | 74.6  | 4 | 4 | 13   | F |
| A963  | 0.492 | 0.041 | 0.451 | 82.4  | 4 | 4 | 62   | M |
| A964  | 0.211 | 0.073 | 0.138 | 30.3  | 3 | 4 | 60   | F |
| A965  | 0.139 | 0.061 | 0.078 | 20.3  | 3 | 4 | 62   | M |
| A966  | 0.1   | 0.095 | 0.005 | 8.2   | 1 | 1 | 62   | F |
| A967  | 0.54  | 0.262 | 0.278 | 53.6  | 4 | 4 | 64   | F |
| A968  | 0.334 | 0.06  | 0.274 | 53.0  | 4 | 4 | 30   | F |
| A969  | 0.131 | 0.062 | 0.069 | 18.8  | 3 | 3 | 50   | F |
| A970  | 0.184 | 0.045 | 0.139 | 30.5  | 3 | 3 | 60   | F |
| A971  | 0.252 | 0.095 | 0.157 | 33.5  | 3 | 4 | 50   | F |
| A972  | 0.101 | 0.093 | 0.008 | 8.7   | 1 | 1 | 63   | F |
| A973  | 0.119 | 0.023 | 0.096 | 23.3  | 3 | 4 | 23   | F |
| A974  | 0.374 | 0.107 | 0.267 | 51.8  | 3 | 4 | 73   | F |
| A975  | 0.184 | 0.033 | 0.151 | 32.5  | 3 | 3 | 52   | F |
| A976  | 0.234 | 0.049 | 0.185 | 38.1  | 3 | 3 | 53   | F |
| A977  | 0.409 | 0.27  | 0.139 | 30.5  | 3 | 4 | 62   | F |
| A978  | 0.164 | 0.023 | 0.141 | 30.8  | 3 | 3 | 31   | F |
| A979  | 0.321 | 0.172 | 0.149 | 32.2  | 3 | 4 | 65   | F |
| A980  | 0.243 | 0.095 | 0.148 | 32.0  | 3 | 3 | 38   | M |
| A981  | 0.204 | 0.056 | 0.148 | 32.0  | 4 | 4 | 34   | F |
| A982  | 0.074 | 0.069 | 0.005 | 8.2   | 2 | 2 | 70   | F |
| A983  | 0.175 | 0.033 | 0.142 | 31.0  | 3 | 3 | 23   | F |
| A984  | 0.213 | 0.073 | 0.14  | 30.7  | 3 | 3 | 60   | F |
| A985  | 0.519 | 0.167 | 0.352 | 65.9  | 3 | 4 | 45   | F |
| A986  | 0.754 | 0.287 | 0.467 | 85.1  | 5 | 5 | 66   | F |
| A987  | 0.077 | 0.071 | 0.006 | 8.4   | 2 | 2 | 61   | F |
| A988  | 0.26  | 0.076 | 0.184 | 38.0  |   | 3 | 68   | F |
| A989  | 0.257 | 0.11  | 0.147 | 31.8  | 4 | 4 | 43   | F |
| A990  | 0.38  | 0.069 | 0.311 | 59.1  | 4 | 4 | 60   | F |
| A991  | 0.283 | 0.102 | 0.181 | 37.5  | 3 | 3 | 71   | F |
| A992  | 0.378 | 0.199 | 0.179 | 37.1  | 4 | 4 | 57   | F |
| A993  | 0.433 | 0.137 | 0.296 | 56.6  | 4 | 4 | 53   | F |
| A994  | 0.486 | 0.106 | 0.38  | 70.6  | 4 | 4 | 64   | M |
| A995  | 0.236 | 0.039 | 0.197 | 40.1  | 3 | 4 | 57   | F |
| A996  | 0.166 | 0.019 | 0.147 | 31.8  | 3 | 3 | 52   | F |
| A997  | 0.21  | 0.045 | 0.165 | 34.8  | 4 | 4 | 47   | F |
| A998  | 0.221 | 0.081 | 0.14  | 30.7  | 3 | 3 | 55   | F |
| A999  | 0.503 | 0.105 | 0.398 | 73.6  | 4 | 4 | 70   | M |
| A1000 | 0.333 | 0.105 | 0.228 | 45.3  | 3 | 3 | 1y2m | M |
| A1001 | 0.394 | 0.082 | 0.312 | 59.3  | 3 | 4 | 50   | F |
| A1002 | 0.455 | 0.287 | 0.168 | 35.3  | 3 | 3 | 31   | F |
| A1003 | 0.374 | 0.074 | 0.3   | 57.3  | 3 | 4 | 50   | M |
| A1004 | 0.22  | 0.062 | 0.158 | 33.7  | 3 | 4 | 21   | F |
| A1005 | 0.164 | 0.01  | 0.154 | 33.0  | 4 | 4 | 73   | M |
| A1006 | 0.516 | 0.137 | 0.379 | 70.4  | 5 | 5 | 47   | F |
| A1007 | 0.555 | 0.185 | 0.37  | 68.9  | 4 | 4 | 24   | M |
| A1008 | 0.47  | 0.087 | 0.383 | 71.1  | 5 | 5 | 45   | F |
| A1009 | 0.516 | 0.082 | 0.434 | 79.6  | 5 | 5 | 36   | F |
| A1010 | 0.659 | 0.085 | 0.574 | 102.9 | 5 | 5 | 68   | M |
| A1011 | 0.679 | 0.07  | 0.609 | 108.7 | 6 | 6 | 72   | F |
| A1012 | 0.598 | 0.064 | 0.534 | 96.2  | 5 | 5 | 51   | F |
| A1013 | 0.32  | 0.046 | 0.274 | 53.0  | 4 | 4 | 19   | M |
| A1014 | 0.425 | 0.121 | 0.304 | 57.9  | 4 | 4 | 6    | F |
| A1015 | 0.347 | 0.074 | 0.273 | 52.8  | 4 | 4 | 62   | F |
| A1016 | 0.49  | 0.07  | 0.42  | 77.2  | 4 | 4 | 56   | M |
| A1017 | 0.502 | 0.071 | 0.431 | 79.1  | 4 | 4 | 42   | F |
| A1018 | 0.598 | 0.068 | 0.53  | 95.5  | 5 | 5 | 38   | F |
