# Supplementary material for: Prevalence of G6PD deficiency in selected populations from two previously high malaria endemic areas of Sri Lanka
Source: PubMed Central journal article supplement (PMC5289554; doi:10.1371/journal.pone.0171208), 2017-02-02
Supplement: pone.0171208.s002.pdf [file pone.0171208.s002.pdf]

| Sample         | 450nm        | 630nm        | 450-630nm    | %     | Colour O1 | Colour O2 | Sex | Age |
|----------------|--------------|--------------|--------------|-------|-----------|-----------|-----|-----|
| <b>Plate 1</b> |              |              |              |       |           |           |     |     |
| Blank          | <b>0</b>     | <b>0</b>     | <b>0</b>     |       | <b>No</b> | <b>No</b> |     |     |
| Sub Negative   | <b>0.152</b> | <b>0.102</b> | <b>0.05</b>  |       | <b>No</b> | <b>No</b> |     |     |
| Inactivated    | <b>0.322</b> | <b>0.29</b>  | <b>0.032</b> |       | <b>no</b> | <b>No</b> |     |     |
| 100            | <b>1.767</b> | <b>0.359</b> | <b>1.408</b> |       | <b>6</b>  | <b>6</b>  |     |     |
| 60             | <b>0.971</b> | <b>0.152</b> | <b>0.819</b> |       | <b>6</b>  | <b>6</b>  |     |     |
| 30             | <b>0.611</b> | <b>0.176</b> | <b>0.435</b> |       | <b>4</b>  | <b>4</b>  |     |     |
| 10             | <b>0.43</b>  | <b>0.175</b> | <b>0.255</b> |       | <b>3</b>  | <b>3</b>  |     |     |
| 1              | 1.4          | 0.483        | <b>0.917</b> | 64.36 | 6         | 6         | F   | 60  |
| 2              | 0.542        | 0.054        | <b>0.488</b> | 31.54 | 5         | 5         | F   | 42  |
| 3              | 0.804        | 0.179        | <b>0.625</b> | 42.02 | 5         | 5         | F   | 28  |
| 4              | 0.735        | 0.053        | <b>0.682</b> | 46.39 | 5         | 5         | F   | 19  |
| 5              | 1.527        | 0.427        | <b>1.1</b>   | 78.36 | 6         | 6         | F   | 35  |
| 6              | 0.751        | 0.068        | <b>0.683</b> | 46.46 | 6         | 5         | F   | 63  |
| 7              | 1.078        | 0.396        | <b>0.682</b> | 46.39 | 5         | 5         | F   | 52  |
| 8              | 0.596        | 0.051        | <b>0.545</b> | 35.90 | 5         | 5         | F   | 43  |
| 9              | 0.588        | 0.024        | <b>0.564</b> | 37.36 | 5         | 5         | F   | 38  |
| 10             | 0.747        | 0.033        | <b>0.714</b> | 48.83 | 5         | 5         | M   | 15  |
| 11             | 0.493        | 0.019        | <b>0.474</b> | 30.47 | 5         | 4         | M   | 74  |
| 12             | 0.62         | 0.027        | <b>0.593</b> | 39.58 | 4         | 4         | F   | 70  |
| 13             | 0.747        | 0.216        | <b>0.531</b> | 34.83 | 5         | 5         | F   | 60  |
| 14             | 1.596        | 0.425        | <b>1.171</b> | 83.79 | 6         | 6         | F   | 50  |
| 15             | 1.065        | 0.402        | <b>0.663</b> | 44.93 | 6         | 6         | F   | 68  |
| 16             | 0.913        | 0.096        | <b>0.817</b> | 56.71 | 5         | 6         | F   | 55  |
| 17             | 0.992        | 0.401        | <b>0.591</b> | 39.42 | 5         | 5         | F   | 57  |
| 18             | 0.833        | 0.055        | <b>0.778</b> | 53.73 | 5         | 5         | M   | 69  |
| 19             | 0.784        | 0.03         | <b>0.754</b> | 51.89 | 5         | 5         | F   | 53  |
| 20             | 0.497        | 0.024        | <b>0.473</b> | 30.40 | 4         | 4         | M   | 83  |
| 21             | 0.611        | 0.107        | <b>0.504</b> | 32.77 | 5         | 5         | F   | 57  |
| 22             | 1.347        | 0.517        | <b>0.83</b>  | 57.71 | 6         | 6         | M   | 55  |
| 23             | 1.1          | 0.537        | <b>0.563</b> | 37.28 | 5         | 5         | F   | 59  |
| 24             | 0.979        | 0.101        | <b>0.878</b> | 61.38 | 6         | 6         | M   | 45  |
| 25             | 1.155        | 0.465        | <b>0.69</b>  | 47.00 | 6         | 6         | M   | 21  |
| 26             | 0.613        | 0.043        | <b>0.57</b>  | 37.82 | 5         | 5         | F   | 16  |
| 27             | 0.59         | 0.024        | <b>0.566</b> | 37.51 | 5         | 5         | F   | 64  |
| 28             | 0.367        | 0.146        | <b>0.221</b> | 11.12 | 2         | 2         | M   | 39  |
| 29             | 0.948        | 0.075        | <b>0.873</b> | 61.00 | 6         | 6         | F   | 23  |
| 30             | 0.712        | 0.124        | <b>0.588</b> | 39.19 | 5         | 5         | F   | 73  |
| 31             | 0.542        | 0.053        | <b>0.489</b> | 31.62 | 5         | 5         | M   | 59  |
| 32             | 1.372        | 0.521        | <b>0.851</b> | 59.31 | 6         | 6         | F   | 72  |
| 33             | 1.624        | 0.464        | <b>1.16</b>  | 82.95 | 6         | 6         | M   | 20  |
| 34             | 0.66         | 0.082        | <b>0.578</b> | 38.43 | 5         | 5         | M   | 59  |

|    |       |       |              |        |   |   |   |    |
|----|-------|-------|--------------|--------|---|---|---|----|
| 35 | 1.282 | 0.259 | <b>1.023</b> | 72.47  | 6 | 6 | M | 70 |
| 36 | 0.331 | 0.053 | <b>0.278</b> | 15.48  | 3 | 3 | F | 83 |
| 37 | 0.507 | 0.024 | <b>0.483</b> | 31.16  | 4 | 4 | M | 63 |
| 38 | 1.074 | 0.596 | <b>0.478</b> | 30.78  | 4 | 4 | F | 70 |
| 39 | 0.492 | 0.021 | <b>0.471</b> | 30.24  | 4 | 4 | M | 54 |
| 40 | 0.324 | 0.041 | <b>0.283</b> | 15.86  | 3 | 3 | F | 66 |
| 41 | 0.737 | 0.042 | <b>0.695</b> | 47.38  | 4 | 4 | M | 58 |
| 42 | 0.659 | 0.1   | <b>0.559</b> | 36.98  | 4 | 4 | F | 56 |
| 43 | 0.588 | 0.036 | <b>0.552</b> | 36.44  | 4 | 4 | F | 36 |
| 44 | 0.834 | 0.058 | <b>0.776</b> | 53.58  | 4 | 4 | F | 16 |
| 45 | 0.514 | 0.042 | <b>0.472</b> | 30.32  | 4 | 4 | M | 32 |
| 46 | 1.874 | 0.442 | <b>1.432</b> | 103.76 | 6 | 6 | F | 42 |
| 47 | 0.961 | 0.087 | <b>0.874</b> | 61.07  | 6 | 6 | F | 56 |
| 48 | 1.046 | 0.134 | <b>0.912</b> | 63.98  | 6 | 6 | M | 56 |
| 49 | 0.897 | 0.053 | <b>0.844</b> | 58.78  | 6 | 6 | F | 18 |
| 50 | 0.955 | 0.432 | <b>0.523</b> | 34.22  | 4 | 4 | F | 69 |
| 51 | 0.927 | 0.124 | <b>0.803</b> | 55.64  | 5 | 5 | M | 58 |
| 52 | 0.542 | 0.069 | <b>0.473</b> | 30.40  | 5 | 4 | F | 75 |
| 53 | 0.537 | 0.047 | <b>0.49</b>  | 31.70  | 4 | 4 | F | 72 |
| 54 | 0.986 | 0.158 | <b>0.828</b> | 57.55  | 6 | 5 | F | 48 |
| 55 | 0.514 | 0.045 | <b>0.469</b> | 30.09  | 4 | 4 | M | 62 |
| 56 | 1.897 | 0.085 | <b>1.812</b> | 132.83 | 6 | 6 | F | 49 |
| 57 | 1.29  | 0.07  | <b>1.22</b>  | 87.54  | 6 | 6 | F | 13 |
| 58 | 1.036 | 0.132 | <b>0.904</b> | 63.37  | 6 | 6 | F | 14 |
| 59 | 0.786 | 0.034 | <b>0.752</b> | 51.74  | 5 | 5 | F | 59 |
| 60 | 0.701 | 0.045 | <b>0.656</b> | 44.40  | 5 | 5 | M | 60 |
| 61 | 0.522 | 0.05  | <b>0.472</b> | 30.32  | 4 | 4 | F | 53 |
| 62 | 0.58  | 0.102 | <b>0.478</b> | 30.78  | 4 | 4 | F | 43 |
| 63 | 1.04  | 0.086 | <b>0.954</b> | 67.19  | 6 | 6 | F | 60 |
| 64 | 0.71  | 0.089 | <b>0.621</b> | 41.72  | 4 | 4 | F | 54 |
| 65 | 1.283 | 0.332 | <b>0.951</b> | 66.96  | 5 | 4 | F | 60 |
| 66 | 0.667 | 0.072 | <b>0.595</b> | 39.73  | 4 | 4 | F | 49 |
| 67 | 0.497 | 0.013 | <b>0.484</b> | 31.24  | 3 | 3 | F | 66 |
| 68 | 0.312 | 0.044 | <b>0.268</b> | 14.71  | 3 | 3 | F | 46 |
| 69 | 0.695 | 0.079 | <b>0.616</b> | 41.34  | 4 | 4 | F | 77 |
| 70 | 0.791 | 0.305 | <b>0.486</b> | 31.39  | 4 | 4 | F | 57 |
| 71 | 0.622 | 0.126 | <b>0.496</b> | 32.16  | 5 | 5 | F | 73 |
| 72 | 0.898 | 0.117 | <b>0.781</b> | 53.96  | 5 | 5 | F | 41 |
| 73 | 0.607 | 0.104 | <b>0.503</b> | 32.69  | 4 | 4 | F | 53 |
| 74 | 0.657 | 0.053 | <b>0.604</b> | 40.42  | 4 | 4 | F | 63 |
| 75 | 0.869 | 0.044 | <b>0.825</b> | 57.32  | 4 | 4 | F | 74 |
| 76 | 0.626 | 0.072 | <b>0.554</b> | 36.59  | 4 | 4 | M | 58 |
| 77 | 0.544 | 0.024 | <b>0.52</b>  | 33.99  | 4 | 4 | F | 60 |

|                |              |              |              |        |           |           |   |    |
|----------------|--------------|--------------|--------------|--------|-----------|-----------|---|----|
| 78             | 1.053        | 0.214        | <b>0.839</b> | 58.40  | 6         | 6         | F | 64 |
| 79             | 0.503        | 0.034        | <b>0.469</b> | 30.09  | 4         | 4         | F | 69 |
| 80             | 0.549        | 0.075        | <b>0.474</b> | 30.47  | 4         | 4         | F | 63 |
| 81             | 1.118        | 0.332        | <b>0.786</b> | 54.34  | 5         | 5         | F | 48 |
| 82             | 0.792        | 0.088        | <b>0.704</b> | 48.07  | 4         | 4         | M | 64 |
| 83             | 1.223        | 0.335        | <b>0.888</b> | 62.14  | 5         | 5         | M | 31 |
| 84             | 0.883        | 0.042        | <b>0.841</b> | 58.55  | 5         | 5         | F | 56 |
| <b>Plate 2</b> |              |              |              |        |           |           |   |    |
| Blank          | <b>0.023</b> | <b>0</b>     | <b>0.023</b> |        | <b>No</b> | <b>No</b> |   |    |
| Sub Negative   | <b>0.139</b> | <b>0.101</b> | <b>0.038</b> |        | <b>NO</b> | <b>No</b> |   |    |
| Inactivated    | <b>0.144</b> | <b>0.113</b> | <b>0.031</b> |        | <b>no</b> | <b>No</b> |   |    |
| 100            | <b>1.148</b> | <b>0.059</b> | <b>1.089</b> |        | <b>6</b>  | <b>6</b>  |   |    |
| 60             | <b>0.785</b> | <b>0.091</b> | <b>0.694</b> |        | <b>4</b>  | <b>4</b>  |   |    |
| 30             | <b>0.385</b> | <b>0.064</b> | <b>0.321</b> |        | <b>3</b>  | <b>3</b>  |   |    |
| 10             | <b>0.374</b> | <b>0.085</b> | <b>0.289</b> |        | <b>3</b>  | <b>3</b>  |   |    |
| 85             | 0.744        | 0.057        | <b>0.687</b> | 59.12  | 5         | 5         | F | 64 |
| 86             | 1.064        | 0.539        | <b>0.525</b> | 42.47  | 5         | 5         | F | 63 |
| 87             | 1.316        | 0.461        | <b>0.855</b> | 76.38  | 5         | 5         | F | 14 |
| 88             | 0.369        | 0.051        | <b>0.318</b> | 21.21  | 3         | 3         | M | 58 |
| 89             | 0.68         | 0.156        | <b>0.524</b> | 42.37  | 4         | 4         | M | 40 |
| 90             | 0.456        | 0.014        | <b>0.442</b> | 33.95  | 3         | 3         | F | 34 |
| 91             | 0.42         | 0.012        | <b>0.408</b> | 30.45  | 3         | 3         | F | 60 |
| 92             | 0.354        | 0.119        | <b>0.235</b> | 12.68  | 3         | 3         | F | 74 |
| 93             | 0.889        | 0.471        | <b>0.418</b> | 31.48  | 4         | 4         | M | 69 |
| 94             | 0.508        | 0.018        | <b>0.49</b>  | 38.88  | 3         | 3         | F | 68 |
| 95             | 0.743        | 0.078        | <b>0.665</b> | 56.86  | 5         | 5         | F | 62 |
| 96             | 0.49         | 0.019        | <b>0.471</b> | 36.93  | 4         | 4         | F | 55 |
| 97             | 0.66         | 0.121        | <b>0.539</b> | 43.91  | 5         | 4         | F | 60 |
| 98             | 0.812        | 0.126        | <b>0.686</b> | 59.02  | 5         | 4         | F | 38 |
| 99             | 0.628        | 0.071        | <b>0.557</b> | 45.76  | 5         | 4         | F | 53 |
| 100            | 0.614        | 0.054        | <b>0.56</b>  | 46.07  | 4         | 4         | F | 47 |
| 101            | 0.315        | 0.022        | <b>0.293</b> | 18.64  | 3         | 3         | F | 50 |
| 102            | 0.825        | 0.23         | <b>0.595</b> | 49.67  | 5         | 5         | F | 52 |
| 103            | 1.714        | 0.164        | <b>1.55</b>  | 147.79 | 6         | 6         | F | 43 |
| 104            | 1.337        | 0.062        | <b>1.275</b> | 119.53 | 6         | 6         | M | 59 |
| 105            | 0.537        | 0.109        | <b>0.428</b> | 32.51  | 4         | 4         | F | 60 |
| 106            | 0.997        | 0.137        | <b>0.86</b>  | 76.89  | 4         | 4         | F | 44 |
| 107            | 1.072        | 0.047        | <b>1.025</b> | 93.85  | 4         | 4         | F | 44 |
| 108            | 0.473        | 0.053        | <b>0.42</b>  | 31.69  | 3         | 3         | F | 57 |
| 109            | 0.669        | 0.054        | <b>0.615</b> | 51.72  | 3         | 3         | F | 55 |
| 110            | 1.405        | 0.097        | <b>1.308</b> | 122.92 | 5         | 5         | F | 42 |
| 111            | 1.848        | 0.456        | <b>1.392</b> | 131.55 | 5         | 5         | F | 56 |
| 112            | 0.518        | 0.085        | <b>0.433</b> | 33.02  | 4         | 4         | F | 60 |

|     |       |       |              |        |   |   |   |      |
|-----|-------|-------|--------------|--------|---|---|---|------|
| 113 | 1.558 | 0.254 | <b>1.304</b> | 122.51 | 5 | 5 | F | 23   |
| 114 | 0.805 | 0.08  | <b>0.725</b> | 63.02  | 4 | 4 | F | 31   |
| 115 | 0.535 | 0.028 | <b>0.507</b> | 40.62  | 4 | 4 | F | 54   |
| 116 | 0.82  | 0.261 | <b>0.559</b> | 45.97  | 4 | 4 | M | 66   |
| 117 | 0.888 | 0.459 | <b>0.429</b> | 32.61  | 4 | 4 | F | 63   |
| 118 | 0.613 | 0.061 | <b>0.552</b> | 45.25  | 4 | 4 | F | 47   |
| 119 | 0.423 | 0.016 | <b>0.407</b> | 30.35  | 4 | 4 | F | 3y6m |
| 120 | 0.836 | 0.171 | <b>0.665</b> | 56.86  | 4 | 5 | F | 52   |
| 121 | 0.693 | 0.096 | <b>0.597</b> | 49.87  | 5 | 5 | F | 64   |
| 122 | 1.367 | 0.081 | <b>1.286</b> | 120.66 | 6 | 6 | M | 79   |
| 123 | 0.765 | 0.044 | <b>0.721</b> | 62.61  | 5 | 5 | M | 65   |
| 124 | 0.98  | 0.055 | <b>0.925</b> | 83.57  | 5 | 5 | F | 53   |
| 125 | 0.834 | 0.083 | <b>0.751</b> | 65.69  | 5 | 5 | F | 35   |
| 126 | 1.624 | 0.125 | <b>1.499</b> | 142.55 | 6 | 6 | F | 58   |
| 127 | 0.736 | 0.033 | <b>0.703</b> | 60.76  | 5 | 5 | F | 34   |
| 128 | 0.495 | 0.037 | <b>0.458</b> | 35.59  | 5 | 5 | F | 42   |
| 129 | 0.779 | 0.152 | <b>0.627</b> | 52.95  | 5 | 5 | F | 47   |
| 130 | 0.51  | 0.086 | <b>0.424</b> | 32.10  | 5 | 4 | F | 70   |
| 131 | 0.852 | 0.073 | <b>0.779</b> | 68.57  | 5 | 5 | F | 53   |
| 132 | 0.952 | 0.082 | <b>0.87</b>  | 77.92  | 5 | 5 | F | 70   |
| 133 | 0.889 | 0.073 | <b>0.816</b> | 72.37  | 5 | 5 | F | 60   |
| 134 | 0.901 | 0.116 | <b>0.785</b> | 69.19  | 5 | 5 | F | 45   |
| 135 | 0.65  | 0.028 | <b>0.622</b> | 52.44  | 5 | 5 | F | 76   |
| 136 | 0.783 | 0.025 | <b>0.758</b> | 66.41  | 5 | 5 | F | 63   |
| 137 | 0.429 | 0.022 | <b>0.407</b> | 30.35  | 4 | 3 | F | 63   |
| 138 | 0.343 | 0.029 | <b>0.314</b> | 20.80  | 3 | 2 | F | 75   |
| 139 | 0.476 | 0.065 | <b>0.411</b> | 30.76  | 3 | 3 | F | 68   |
| 140 | 0.376 | 0.112 | <b>0.264</b> | 15.66  | 2 | 2 | F | 51   |
| 141 | 0.73  | 0.088 | <b>0.642</b> | 54.50  | 4 | 4 | F | 68   |
| 142 | 0.586 | 0.064 | <b>0.522</b> | 42.17  | 4 | 4 | M | 67   |
| 143 | 1.37  | 0.487 | <b>0.883</b> | 79.26  | 4 | 4 | F | 64   |
| 144 | 1.016 | 0.439 | <b>0.577</b> | 47.82  | 4 | 4 | F | 58   |
| 145 | 0.666 | 0.066 | <b>0.6</b>   | 50.18  | 4 | 4 | F | 50   |
| 146 | 0.508 | 0.102 | <b>0.406</b> | 30.25  | 3 | 3 | F | 69   |
| 147 | 0.967 | 0.144 | <b>0.823</b> | 73.09  | 4 | 4 | F | 72   |
| 148 | 0.446 | 0.026 | <b>0.42</b>  | 31.69  | 3 | 3 | F | 67   |
| 149 | 0.896 | 0.081 | <b>0.815</b> | 72.27  | 4 | 4 | F | 53   |
| 150 | 1.244 | 0.078 | <b>1.166</b> | 108.33 | 6 | 6 | F | 45   |
| 151 | 0.845 | 0.056 | <b>0.789</b> | 69.60  | 5 | 5 | M | 56   |
| 152 | 1.111 | 0.35  | <b>0.761</b> | 66.72  | 5 | 5 | F | 70   |
| 153 | 0.785 | 0.107 | <b>0.678</b> | 58.19  | 5 | 5 | F | 63   |
| 154 | 0.869 | 0.128 | <b>0.741</b> | 64.67  | 4 | 4 | F | 54   |
| 155 | 1.233 | 0.494 | <b>0.739</b> | 64.46  | 4 | 4 | M | 47   |

|                |              |              |              |        |           |           |   |    |
|----------------|--------------|--------------|--------------|--------|-----------|-----------|---|----|
| 156            | 0.751        | 0.092        | <b>0.659</b> | 56.24  | 4         | 4         | F | 52 |
| 157            | 0.942        | 0.055        | <b>0.887</b> | 79.67  | 4         | 4         | F | 77 |
| 158            | 0.49         | 0.036        | <b>0.454</b> | 35.18  | 4         | 4         | F | 20 |
| 159            | 1.316        | 0.455        | <b>0.861</b> | 77.00  | 4         | 4         | F | 20 |
| 160            | 0.577        | 0.077        | <b>0.5</b>   | 39.91  | 4         | 4         | F | 52 |
| 161            | 0.706        | 0.069        | <b>0.637</b> | 53.98  | 4         | 4         | M | 56 |
| 162            | 0.746        | 0.09         | <b>0.656</b> | 55.93  | 4         | 4         | F | 34 |
| 163            | 1.159        | 0.067        | <b>1.092</b> | 100.73 | 5         | 5         | F | 43 |
| 164            | 1.399        | 0.288        | <b>1.111</b> | 102.68 | 5         | 5         | F | 55 |
| 165            | 0.95         | 0.06         | <b>0.89</b>  | 79.98  | 5         | 5         | M | 35 |
| 166            | 0.883        | 0.06         | <b>0.823</b> | 73.09  | 5         | 5         | F | 65 |
| 167            | 0.315        | 0.055        | <b>0.26</b>  | 15.25  | 3         | 3         | F | 47 |
| 168            | 0.746        | 0.05         | <b>0.696</b> | 60.04  | 4         | 4         | F | 49 |
| <b>Plate 3</b> |              |              |              |        |           |           |   |    |
| Blank          | <b>0</b>     | <b>0</b>     | <b>0</b>     |        | <b>No</b> | <b>No</b> |   |    |
| Sub Negative   | <b>0.061</b> | <b>0.043</b> | <b>0.018</b> |        | <b>No</b> | <b>No</b> |   |    |
| Inactivated    | <b>0.095</b> | <b>0.071</b> | <b>0.024</b> |        | <b>No</b> | <b>No</b> |   |    |
| 100            | <b>1.221</b> | <b>0.043</b> | <b>1.178</b> |        | <b>5</b>  | <b>5</b>  |   |    |
| 60             | <b>0.832</b> | <b>0.05</b>  | <b>0.782</b> |        | <b>4</b>  | <b>4</b>  |   |    |
| 30             | <b>0.513</b> | <b>0.158</b> | <b>0.355</b> |        | <b>3</b>  | <b>3</b>  |   |    |
| 10             | <b>0.321</b> | <b>0.067</b> | <b>0.254</b> |        | <b>2</b>  | <b>2</b>  |   |    |
| 169            | 1.41         | 0.369        | <b>1.041</b> | 86.54  | 5         | 5         | M | 63 |
| 170            | 0.439        | 0.009        | <b>0.43</b>  | 30.55  | 4         | 4         | M | 76 |
| 171            | 1.036        | 0.041        | <b>0.995</b> | 82.32  | 5         | 5         | M | 50 |
| 172            | 0.618        | 0.033        | <b>0.585</b> | 44.75  | 5         | 4         | F | 52 |
| 173            | 0.775        | 0.171        | <b>0.604</b> | 46.50  | 4         | 4         | F | 62 |
| 174            | 0.685        | 0.053        | <b>0.632</b> | 49.06  | 4         | 4         | F | 54 |
| 175            | 0.54         | 0.037        | <b>0.503</b> | 37.24  | 4         | 4         | F | 61 |
| 176            | 0.962        | 0.232        | <b>0.73</b>  | 58.04  | 4         | 4         | M | 50 |
| 177            | 0.908        | 0.021        | <b>0.887</b> | 72.43  | 4         | 4         | M | 64 |
| 178            | 0.775        | 0.304        | <b>0.471</b> | 34.31  | 4         | 4         | F | 49 |
| 179            | 0.793        | 0.112        | <b>0.681</b> | 53.55  | 4         | 4         | F | 58 |
| 180            | 0.364        | 0.109        | <b>0.255</b> | 14.52  | 2         | 2         | F | 72 |
| 181            | 0.721        | 0.062        | <b>0.659</b> | 51.53  | 4         | 4         | F | 52 |
| 182            | 0.527        | 0.067        | <b>0.46</b>  | 33.30  | 4         | 4         | F | 60 |
| 183            | 0.456        | 0.026        | <b>0.43</b>  | 30.55  | 4         | 4         | F | 63 |
| 184            | 0.196        | 0.027        | <b>0.169</b> | 6.64   | 3         | 3         | F | 63 |
| 185            | 0.533        | 0.042        | <b>0.491</b> | 36.14  | 3         | 3         | M | 75 |
| 186            | 0.991        | 0.036        | <b>0.955</b> | 78.66  | 5         | 5         | M | 50 |
| 187            | 0.753        | 0.052        | <b>0.701</b> | 55.38  | 5         | 5         | M | 73 |
| 188            | 0.448        | 0.018        | <b>0.43</b>  | 30.55  | 4         | 4         | F | 39 |
| 189            | 0.987        | 0.201        | <b>0.786</b> | 63.17  | 6         | 6         | F | 77 |
| 190            | 1.476        | 0.37         | <b>1.106</b> | 92.49  | 5         | 5         | F | 56 |

|     |       |       |              |        |   |   |   |    |
|-----|-------|-------|--------------|--------|---|---|---|----|
| 191 | 0.921 | 0.06  | <b>0.861</b> | 70.04  | 5 | 5 | F | 53 |
| 192 | 0.943 | 0.294 | <b>0.649</b> | 50.62  | 4 | 4 | F | 51 |
| 193 | 1.197 | 0.561 | <b>0.636</b> | 49.43  | 4 | 4 | F | 54 |
| 194 | 1.11  | 0.047 | <b>1.063</b> | 88.55  | 5 | 5 | F | 49 |
| 195 | 0.811 | 0.033 | <b>0.778</b> | 62.44  | 5 | 5 | F | 53 |
| 196 | 1.428 | 0.122 | <b>1.306</b> | 110.82 | 6 | 6 | F | 36 |
| 197 | 0.691 | 0.035 | <b>0.656</b> | 51.26  | 4 | 4 | F | 63 |
| 198 | 0.595 | 0.066 | <b>0.529</b> | 39.62  | 3 | 3 | F | 64 |
| 199 | 0.993 | 0.087 | <b>0.906</b> | 74.17  | 5 | 5 | F | 48 |
| 200 | 0.74  | 0.053 | <b>0.687</b> | 54.10  | 4 | 4 | F | 64 |
| 201 | 1.054 | 0.129 | <b>0.925</b> | 75.91  | 4 | 4 | F | 70 |
| 202 | 0.562 | 0.072 | <b>0.49</b>  | 36.05  | 3 | 3 | M | 63 |
| 203 | 0.813 | 0.051 | <b>0.762</b> | 60.97  | 4 | 4 | F | 55 |
| 204 | 0.763 | 0.055 | <b>0.708</b> | 56.02  | 4 | 4 | M | 74 |
| 205 | 0.515 | 0.047 | <b>0.468</b> | 34.03  | 2 | 3 | F | 67 |
| 206 | 0.455 | 0.022 | <b>0.433</b> | 30.83  | 3 | 3 | F | 55 |
| 207 | 0.815 | 0.051 | <b>0.764</b> | 61.16  | 4 | 4 | F | 54 |
| 208 | 0.458 | 0.014 | <b>0.444</b> | 31.84  | 3 | 3 | F | 57 |
| 209 | 0.515 | 0.036 | <b>0.479</b> | 35.04  | 3 | 3 | F | 51 |
| 210 | 0.675 | 0.036 | <b>0.639</b> | 49.70  | 3 | 3 | F | 48 |
| 211 | 0.583 | 0.016 | <b>0.567</b> | 43.11  | 3 | 3 | M | 66 |
| 212 | 0.671 | 0.034 | <b>0.637</b> | 49.52  | 3 | 4 | F | 63 |
| 213 | 0.566 | 0.115 | <b>0.451</b> | 32.48  | 3 | 3 | F | 64 |
| 214 | 0.855 | 0.085 | <b>0.77</b>  | 61.71  | 5 | 5 | F | 62 |
| 215 | 0.994 | 0.477 | <b>0.517</b> | 38.52  | 4 | 4 | F | 40 |
| 216 | 0.733 | 0.06  | <b>0.673</b> | 52.82  | 4 | 4 | M | 52 |
| 217 | 0.674 | 0.161 | <b>0.513</b> | 38.16  | 4 | 4 | F | 65 |
| 218 | 0.572 | 0.121 | <b>0.451</b> | 32.48  | 4 | 4 | F | 62 |
| 219 | 0.531 | 0.102 | <b>0.429</b> | 30.46  | 3 | 3 | F | 56 |
| 220 | 0.811 | 0.297 | <b>0.514</b> | 38.25  | 4 | 4 | F | 46 |
| 221 | 1.185 | 0.186 | <b>0.999</b> | 82.69  | 5 | 5 | M | 56 |
| 222 | 0.95  | 0.122 | <b>0.828</b> | 67.02  | 5 | 5 | M | 38 |
| 223 | 0.722 | 0.079 | <b>0.643</b> | 50.07  | 5 | 5 | M | 64 |
| 224 | 0.892 | 0.273 | <b>0.619</b> | 47.87  | 5 | 5 | F | 59 |
| 225 | 0.441 | 0.01  | <b>0.431</b> | 30.64  | 3 | 3 | F | 70 |
| 226 | 0.781 | 0.078 | <b>0.703</b> | 55.57  | 5 | 5 | M | 38 |
| 227 | 0.599 | 0.165 | <b>0.434</b> | 30.92  | 3 | 3 | F | 70 |
| 228 | 0.755 | 0.161 | <b>0.594</b> | 45.58  | 4 | 4 | M | 45 |
| 229 | 0.518 | 0.083 | <b>0.435</b> | 31.01  | 3 | 3 | F | 55 |
| 230 | 0.483 | 0.051 | <b>0.432</b> | 30.74  | 3 | 3 | F | 56 |
| 231 | 0.501 | 0.07  | <b>0.431</b> | 30.64  | 3 | 3 | M | 58 |
| 232 | 1.212 | 0.422 | <b>0.79</b>  | 63.54  | 4 | 4 | F | 53 |
| 233 | 1.112 | 0.4   | <b>0.712</b> | 56.39  | 4 | 4 | F | 55 |

|                |              |              |               |       |           |           |   |    |
|----------------|--------------|--------------|---------------|-------|-----------|-----------|---|----|
| 234            | 0.682        | 0.079        | <b>0.603</b>  | 46.40 | 4         | 4         | F | 50 |
| 235            | 0.505        | 0.06         | <b>0.445</b>  | 31.93 | 3         | 3         | M | 72 |
| 236            | 0.439        | 0.013        | <b>0.426</b>  | 30.19 | 3         | 3         | M | 80 |
| 237            | 0.793        | 0.109        | <b>0.684</b>  | 53.83 | 4         | 4         | F | 46 |
| 238            | 0.77         | 0.153        | <b>0.617</b>  | 47.69 | 3         | 3         | F | 60 |
| 239            | 1.072        | 0.114        | <b>0.958</b>  | 78.93 | 4         | 4         | F | 62 |
| 240            | 0.602        | 0.088        | <b>0.514</b>  | 38.25 | 3         | 3         | F | 56 |
| 241            | 0.719        | 0.07         | <b>0.649</b>  | 50.62 | 4         | 4         | F | 64 |
| 242            | 1.062        | 0.104        | <b>0.958</b>  | 78.93 | 5         | 5         | M | 43 |
| 243            | 0.92         | 0.133        | <b>0.787</b>  | 63.26 | 4         | 4         | F | 63 |
| 244            | 0.753        | 0.123        | <b>0.63</b>   | 48.88 | 4         | 4         | F | 68 |
| 245            | 0.843        | 0.07         | <b>0.773</b>  | 61.98 | 5         | 5         | F | 28 |
| 246            | 0.539        | 0.104        | <b>0.435</b>  | 31.01 | 4         | 4         | M | 70 |
| 247            | 0.579        | 0.093        | <b>0.486</b>  | 35.68 | 4         | 4         | F | 55 |
| 248            | 1.025        | 0.119        | <b>0.906</b>  | 74.17 | 5         | 5         | M | 39 |
| 249            | 0.708        | 0.099        | <b>0.609</b>  | 46.95 | 4         | 4         | F | 48 |
| 250            | 0.649        | 0.05         | <b>0.599</b>  | 46.04 | 4         | 4         | F | 22 |
| 251            | 0.544        | 0.048        | <b>0.496</b>  | 36.60 | 4         | 4         | F | 46 |
| 252            | 0.436        | 0.005        | <b>0.431</b>  | 30.64 | 4         | 4         | M | 53 |
| <b>Plate 4</b> |              |              |               |       |           |           |   |    |
| Blank          | <b>0</b>     | <b>0</b>     | <b>0</b>      |       | <b>No</b> | <b>No</b> |   |    |
| Sub Negative   | <b>0.085</b> | <b>0.06</b>  | <b>0.025</b>  |       | <b>No</b> | <b>NO</b> |   |    |
| Inactivated    | <b>0.157</b> | <b>0.238</b> | <b>-0.081</b> |       | <b>No</b> | <b>No</b> |   |    |
| 100            | <b>1.414</b> | <b>0.041</b> | <b>1.373</b>  |       | <b>5</b>  | <b>5</b>  |   |    |
| 60             | <b>0.915</b> | <b>0.09</b>  | <b>0.825</b>  |       | <b>5</b>  | <b>5</b>  |   |    |
| 30             | <b>0.486</b> | <b>0.088</b> | <b>0.398</b>  |       | <b>2</b>  | <b>2</b>  |   |    |
| 10             | <b>0.324</b> | <b>0.056</b> | <b>0.268</b>  |       | <b>2</b>  | <b>2</b>  |   |    |
| 253            | 0.302        | 0.024        | <b>0.278</b>  | 15.79 | 2         | 2         | F | 68 |
| 254            | 0.531        | 0.051        | <b>0.48</b>   | 31.57 | 3         | 3         | F | 55 |
| 255            | 0.768        | 0.131        | <b>0.637</b>  | 43.83 | 3         | 3         | F | 63 |
| 256            | 0.518        | 0.011        | <b>0.507</b>  | 33.67 | 3         | 3         | F | 71 |
| 257            | 1.046        | 0.099        | <b>0.947</b>  | 68.04 | 5         | 6         | F | 41 |
| 258            | 0.676        | 0.169        | <b>0.507</b>  | 33.67 | 4         | 4         | F | 25 |
| 259            | 0.756        | 0.272        | <b>0.484</b>  | 31.88 | 4         | 4         | F | 62 |
| 260            | 0.675        | 0.162        | <b>0.513</b>  | 34.14 | 4         | 4         | F | 38 |
| 261            | 0.646        | 0.148        | <b>0.498</b>  | 32.97 | 4         | 4         | F | 70 |
| 262            | 0.213        | 0.012        | <b>0.201</b>  | 9.77  | 3         | 3         | M | 59 |
| 263            | 0.295        | 0.029        | <b>0.266</b>  | 14.85 | 3         | 3         | M | 56 |
| 264            | 0.84         | 0.038        | <b>0.802</b>  | 56.72 | 4         | 4         | M | 44 |
| 265            | 0.494        | 0.024        | <b>0.47</b>   | 30.78 | 4         | 4         | F | 41 |
| 266            | 1.26         | 0.177        | <b>1.083</b>  | 78.67 | 5         | 5         | F | 51 |
| 267            | 0.604        | 0.039        | <b>0.565</b>  | 38.21 | 4         | 4         | F | 41 |
| 268            | 0.747        | 0.059        | <b>0.688</b>  | 47.81 | 4         | 4         | F | 47 |

|                |              |              |              |       |           |           |   |    |
|----------------|--------------|--------------|--------------|-------|-----------|-----------|---|----|
| 269            | 0.585        | 0.033        | <b>0.552</b> | 37.19 | 4         | 4         | F | 38 |
| 270            | 0.922        | 0.092        | <b>0.83</b>  | 58.90 | 5         | 5         | F | 50 |
| 271            | 0.771        | 0.027        | <b>0.744</b> | 52.19 | 4         | 4         | F | 58 |
| 272            | 0.546        | 0.04         | <b>0.506</b> | 33.60 | 4         | 4         | F | 52 |
| 273            | 0.976        | 0.312        | <b>0.664</b> | 45.94 | 4         | 4         | F | 65 |
| 274            | 0.88         | 0.194        | <b>0.686</b> | 47.66 | 5         | 5         | F | 38 |
| 275            | 0.677        | 0.064        | <b>0.613</b> | 41.95 | 4         | 4         | F | 50 |
| 276            | 0.767        | 0.055        | <b>0.712</b> | 49.69 | 5         | 5         | M | 44 |
| 277            | 0.84         | 0.044        | <b>0.796</b> | 56.25 | 4         | 4         | F | 33 |
| 278            | 0.359        | 0.063        | <b>0.296</b> | 17.19 | 3         | 3         | M | 55 |
| 279            | 0.476        | 0.011        | <b>0.465</b> | 30.39 | 3         | 3         | F | 48 |
| 280            | 0.988        | 0.243        | <b>0.745</b> | 52.27 | 4         | 4         | F | 22 |
| 281            | 0.884        | 0.145        | <b>0.739</b> | 51.80 | 4         | 4         | F | 44 |
| 282            | 0.92         | 0.183        | <b>0.737</b> | 51.64 | 5         | 5         | M | 72 |
| 283            | 0.498        | 0.032        | <b>0.466</b> | 30.47 | 3         | 5         | M | 58 |
| 284            | 0.774        | 0.092        | <b>0.682</b> | 47.34 | 5         | 5         | F | 39 |
| 285            | 0.851        | 0.078        | <b>0.773</b> | 54.45 | 4         | 4         | M | 61 |
| 286            | 0.198        | 0.087        | <b>0.111</b> | 2.74  | 3         | 3         | M | 63 |
| 287            | 0.987        | 0.262        | <b>0.725</b> | 50.70 | 3         | 4         | M | 58 |
| 288            | 0.574        | 0.012        | <b>0.562</b> | 37.97 | 3         | 3         | F | 52 |
| <b>Plate 5</b> |              |              |              |       |           |           |   |    |
| Blank          | <b>0</b>     | <b>0</b>     | <b>0</b>     |       | <b>No</b> | <b>No</b> |   |    |
| Sub Negative   | <b>0.109</b> | <b>0.084</b> | <b>0.025</b> |       | <b>No</b> | <b>No</b> |   |    |
| Inactivated    | <b>0.241</b> | <b>0.202</b> | <b>0.039</b> |       | <b>No</b> | <b>No</b> |   |    |
| 100            | <b>1.419</b> | <b>0.04</b>  | <b>1.379</b> |       | <b>5</b>  | <b>5</b>  |   |    |
| 60             | <b>1.049</b> | <b>0.25</b>  | <b>0.799</b> |       | <b>5</b>  | <b>5</b>  |   |    |
| 30             | <b>0.648</b> | <b>0.23</b>  | <b>0.418</b> |       | <b>3</b>  | <b>3</b>  |   |    |
| 10             | <b>0.352</b> | <b>0.057</b> | <b>0.295</b> |       | <b>2</b>  | <b>2</b>  |   |    |
| 289            | 0.59         | 0.012        | <b>0.578</b> | 38.46 | 2         | 3         | F | 54 |
| 290            | 0.497        | 0.015        | <b>0.482</b> | 30.81 | 2         | 3         | F | 53 |
| 291            | 0.499        | 0.014        | <b>0.485</b> | 31.05 | 3         | 4         | M | 30 |
| 292            | 0.783        | 0.016        | <b>0.767</b> | 53.53 | 3         | 4         | F | 54 |
| 293            | 0.789        | 0.011        | <b>0.778</b> | 54.40 | 3         | 3         | F | 57 |
| 294            | 0.509        | 0.01         | <b>0.499</b> | 32.16 | 3         | 3         | F | 38 |
| 295            | 0.796        | 0.044        | <b>0.752</b> | 52.33 | 3         | 3         | F | 66 |
| 296            | 0.521        | 0.026        | <b>0.495</b> | 31.85 | 3         | 3         | F | 65 |
| 297            | 0.552        | 0.033        | <b>0.519</b> | 33.76 | 3         | 3         | F | 64 |
| 298            | 0.632        | 0.012        | <b>0.62</b>  | 41.81 | 3         | 3         | F | 60 |
| 299            | 0.719        | 0.033        | <b>0.686</b> | 47.07 | 4         | 4         | F | 47 |
| 300            | 0.909        | 0.023        | <b>0.886</b> | 63.01 | 4         | 4         | F | 53 |
| 301            | 0.936        | 0.32         | <b>0.616</b> | 41.49 | 4         | 4         | F | 65 |
| 302            | 0.746        | 0.089        | <b>0.657</b> | 44.76 | 2         | 2         | F | 72 |
| 303            | 0.699        | 0.102        | <b>0.597</b> | 39.98 | 2         | 2         | F | 68 |



|     |       |       |              |       |   |   |   |    |
|-----|-------|-------|--------------|-------|---|---|---|----|
| 304 | 0.722 | 0.011 | <b>0.711</b> | 49.06 | 5 | 5 | F | 70 |
| 305 | 0.56  | 0.045 | <b>0.515</b> | 33.44 | 2 | 2 | F | 69 |
| 306 | 0.289 | 0.016 | <b>0.273</b> | 14.15 | 2 | 2 | F | 71 |
| 307 | 0.635 | 0.024 | <b>0.611</b> | 41.09 | 3 | 3 | F | 35 |
| 308 | 0.641 | 0.013 | <b>0.628</b> | 42.45 | 4 | 3 | F | 52 |
| 309 | 0.638 | 0.014 | <b>0.624</b> | 42.13 | 3 | 3 | F | 35 |
| 310 | 0.299 | 0.012 | <b>0.287</b> | 15.27 | 2 | 2 | F | 65 |
| 311 | 0.329 | 0.015 | <b>0.314</b> | 17.42 | 2 | 2 | F | 54 |
| 312 | 1.176 | 0.045 | <b>1.131</b> | 82.54 | 5 | 5 | F | 47 |
| 313 | 0.215 | 0.004 | <b>0.211</b> | 9.21  | 2 | 2 | M | 52 |
| 314 | 0.495 | 0.015 | <b>0.48</b>  | 30.65 | 3 | 3 | M | 50 |
| 315 | 1.013 | 0.018 | <b>0.995</b> | 71.70 | 4 | 4 | F | 63 |
| 316 | 0.868 | 0.167 | <b>0.701</b> | 48.27 | 4 | 4 | F | 58 |
| 317 | 0.802 | 0.019 | <b>0.783</b> | 54.80 | 4 | 4 | M | 60 |
| 318 | 0.577 | 0.017 | <b>0.56</b>  | 37.03 | 4 | 4 | M | 55 |
| 319 | 0.49  | 0.012 | <b>0.478</b> | 30.49 | 3 | 3 | M | 49 |
| 320 | 0.596 | 0.026 | <b>0.57</b>  | 37.82 | 4 | 4 | F | 70 |
| 321 | 0.591 | 0.014 | <b>0.577</b> | 38.38 | 4 | 4 | M | 63 |
| 322 | 0.527 | 0.02  | <b>0.507</b> | 32.80 | 4 | 4 | F | 64 |
| 323 | 0.57  | 0.024 | <b>0.546</b> | 35.91 | 4 | 4 | F | 60 |
| 324 | 0.227 | 0.007 | <b>0.22</b>  | 9.93  | 2 | 2 | F | 60 |
| 325 | 0.633 | 0.147 | <b>0.486</b> | 31.13 | 3 | 3 | M | 62 |
| 326 | 0.654 | 0.049 | <b>0.605</b> | 40.61 | 3 | 3 | F | 57 |
| 327 | 0.164 | 0.012 | <b>0.152</b> | 4.50  | 2 | 2 | F | 70 |
| 328 | 0.283 | 0.01  | <b>0.273</b> | 14.15 | 2 | 2 | F | 34 |
| 329 | 0.611 | 0.042 | <b>0.569</b> | 37.74 | 4 | 4 | M | 63 |
| 330 | 0.301 | 0.015 | <b>0.286</b> | 15.19 | 3 | 3 | F | 45 |
| 331 | 0.685 | 0.011 | <b>0.674</b> | 46.11 | 5 | 4 | F | 72 |
| 332 | 0.649 | 0.016 | <b>0.633</b> | 42.85 | 5 | 5 | F | 63 |
| 333 | 0.551 | 0.024 | <b>0.527</b> | 34.40 | 3 | 3 | M | 54 |
| 334 | 0.61  | 0.074 | <b>0.536</b> | 35.11 | 4 | 4 | M | 58 |
| 335 | 0.911 | 0.018 | <b>0.893</b> | 63.57 | 5 | 5 | M | 72 |
| 336 | 0.795 | 0.111 | <b>0.684</b> | 46.91 | 5 | 5 | M | 72 |
| 337 | 0.491 | 0.015 | <b>0.476</b> | 30.33 | 4 | 4 | F | 65 |
| 338 | 0.229 | 0.018 | <b>0.211</b> | 9.21  | 2 | 2 | F | 58 |
| 339 | 0.779 | 0.016 | <b>0.763</b> | 53.21 | 4 | 4 | F | 57 |
| 340 | 0.953 | 0.146 | <b>0.807</b> | 56.72 | 4 | 4 | F | 31 |
| 341 | 0.709 | 0.025 | <b>0.684</b> | 46.91 | 4 | 4 | F | 51 |
| 342 | 0.661 | 0.181 | <b>0.48</b>  | 30.65 | 3 | 3 | F | 52 |
| 343 | 0.689 | 0.043 | <b>0.646</b> | 43.88 | 5 | 5 | M | 66 |
| 344 | 0.674 | 0.032 | <b>0.642</b> | 43.56 | 5 | 5 | F | 63 |
| 345 | 0.501 | 0.016 | <b>0.485</b> | 31.05 | 4 | 4 | M | 60 |
| 346 | 0.651 | 0.026 | <b>0.625</b> | 42.21 | 5 | 5 | F | 54 |

|                |              |              |              |       |           |           |   |    |
|----------------|--------------|--------------|--------------|-------|-----------|-----------|---|----|
| 347            | 0.3          | 0.008        | <b>0.292</b> | 15.66 | 3         | 3         | F | 75 |
| 348            | 0.27         | 0.04         | <b>0.23</b>  | 10.72 | 3         | 3         | F | 49 |
| 349            | 0.589        | 0.052        | <b>0.537</b> | 35.19 | 4         | 4         | F | 63 |
| 350            | 0.521        | 0.037        | <b>0.484</b> | 30.97 | 3         | 3         | F | 63 |
| 351            | 0.392        | 0.05         | <b>0.342</b> | 19.65 | 3         | 3         | F | 63 |
| 352            | 0.56         | 0.06         | <b>0.5</b>   | 32.24 | 3         | 3         | F | 73 |
| 353            | 0.342        | 0.053        | <b>0.289</b> | 15.43 | 3         | 3         | F | 52 |
| 354            | 0.489        | 0.011        | <b>0.478</b> | 30.49 | 4         | 4         | F | 63 |
| 355            | 0.948        | 0.109        | <b>0.839</b> | 59.27 | 4         | 5         | F | 46 |
| 356            | 0.276        | 0.018        | <b>0.258</b> | 12.95 | 2         | 2         | F | 39 |
| 357            | 0.682        | 0.055        | <b>0.627</b> | 42.37 | 4         | 4         | F | 73 |
| 358            | 0.603        | 0.099        | <b>0.504</b> | 32.56 | 3         | 3         | F | 56 |
| 359            | 0.523        | 0.041        | <b>0.482</b> | 30.81 | 3         | 3         | F | 58 |
| 360            | 0.495        | 0.016        | <b>0.479</b> | 30.57 | 3         | 3         | F | 62 |
| 361            | 0.724        | 0.067        | <b>0.657</b> | 44.76 | 4         | 4         | M | 53 |
| 362            | 0.567        | 0.09         | <b>0.477</b> | 30.41 | 4         | 4         | F | 73 |
| 363            | 0.63         | 0.035        | <b>0.595</b> | 39.82 | 4         | 4         | F | 38 |
| 364            | 0.518        | 0.04         | <b>0.478</b> | 30.49 | 4         | 4         | F | 57 |
| 365            | 1.008        | 0.091        | <b>0.917</b> | 65.48 | 5         | 5         | F | 64 |
| 366            | 0.487        | 0.006        | <b>0.481</b> | 30.73 | 3         | 3         | F | 72 |
| 367            | 0.572        | 0.07         | <b>0.502</b> | 32.40 | 3         | 3         | F | 53 |
| 368            | 0.342        | 0.113        | <b>0.229</b> | 10.64 | 3         | 3         | F | 70 |
| 369            | 0.805        | 0.061        | <b>0.744</b> | 51.69 | 5         | 5         | F | 56 |
| 370            | 0.584        | 0.073        | <b>0.511</b> | 33.12 | 5         | 5         | M | 76 |
| 371            | 0.543        | 0.066        | <b>0.477</b> | 30.41 | 4         | 4         | F | 53 |
| 372            | 0.638        | 0.055        | <b>0.583</b> | 38.86 | 4         | 4         | F | 57 |
| <b>Plate 6</b> |              |              |              |       |           |           |   |    |
| Blank          | <b>0</b>     | <b>0</b>     | <b>0</b>     |       | <b>No</b> | <b>No</b> |   |    |
| Sub Negative   | <b>0.074</b> | <b>0.068</b> | <b>0.006</b> |       | <b>No</b> | <b>No</b> |   |    |
| Inactivated    | <b>0.044</b> | <b>0.021</b> | <b>0.023</b> |       | <b>No</b> | <b>No</b> |   |    |
| 100            | <b>1.278</b> | <b>0.096</b> | <b>1.182</b> |       | <b>6</b>  | <b>6</b>  |   |    |
| 60             | <b>0.612</b> | <b>0.027</b> | <b>0.585</b> |       | <b>3</b>  | <b>3</b>  |   |    |
| 30             | <b>0.379</b> | <b>0.06</b>  | <b>0.319</b> |       | <b>3</b>  | <b>3</b>  |   |    |
| 10             | <b>0.265</b> | <b>0.02</b>  | <b>0.245</b> |       | <b>2</b>  | <b>2</b>  |   |    |
| 373            | 0.523        | 0.024        | <b>0.499</b> | 42.47 | 3         | 3         | M | 40 |
| 374            | 0.364        | 0.055        | <b>0.309</b> | 25.40 | 2         | 2         | F | 68 |
| 375            | 0.264        | 0.008        | <b>0.256</b> | 20.64 | 2         | 2         | F | 63 |
| 376            | 0.286        | 0.052        | <b>0.234</b> | 18.66 | 3         | 3         | F | 52 |
| 377            | 0.389        | 0.016        | <b>0.373</b> | 31.15 | 3         | 3         | F | 32 |
| 378            | 0.966        | 0.066        | <b>0.9</b>   | 78.51 | 5         | 5         | M | 40 |
| 379            | 0.758        | 0.165        | <b>0.593</b> | 50.92 | 3         | 3         | M | 40 |
| 380            | 0.591        | 0.08         | <b>0.511</b> | 43.55 | 3         | 3         | F | 70 |
| 381            | 0.807        | 0.057        | <b>0.75</b>  | 65.03 | 4         | 4         | F | 51 |

|     |       |       |              |        |   |   |   |       |
|-----|-------|-------|--------------|--------|---|---|---|-------|
| 382 | 0.619 | 0.03  | <b>0.589</b> | 50.56  | 3 | 3 | F | 66    |
| 383 | 0.428 | 0.007 | <b>0.421</b> | 35.47  | 3 | 3 | F | 49    |
| 384 | 0.294 | 0.041 | <b>0.253</b> | 20.37  | 2 | 2 | F | 59    |
| 385 | 0.519 | 0.112 | <b>0.407</b> | 34.21  | 3 | 3 | F | 75    |
| 386 | 0.577 | 0.083 | <b>0.494</b> | 42.03  | 3 | 3 | F | 51    |
| 387 | 1.136 | 0.094 | <b>1.042</b> | 91.27  | 6 | 6 | M | 24    |
| 388 | 0.655 | 0.034 | <b>0.621</b> | 53.44  | 3 | 3 | F | 48    |
| 389 | 0.561 | 0.051 | <b>0.51</b>  | 43.46  | 3 | 3 | F | 56    |
| 390 | 0.433 | 0.043 | <b>0.39</b>  | 32.68  | 2 | 2 | F | 74    |
| 391 | 0.421 | 0.025 | <b>0.396</b> | 33.22  | 3 | 3 | F | 60    |
| 392 | 0.811 | 0.019 | <b>0.792</b> | 68.80  | 4 | 4 | M | 40    |
| 393 | 0.354 | 0.009 | <b>0.345</b> | 28.64  | 3 | 3 | M | 58    |
| 394 | 0.667 | 0.031 | <b>0.636</b> | 54.78  | 4 | 4 | M | 52    |
| 395 | 0.807 | 0.261 | <b>0.546</b> | 46.70  | 5 | 5 | F | 73    |
| 396 | 0.699 | 0.066 | <b>0.633</b> | 54.52  | 3 | 3 | F | 9     |
| 397 | 0.433 | 0.027 | <b>0.406</b> | 34.12  | 2 | 2 | M | 11    |
| 398 | 0.88  | 0.062 | <b>0.818</b> | 71.14  | 5 | 5 | F | 7     |
| 399 | 0.234 | 0.13  | <b>0.104</b> | 6.98   | 2 | 2 | F | 55    |
| 400 | 0.723 | 0.059 | <b>0.664</b> | 57.30  | 4 | 4 | F | 47    |
| 401 | 0.798 | 0.079 | <b>0.719</b> | 62.24  | 5 | 5 | M | 13    |
| 402 | 0.69  | 0.208 | <b>0.482</b> | 40.95  | 4 | 4 | M | 1     |
| 403 | 1.291 | 0.059 | <b>1.232</b> | 108.34 | 6 | 6 | F | 7y 8m |
| 404 | 0.749 | 0.37  | <b>0.379</b> | 31.69  | 3 | 3 | F | 70    |
| 405 | 0.631 | 0.021 | <b>0.61</b>  | 52.45  | 4 | 3 | F | 44    |
| 406 | 1.473 | 0.385 | <b>1.088</b> | 95.40  | 5 | 5 | F | 39    |
| 407 | 1.125 | 0.42  | <b>0.705</b> | 60.99  | 4 | 4 | M | 58    |
| 408 | 1.314 | 0.167 | <b>1.147</b> | 100.70 | 5 | 5 | F | 60    |
| 409 | 1.027 | 0.047 | <b>0.98</b>  | 85.70  | 5 | 5 | M | 77    |
| 410 | 0.978 | 0.142 | <b>0.836</b> | 72.76  | 5 | 5 | M | 58    |
| 411 | 0.909 | 0.096 | <b>0.813</b> | 70.69  | 5 | 5 | F | 54    |
| 412 | 0.8   | 0.05  | <b>0.75</b>  | 65.03  | 5 | 5 | F | 58    |
| 413 | 1.052 | 0.288 | <b>0.764</b> | 66.29  | 4 | 4 | M | 46    |
| 414 | 1.072 | 0.393 | <b>0.679</b> | 58.65  | 4 | 4 | M | 53    |
| 415 | 1.097 | 0.337 | <b>0.76</b>  | 65.93  | 4 | 4 | F | 53    |
| 416 | 0.811 | 0.103 | <b>0.708</b> | 61.25  | 4 | 4 | F | 11    |
| 417 | 1.175 | 0.27  | <b>0.905</b> | 78.96  | 5 | 5 | M | 67    |
| 418 | 1.592 | 0.58  | <b>1.012</b> | 88.57  | 5 | 5 | F | 60    |
| 419 | 1.185 | 0.265 | <b>0.92</b>  | 80.30  | 5 | 5 | M | 66    |
| 420 | 0.847 | 0.054 | <b>0.793</b> | 68.89  | 5 | 5 | M | 44    |
| 421 | 0.774 | 0.051 | <b>0.723</b> | 62.60  | 4 | 4 | F | 27    |
| 422 | 0.73  | 0.059 | <b>0.671</b> | 57.93  | 4 | 4 | M | 14    |
| 423 | 1.254 | 0.082 | <b>1.172</b> | 102.95 | 5 | 5 | F | 14    |
| 424 | 0.642 | 0.069 | <b>0.573</b> | 49.12  | 4 | 4 | F | 17    |

|                |              |              |              |        |           |           |   |    |
|----------------|--------------|--------------|--------------|--------|-----------|-----------|---|----|
| 425            | 0.992        | 0.255        | <b>0.737</b> | 63.86  | 4         | 4         | F | 33 |
| 426            | 0.802        | 0.1          | <b>0.702</b> | 60.72  | 4         | 4         | F | 72 |
| 427            | 0.88         | 0.049        | <b>0.831</b> | 72.31  | 3         | 4         | F | 80 |
| 428            | 1.246        | 0.081        | <b>1.165</b> | 102.32 | 6         | 6         | F | 43 |
| 429            | 0.741        | 0.041        | <b>0.7</b>   | 60.54  | 4         | 4         | F | 77 |
| 430            | 0.824        | 0.106        | <b>0.718</b> | 62.15  | 4         | 4         | F | 59 |
| 431            | 1.287        | 0.083        | <b>1.204</b> | 105.82 | 5         | 5         | F | 50 |
| 432            | 0.902        | 0.028        | <b>0.874</b> | 76.17  | 5         | 5         | F | 33 |
| 433            | 1.245        | 0.099        | <b>1.146</b> | 100.61 | 5         | 5         | M | 52 |
| 434            | 1.096        | 0.424        | <b>0.672</b> | 58.02  | 4         | 4         | F | 57 |
| 435            | 1.576        | 0.464        | <b>1.112</b> | 97.56  | 5         | 5         | F | 65 |
| 436            | 1.044        | 0.091        | <b>0.953</b> | 83.27  | 5         | 5         | F | 38 |
| 437            | 0.68         | 0.082        | <b>0.598</b> | 51.37  | 4         | 3         | F | 80 |
| 438            | 1.397        | 0.515        | <b>0.882</b> | 76.89  | 4         | 4         | M | 62 |
| 439            | 0.981        | 0.042        | <b>0.939</b> | 82.01  | 4         | 4         | F | 55 |
| 440            | 0.778        | 0.354        | <b>0.424</b> | 35.74  | 4         | 4         | M | 63 |
| 441            | 1.037        | 0.459        | <b>0.578</b> | 49.57  | 4         | 4         | F | 43 |
| 442            | 0.817        | 0.129        | <b>0.688</b> | 59.46  | 4         | 4         | M | 72 |
| 443            | 0.949        | 0.192        | <b>0.757</b> | 65.66  | 5         | 5         | F | 37 |
| 444            | 0.86         | 0.112        | <b>0.748</b> | 64.85  | 4         | 4         | F | 78 |
| 445            | 1.338        | 0.086        | <b>1.252</b> | 110.14 | 5         | 5         | F | 54 |
| 446            | 1.218        | 0.078        | <b>1.14</b>  | 100.07 | 5         | 5         | F | 51 |
| 447            | 1.16         | 0.054        | <b>1.106</b> | 97.02  | 5         | 5         | M | 68 |
| 448            | 1.016        | 0.272        | <b>0.744</b> | 64.49  | 4         | 4         | F | 56 |
| 449            | 0.785        | 0.062        | <b>0.723</b> | 62.60  | 4         | 4         | F | 54 |
| 450            | 0.755        | 0.123        | <b>0.632</b> | 54.43  | 4         | 4         | F | 62 |
| 451            | 0.402        | 0.034        | <b>0.368</b> | 30.70  | 2         | 2         | F | 61 |
| 452            | 0.878        | 0.11         | <b>0.768</b> | 66.65  | 4         | 4         | F | 52 |
| 453            | 0.894        | 0.071        | <b>0.823</b> | 71.59  | 5         | 5         | F | 48 |
| 454            | 0.784        | 0.076        | <b>0.708</b> | 61.25  | 4         | 4         | M | 60 |
| 455            | 0.684        | 0.077        | <b>0.607</b> | 52.18  | 4         | 4         | M | 62 |
| 456            | 0.575        | 0.057        | <b>0.518</b> | 44.18  | 4         | 4         | F | 42 |
| <b>Plate 7</b> |              |              |              |        |           |           |   |    |
| Blank          | <b>0</b>     | <b>0</b>     | <b>0</b>     |        | <b>No</b> | <b>No</b> |   |    |
| Sub Negative   | <b>0.112</b> | <b>0.084</b> | <b>0.028</b> |        | <b>No</b> | <b>No</b> |   |    |
| Inactivated    | <b>0.104</b> | <b>0.079</b> | <b>0.025</b> |        | <b>No</b> | <b>No</b> |   |    |
| 100            | <b>1.474</b> | <b>0.224</b> | <b>1.25</b>  |        | <b>5</b>  | <b>5</b>  |   |    |
| 60             | <b>0.83</b>  | <b>0.097</b> | <b>0.733</b> |        | <b>5</b>  | <b>5</b>  |   |    |
| 30             | <b>0.519</b> | <b>0.072</b> | <b>0.447</b> |        | <b>3</b>  | <b>3</b>  |   |    |
| 10             | <b>0.394</b> | <b>0.119</b> | <b>0.275</b> |        | <b>2</b>  | <b>2</b>  |   |    |
| 457            | 0.677        | 0.068        | <b>0.609</b> | 43.85  | 3         | 3         | F | 66 |
| 458            | 0.529        | 0.06         | <b>0.469</b> | 31.06  | 3         | 3         | F | 64 |
| 459            | 0.819        | 0.047        | <b>0.772</b> | 58.75  | 4         | 4         | M | 66 |

|     |       |       |              |       |   |   |   |      |
|-----|-------|-------|--------------|-------|---|---|---|------|
| 460 | 0.95  | 0.175 | <b>0.775</b> | 59.02 | 4 | 4 | M | 69   |
| 461 | 0.773 | 0.036 | <b>0.737</b> | 55.55 | 3 | 3 | F | 58   |
| 462 | 0.602 | 0.077 | <b>0.525</b> | 36.18 | 3 | 3 | F | 48   |
| 463 | 1.025 | 0.284 | <b>0.741</b> | 55.92 | 4 | 4 | M | 58   |
| 464 | 0.482 | 0.015 | <b>0.467</b> | 30.88 | 3 | 3 | F | 60   |
| 465 | 0.539 | 0.062 | <b>0.477</b> | 31.79 | 3 | 3 | F | 61   |
| 466 | 0.666 | 0.06  | <b>0.606</b> | 43.58 | 4 | 4 | F | 54   |
| 467 | 0.61  | 0.03  | <b>0.58</b>  | 41.20 | 3 | 3 | F | 60   |
| 468 | 0.57  | 0.035 | <b>0.535</b> | 37.09 | 3 | 3 | M | 71   |
| 469 | 0.368 | 0.023 | <b>0.345</b> | 19.73 | 2 | 2 | F | 70   |
| 470 | 0.583 | 0.062 | <b>0.521</b> | 35.81 | 3 | 3 | M | 72   |
| 471 | 0.572 | 0.047 | <b>0.525</b> | 36.18 | 4 | 4 | F | 58   |
| 472 | 0.855 | 0.032 | <b>0.823</b> | 63.41 | 4 | 4 | F | 52   |
| 473 | 0.686 | 0.032 | <b>0.654</b> | 47.97 | 3 | 3 | F | 64   |
| 474 | 0.736 | 0.043 | <b>0.693</b> | 51.53 | 3 | 3 | F | 32   |
| 475 | 0.885 | 0.053 | <b>0.832</b> | 64.23 | 3 | 3 | F | 49   |
| 476 | 0.763 | 0.039 | <b>0.724</b> | 54.36 | 3 | 3 | F | 12   |
| 477 | 0.667 | 0.078 | <b>0.589</b> | 42.03 | 4 | 4 | F | 59   |
| 478 | 0.613 | 0.072 | <b>0.541</b> | 37.64 | 3 | 3 | M | 52   |
| 479 | 0.217 | 0.07  | <b>0.147</b> | 1.64  | 2 | 2 | M | 64   |
| 480 | 0.78  | 0.133 | <b>0.647</b> | 47.33 | 4 | 4 | F | 62   |
| 481 | 0.821 | 0.027 | <b>0.794</b> | 60.76 | 4 | 4 | F | 37   |
| 482 | 0.675 | 0.064 | <b>0.611</b> | 44.04 | 4 | 4 | F | 46   |
| 483 | 0.574 | 0.035 | <b>0.539</b> | 37.46 | 4 | 4 | F | 56   |
| 484 | 0.501 | 0.018 | <b>0.483</b> | 32.34 | 3 | 3 | F | 52   |
| 485 | 0.646 | 0.045 | <b>0.601</b> | 43.12 | 4 | 4 | F | 70   |
| 486 | 0.854 | 0.07  | <b>0.784</b> | 59.85 | 4 | 4 | M | 52   |
| 487 | 0.743 | 0.054 | <b>0.689</b> | 51.17 | 4 | 4 | F | 71   |
| 488 | 0.402 | 0.037 | <b>0.365</b> | 21.56 | 2 | 2 | F | 35   |
| 489 | 0.682 | 0.025 | <b>0.657</b> | 48.24 | 4 | 4 | M | 5y6m |
| 490 | 0.575 | 0.041 | <b>0.534</b> | 37.00 | 3 | 3 | F | 69   |
| 491 | 0.92  | 0.023 | <b>0.897</b> | 70.17 | 4 | 4 | M | 6    |
| 492 | 0.777 | 0.027 | <b>0.75</b>  | 56.74 | 4 | 4 | M | 65   |
| 493 | 0.479 | 0.012 | <b>0.467</b> | 30.88 | 3 | 3 | F | 37   |
| 494 | 0.693 | 0.188 | <b>0.505</b> | 34.35 | 3 | 3 | F | 39   |
| 495 | 0.684 | 0.036 | <b>0.648</b> | 47.42 | 4 | 4 | F | 48   |
| 496 | 0.405 | 0.088 | <b>0.317</b> | 17.17 | 2 | 2 | F | 52   |
| 497 | 0.605 | 0.058 | <b>0.547</b> | 38.19 | 3 | 3 | F | 42   |
| 498 | 0.571 | 0.078 | <b>0.493</b> | 33.25 | 3 | 2 | F | 46   |
| 499 | 0.402 | 0.016 | <b>0.386</b> | 23.48 | 2 | 2 | M | 46   |
| 500 | 0.764 | 0.034 | <b>0.73</b>  | 54.91 | 4 | 4 | F | 36   |
| 501 | 0.826 | 0.061 | <b>0.765</b> | 58.11 | 4 | 4 | M | 56   |
| 502 | 0.616 | 0.072 | <b>0.544</b> | 37.92 | 3 | 3 | F | 60   |

|                |              |              |              |       |           |           |   |    |
|----------------|--------------|--------------|--------------|-------|-----------|-----------|---|----|
| 503            | 0.862        | 0.058        | <b>0.804</b> | 61.67 | 4         | 4         | M | 78 |
| 504            | 0.922        | 0.113        | <b>0.809</b> | 62.13 | 5         | 5         | M | 62 |
| 505            | 1.115        | 0.323        | <b>0.792</b> | 60.58 | 5         | 5         | F | 58 |
| 506            | 0.426        | 0.054        | <b>0.372</b> | 22.20 | 2         | 2         | F | 60 |
| 507            | 0.5          | 0.025        | <b>0.475</b> | 31.61 | 2         | 2         | M | 59 |
| 508            | 0.162        | 0.022        | <b>0.14</b>  | 1.00  | 2         | 2         | M | 65 |
| 509            | 0.197        | 0.048        | <b>0.149</b> | 1.82  | 1         | 1         | F | 25 |
| 510            | 0.681        | 0.094        | <b>0.587</b> | 41.84 | 4         | 4         | M | 55 |
| 511            | 0.629        | 0.061        | <b>0.568</b> | 40.11 | 4         | 4         | F | 41 |
| 512            | 0.763        | 0.07         | <b>0.693</b> | 51.53 | 4         | 4         | F | 43 |
| 513            | 0.479        | 0.013        | <b>0.466</b> | 30.79 | 3         | 3         | F | 54 |
| 514            | 0.907        | 0.05         | <b>0.857</b> | 66.52 | 4         | 4         | F | 66 |
| 515            | 0.92         | 0.041        | <b>0.879</b> | 68.53 | 4         | 4         | M | 65 |
| 516            | 0.614        | 0.055        | <b>0.559</b> | 39.29 | 4         | 4         | F | 66 |
| 517            | 0.558        | 0.065        | <b>0.493</b> | 33.25 | 3         | 3         | F | 63 |
| 518            | 0.684        | 0.103        | <b>0.581</b> | 41.30 | 3         | 4         | F | 63 |
| 519            | 0.712        | 0.073        | <b>0.639</b> | 46.60 | 4         | 4         | F | 29 |
| 520            | 0.629        | 0.113        | <b>0.516</b> | 35.36 | 4         | 4         | F | 65 |
| 521            | 0.747        | 0.077        | <b>0.67</b>  | 49.43 | 4         | 4         | F | 42 |
| 522            | 0.569        | 0.064        | <b>0.505</b> | 34.35 | 3         | 3         | M | 65 |
| 523            | 0.513        | 0.047        | <b>0.466</b> | 30.79 | 3         | 3         | M | 63 |
| 524            | 0.711        | 0.064        | <b>0.647</b> | 47.33 | 3         | 3         | M | 44 |
| 525            | 0.344        | 0.08         | <b>0.264</b> | 12.33 | 3         | 3         | M | 57 |
| 526            | 0.626        | 0.106        | <b>0.52</b>  | 35.72 | 3         | 3         | F | 62 |
| 527            | 0.59         | 0.087        | <b>0.503</b> | 34.17 | 3         | 3         | M | 47 |
| 528            | 0.755        | 0.093        | <b>0.662</b> | 48.70 | 3         | 2         | F | 51 |
| 529            | 0.704        | 0.092        | <b>0.612</b> | 44.13 | 3         | 3         | F | 34 |
| 530            | 0.546        | 0.079        | <b>0.467</b> | 30.88 | 3         | 3         | F | 52 |
| 531            | 0.341        | 0.057        | <b>0.284</b> | 14.16 | 2         | 2         | F | 57 |
| 532            | 0.758        | 0.063        | <b>0.695</b> | 51.71 | 3         | 3         | F | 32 |
| 533            | 0.606        | 0.124        | <b>0.482</b> | 32.25 | 3         | 3         | F | 43 |
| 534            | 0.786        | 0.103        | <b>0.683</b> | 50.62 | 4         | 4         | F | 65 |
| 535            | 0.694        | 0.103        | <b>0.591</b> | 42.21 | 4         | 4         | M | 66 |
| 536            | 1.08         | 0.123        | <b>0.957</b> | 75.65 | 4         | 4         | M | 74 |
| 537            | 0.716        | 0.1          | <b>0.616</b> | 44.49 | 4         | 4         | F | 50 |
| 538            | 0.535        | 0.06         | <b>0.475</b> | 31.61 | 3         | 3         | F | 48 |
| 539            | 0.396        | 0.073        | <b>0.323</b> | 17.72 | 2         | 2         | M | 63 |
| 540            | 0.216        | 0.056        | <b>0.16</b>  | 2.83  | 1         | 1         | F | 79 |
| <b>Plate 8</b> |              |              |              |       |           |           |   |    |
| Blank          | <b>0</b>     | <b>0</b>     | <b>0</b>     |       | <b>No</b> | <b>No</b> |   |    |
| Sub Negative   | <b>0.167</b> | <b>0.13</b>  | <b>0.037</b> |       | <b>No</b> | <b>No</b> |   |    |
| Inactivated    | <b>0.205</b> | <b>0.141</b> | <b>0.064</b> |       | <b>No</b> | <b>no</b> |   |    |
| 100            | <b>1.074</b> | <b>0.224</b> | <b>0.85</b>  |       | <b>5</b>  | <b>5</b>  |   |    |

|     |              |              |              |        |          |          |   |    |
|-----|--------------|--------------|--------------|--------|----------|----------|---|----|
| 60  | <b>0.672</b> | <b>0.057</b> | <b>0.615</b> |        | <b>5</b> | <b>5</b> |   |    |
| 30  | <b>0.429</b> | <b>0.052</b> | <b>0.377</b> |        | <b>3</b> | <b>3</b> |   |    |
| 10  | <b>0.374</b> | <b>0.119</b> | <b>0.255</b> |        | <b>2</b> | <b>2</b> |   |    |
| 541 | 0.48         | 0.082        | <b>0.398</b> | 31.29  | 2        | 2        | F | 47 |
| 542 | 0.494        | 0.08         | <b>0.414</b> | 33.66  | 2        | 2        | F | 53 |
| 543 | 0.448        | 0.052        | <b>0.396</b> | 30.99  | 2        | 2        | F | 57 |
| 544 | 0.676        | 0.086        | <b>0.59</b>  | 59.75  | 3        | 3        | F | 54 |
| 545 | 0.243        | 0.033        | <b>0.21</b>  | 3.42   | 2        | 2        | M | 53 |
| 546 | 0.487        | 0.077        | <b>0.41</b>  | 33.06  | 3        | 3        | M | 72 |
| 547 | 0.673        | 0.061        | <b>0.612</b> | 63.01  | 4        | 4        | M | 65 |
| 548 | 0.588        | 0.094        | <b>0.494</b> | 45.52  | 4        | 4        | F | 50 |
| 549 | 0.419        | 0.022        | <b>0.397</b> | 31.14  | 2        | 2        | F | 66 |
| 550 | 0.468        | 0.07         | <b>0.398</b> | 31.29  | 3        | 3        | F | 56 |
| 551 | 0.702        | 0.044        | <b>0.658</b> | 69.83  | 4        | 4        | M | 52 |
| 552 | 0.508        | 0.053        | <b>0.455</b> | 39.74  | 3        | 3        | F | 48 |
| 553 | 0.587        | 0.036        | <b>0.551</b> | 53.97  | 3        | 3        | F | 22 |
| 554 | 0.503        | 0.039        | <b>0.464</b> | 41.07  | 3        | 3        | M | 75 |
| 555 | 0.409        | 0.016        | <b>0.393</b> | 30.54  | 3        | 3        | F | 42 |
| 556 | 0.548        | 0.069        | <b>0.479</b> | 43.29  | 3        | 3        | F | 66 |
| 557 | 0.594        | 0.098        | <b>0.496</b> | 45.81  | 3        | 3        | F | 54 |
| 558 | 0.756        | 0.08         | <b>0.676</b> | 72.49  | 4        | 4        | F | 60 |
| 559 | 0.419        | 0.029        | <b>0.39</b>  | 30.10  | 3        | 3        | F | 68 |
| 560 | 0.559        | 0.061        | <b>0.498</b> | 46.11  | 3        | 3        | F | 56 |
| 561 | 0.472        | 0.042        | <b>0.43</b>  | 36.03  | 3        | 3        | F | 58 |
| 562 | 0.443        | 0.046        | <b>0.397</b> | 31.14  | 3        | 3        | F | 80 |
| 563 | 0.722        | 0.027        | <b>0.695</b> | 75.31  | 4\3      | 4        | F | 59 |
| 564 | 0.965        | 0.076        | <b>0.889</b> | 104.07 | 4        | 4        | F | 25 |
| 565 | 0.766        | 0.073        | <b>0.693</b> | 75.01  | 4        | 4        | F | 59 |
| 566 | 1.157        | 0.36         | <b>0.797</b> | 90.43  | 4        | 4        | F | 62 |
| 567 | 0.507        | 0.042        | <b>0.465</b> | 41.22  | 3        | 3        | F | 68 |
| 568 | 0.822        | 0.059        | <b>0.763</b> | 85.39  | 4        | 4        | M | 58 |
| 569 | 0.548        | 0.052        | <b>0.496</b> | 45.81  | 3        | 3        | M | 72 |
| 570 | 0.358        | 0.05         | <b>0.308</b> | 17.95  | 2\3      | 2        | F | 65 |
| 571 | 0.553        | 0.053        | <b>0.5</b>   | 46.41  | 3        | 3        | F | 49 |
| 572 | 0.48         | 0.083        | <b>0.397</b> | 31.14  | 3        | 3        | F | 60 |
| 573 | 0.671        | 0.055        | <b>0.616</b> | 63.60  | 4        | 4        | M | 66 |
| 574 | 0.727        | 0.059        | <b>0.668</b> | 71.31  | 4        | 4        | F | 63 |
| 575 | 0.456        | 0.031        | <b>0.425</b> | 35.29  | 3        | 3        | M | 64 |
| 576 | 0.27         | 0.039        | <b>0.231</b> | 6.53   | 2        | 2        | F | 64 |
| 577 | 0.604        | 0.021        | <b>0.583</b> | 58.71  | 4        | 4        | F | 46 |
| 578 | 0.319        | 0.034        | <b>0.285</b> | 14.54  | 3        | 3        | F | 54 |
| 579 | 0.69         | 0.076        | <b>0.614</b> | 63.30  | 4\3      | 3        | M | 72 |
| 580 | 0.48         | 0.071        | <b>0.409</b> | 32.92  | 3        | 3        | F | 41 |

|     |       |       |              |        |     |   |   |    |
|-----|-------|-------|--------------|--------|-----|---|---|----|
| 581 | 0.497 | 0.064 | <b>0.433</b> | 36.47  | 3   | 3 | M | 68 |
| 582 | 0.474 | 0.058 | <b>0.416</b> | 33.95  | 3   | 3 | F | 60 |
| 583 | 0.767 | 0.044 | <b>0.723</b> | 79.46  | 4   | 4 | F | 40 |
| 584 | 0.626 | 0.032 | <b>0.594</b> | 60.34  | 4   | 4 | F | 40 |
| 585 | 0.517 | 0.018 | <b>0.499</b> | 46.26  | 4   | 4 | F | 57 |
| 586 | 0.734 | 0.028 | <b>0.706</b> | 76.94  | 4   | 4 | M | 63 |
| 587 | 0.681 | 0.052 | <b>0.629</b> | 65.53  | 4   | 4 | F | 63 |
| 588 | 0.517 | 0.1   | <b>0.417</b> | 34.10  | 3   | 3 | M | 74 |
| 589 | 0.491 | 0.055 | <b>0.436</b> | 36.92  | 3   | 3 | F | 64 |
| 590 | 0.417 | 0.021 | <b>0.396</b> | 30.99  | 3   | 3 | M | 72 |
| 591 | 0.35  | 0.061 | <b>0.289</b> | 15.13  | 3   | 3 | F | 60 |
| 592 | 0.413 | 0.022 | <b>0.391</b> | 30.25  | 3   | 3 | F | 73 |
| 593 | 0.931 | 0.025 | <b>0.906</b> | 106.59 | 4   | 4 | F | 54 |
| 594 | 0.48  | 0.049 | <b>0.431</b> | 36.18  | 3   | 3 | F | 50 |
| 595 | 0.761 | 0.082 | <b>0.679</b> | 72.94  | 4   | 4 | F | 60 |
| 596 | 0.709 | 0.091 | <b>0.618</b> | 63.90  | 4   | 4 | M | 61 |
| 597 | 0.461 | 0.06  | <b>0.401</b> | 31.73  | 3   | 3 | F | 59 |
| 598 | 0.819 | 0.062 | <b>0.757</b> | 84.50  | 4   | 4 | F | 63 |
| 599 | 0.897 | 0.041 | <b>0.856</b> | 99.18  | 4   | 4 | M | 64 |
| 600 | 0.525 | 0.028 | <b>0.497</b> | 45.96  | 3\4 | 3 | F | 41 |
| 601 | 0.455 | 0.034 | <b>0.421</b> | 34.70  | 3   | 3 | F | 47 |
| 602 | 0.444 | 0.013 | <b>0.431</b> | 36.18  | 3   | 3 | M | 40 |
| 603 | 0.492 | 0.055 | <b>0.437</b> | 37.07  | 3   | 3 | F | 62 |
| 604 | 0.549 | 0.076 | <b>0.473</b> | 42.40  | 3   | 3 | F | 63 |
| 605 | 0.596 | 0.12  | <b>0.476</b> | 42.85  | 3   | 3 | M | 71 |
| 606 | 0.742 | 0.085 | <b>0.657</b> | 69.68  | 4   | 4 | M | 73 |
| 607 | 0.653 | 0.056 | <b>0.597</b> | 60.78  | 4   | 4 | F | 70 |
| 608 | 0.717 | 0.037 | <b>0.68</b>  | 73.09  | 4   | 4 | F | 52 |
| 609 | 0.523 | 0.021 | <b>0.502</b> | 46.70  | 4   | 4 | M | 65 |
| 610 | 0.405 | 0.011 | <b>0.394</b> | 30.69  | 3   | 3 | F | 58 |
| 611 | 0.58  | 0.072 | <b>0.508</b> | 47.59  | 3   | 3 | M | 54 |
| 612 | 0.598 | 0.099 | <b>0.499</b> | 46.26  | 3   | 3 | M | 70 |
| 613 | 0.602 | 0.05  | <b>0.552</b> | 54.11  | 4   | 4 | F | 54 |
| 614 | 0.7   | 0.061 | <b>0.639</b> | 67.01  | 4   | 4 | F | 70 |
| 615 | 0.85  | 0.039 | <b>0.811</b> | 92.51  | 4   | 4 | M | 64 |
| 616 | 0.761 | 0.05  | <b>0.711</b> | 77.68  | 4   | 4 | M | 55 |
| 617 | 0.279 | 0.016 | <b>0.263</b> | 11.27  | 3   | 3 | M | 67 |
| 618 | 0.573 | 0.039 | <b>0.534</b> | 51.45  | 3\4 | 3 | F | 49 |
| 619 | 0.564 | 0.074 | <b>0.49</b>  | 44.92  | 3   | 3 | F | 70 |
| 620 | 0.704 | 0.132 | <b>0.572</b> | 57.08  | 3   | 3 | M | 65 |
| 621 | 0.485 | 0.092 | <b>0.393</b> | 30.54  | 3   | 3 | M | 66 |
| 622 | 0.409 | 0.014 | <b>0.395</b> | 30.84  | 3   | 3 | M | 62 |
| 623 | 0.76  | 0.053 | <b>0.707</b> | 77.09  | 4   | 4 | F | 72 |



|                |              |              |              |        |           |           |   |         |
|----------------|--------------|--------------|--------------|--------|-----------|-----------|---|---------|
| 624            | 0.473        | 0.053        | <b>0.42</b>  | 34.55  | 3         | 3         | F | 60      |
| 625            | 0.502        | 0.06         | <b>0.442</b> | 37.81  | 3         | 3         | F | 62      |
| 626            | 0.199        | 0.01         | <b>0.189</b> | 0.31   | 1         | 1         | F | 72      |
| 627            | 0.804        | 0.07         | <b>0.734</b> | 81.09  | 4         | 4         | F | 52      |
| 628            | 0.94         | 0.106        | <b>0.834</b> | 95.91  | 4         | 4         | F | 69      |
| 629            | 0.854        | 0.069        | <b>0.785</b> | 88.65  | 4         | 4         | F | 63      |
| 630            | 0.826        | 0.072        | <b>0.754</b> | 84.06  | 4         | 4         | F | 74      |
| 631            | 0.467        | 0.048        | <b>0.419</b> | 34.40  | 2         | 2         | F | 30      |
| 632            | 0.934        | 0.053        | <b>0.881</b> | 102.88 | 4         | 4         | F | 56      |
| 633            | 0.913        | 0.041        | <b>0.872</b> | 101.55 | 4         | 4         | M | 42      |
| 634            | 0.821        | 0.05         | <b>0.771</b> | 86.58  | 4         | 4         | M | 70      |
| <b>Plate 9</b> |              |              |              |        |           |           |   |         |
| Blank          | <b>0</b>     | <b>0</b>     | <b>0</b>     |        | <b>No</b> | <b>No</b> |   |         |
| Sub Negative   | <b>0.073</b> | <b>0.065</b> | <b>0.008</b> |        | <b>No</b> | <b>No</b> |   |         |
| Inactivated    | <b>0.111</b> | <b>0.106</b> | <b>0.005</b> |        | <b>NO</b> | <b>No</b> |   |         |
| 100            | <b>1.249</b> | <b>0.252</b> | <b>0.997</b> |        | <b>5</b>  | <b>4</b>  |   |         |
| 60             | <b>0.822</b> | <b>0.032</b> | <b>0.79</b>  |        | <b>4</b>  | <b>4</b>  |   |         |
| 30             | <b>0.434</b> | <b>0.063</b> | <b>0.371</b> |        | <b>3</b>  | <b>3</b>  |   |         |
| 10             | <b>0.262</b> | <b>0.04</b>  | <b>0.222</b> |        | <b>2</b>  | <b>2</b>  |   |         |
| 635            | 0.5          | 0.056        | <b>0.444</b> | 33.91  | 3         | 3         | F | 53      |
| 636            | 0.775        | 0.07         | <b>0.705</b> | 61.72  | 4         | 4         | M | 57      |
| 637            | 0.429        | 0.012        | <b>0.417</b> | 31.03  | 2         | 2         | F | 71      |
| 638            | 0.698        | 0.041        | <b>0.657</b> | 56.61  | 4         | 4         | M | 56      |
| 639            | 0.414        | 0.048        | <b>0.366</b> | 25.59  | 2         | 2         | F | 53      |
| 640            | 0.619        | 0.049        | <b>0.57</b>  | 47.34  | 4         | 3         | M | 57      |
| 641            | 0.614        | 0.076        | <b>0.538</b> | 43.93  | 3         | 3         | F | 20      |
| 642            | 0.286        | 0.058        | <b>0.228</b> | 10.89  | 2         | 2         | F | 61      |
| 643            | 0.805        | 0.101        | <b>0.704</b> | 61.62  | 4         | 4         | F | 18      |
| 644            | 0.661        | 0.064        | <b>0.597</b> | 50.21  | 4         | 4         | M | 65      |
| 645            | 0.563        | 0.073        | <b>0.49</b>  | 38.81  | 3         | 3         | M | 70      |
| 646            | 0.463        | 0.041        | <b>0.422</b> | 31.56  | 3         | 3         | F | 31      |
| 647            | 1.073        | 0.061        | <b>1.012</b> | 94.44  | 4         | 4         | F | 51      |
| 648            | 0.41         | 0.04         | <b>0.37</b>  | 26.02  | 2         | 2         | M | 71      |
| 649            | 0.562        | 0.091        | <b>0.471</b> | 36.78  | 3         | 3         | M | 1 5/12  |
| 650            | 0.584        | 0.089        | <b>0.495</b> | 39.34  | 3         | 3         | M | 2 2 /12 |
| 651            | 0.826        | 0.088        | <b>0.738</b> | 65.24  | 4         | 4         | M | 57      |
| 652            | 1.043        | 0.093        | <b>0.95</b>  | 87.83  | 5         | 5         | F | 55      |
| 653            | 1.495        | 0.276        | <b>1.219</b> | 116.50 | 6         | 6         | F | 36      |
| 654            | 0.435        | 0.078        | <b>0.357</b> | 24.64  | 2         | 2         | M | 46      |
| 655            | 0.689        | 0.063        | <b>0.626</b> | 53.30  | 3         | 3         | M | 1 6/ 12 |
| 656            | 0.701        | 0.055        | <b>0.646</b> | 55.44  | 4         | 4         | M | 79      |
| 657            | 0.683        | 0.04         | <b>0.643</b> | 55.12  | 4         | 4         | F | 57      |
| 658            | 0.681        | 0.094        | <b>0.587</b> | 49.15  | 3         | 3         | F | 55      |

|     |       |       |              |        |   |   |   |    |
|-----|-------|-------|--------------|--------|---|---|---|----|
| 659 | 0.65  | 0.075 | <b>0.575</b> | 47.87  | 4 | 4 | F | 43 |
| 660 | 0.731 | 0.085 | <b>0.646</b> | 55.44  | 4 | 4 | F | 39 |
| 661 | 0.734 | 0.051 | <b>0.683</b> | 59.38  | 4 | 4 | M | 63 |
| 662 | 0.711 | 0.132 | <b>0.579</b> | 48.29  | 5 | 4 | M | 57 |
| 663 | 0.557 | 0.039 | <b>0.518</b> | 41.79  | 3 | 3 | F | 73 |
| 664 | 0.16  | 0.012 | <b>0.148</b> | 2.36   | 2 | 2 | F | 75 |
| 665 | 0.655 | 0.099 | <b>0.556</b> | 45.84  | 4 | 4 | F | 55 |
| 666 | 0.61  | 0.094 | <b>0.516</b> | 41.58  | 4 | 4 | F | 54 |
| 667 | 0.442 | 0.024 | <b>0.418</b> | 31.14  | 3 | 3 | F | 70 |
| 668 | 0.457 | 0.033 | <b>0.424</b> | 31.78  | 3 | 3 | F | 54 |
| 669 | 0.577 | 0.05  | <b>0.527</b> | 42.75  | 4 | 4 | F | 61 |
| 670 | 0.567 | 0.113 | <b>0.454</b> | 34.97  | 4 | 4 | M | 49 |
| 671 | 0.628 | 0.063 | <b>0.565</b> | 46.80  | 3 | 3 | F | 75 |
| 672 | 0.625 | 0.066 | <b>0.559</b> | 46.16  | 4 | 4 | M | 29 |
| 673 | 0.628 | 0.065 | <b>0.563</b> | 46.59  | 4 | 4 | M | 63 |
| 674 | 0.268 | 0.034 | <b>0.234</b> | 11.53  | 2 | 2 | F | 63 |
| 675 | 0.575 | 0.117 | <b>0.458</b> | 35.40  | 4 | 4 | M | 58 |
| 676 | 0.537 | 0.08  | <b>0.457</b> | 35.29  | 4 | 4 | F | 50 |
| 677 | 0.619 | 0.065 | <b>0.554</b> | 45.63  | 4 | 4 | F | 54 |
| 678 | 0.367 | 0.072 | <b>0.295</b> | 18.03  | 3 | 3 | F | 57 |
| 679 | 0.476 | 0.059 | <b>0.417</b> | 31.03  | 3 | 3 | F | 51 |
| 680 | 0.584 | 0.048 | <b>0.536</b> | 43.71  | 3 | 3 | M | 72 |
| 681 | 0.502 | 0.092 | <b>0.41</b>  | 30.28  | 3 | 3 | F | 40 |
| 682 | 0.42  | 0.011 | <b>0.409</b> | 30.18  | 3 | 2 | F | 64 |
| 683 | 0.651 | 0.077 | <b>0.574</b> | 47.76  | 4 | 4 | F | 53 |
| 684 | 0.724 | 0.105 | <b>0.619</b> | 52.56  | 4 | 4 | M | 66 |
| 685 | 0.517 | 0.101 | <b>0.416</b> | 30.92  | 3 | 3 | F | 60 |
| 686 | 0.36  | 0.081 | <b>0.279</b> | 16.32  | 2 | 2 | F | 55 |
| 687 | 0.581 | 0.079 | <b>0.502</b> | 40.09  | 3 | 3 | F | 41 |
| 688 | 0.489 | 0.054 | <b>0.435</b> | 32.95  | 3 | 3 | F | 70 |
| 689 | 0.448 | 0.031 | <b>0.417</b> | 31.03  | 3 | 3 | M | 65 |
| 690 | 0.873 | 0.145 | <b>0.728</b> | 64.17  | 5 | 5 | F | 66 |
| 691 | 0.685 | 0.101 | <b>0.584</b> | 48.83  | 5 | 5 | F | 55 |
| 692 | 0.69  | 0.196 | <b>0.494</b> | 39.24  | 5 | 5 | F | 48 |
| 693 | 1.315 | 0.143 | <b>1.172</b> | 111.49 | 6 | 6 | M | 6  |
| 694 | 0.876 | 0.112 | <b>0.764</b> | 68.01  | 6 | 6 | M | 54 |
| 695 | 0.453 | 0.027 | <b>0.426</b> | 31.99  | 3 | 3 | F | 32 |
| 696 | 0.633 | 0.103 | <b>0.53</b>  | 43.07  | 4 | 4 | F | 62 |
| 697 | 0.535 | 0.091 | <b>0.444</b> | 33.91  | 3 | 3 | F | 38 |
| 698 | 0.374 | 0.125 | <b>0.249</b> | 13.13  | 2 | 2 | F | 65 |
| 699 | 0.571 | 0.086 | <b>0.485</b> | 38.28  | 3 | 3 | M | 80 |
| 700 | 0.533 | 0.102 | <b>0.431</b> | 32.52  | 3 | 3 | F | 63 |
| 701 | 0.539 | 0.092 | <b>0.447</b> | 34.23  | 4 | 4 | F | 27 |

|                 |              |              |              |        |           |           |   |    |
|-----------------|--------------|--------------|--------------|--------|-----------|-----------|---|----|
| 702             | 0.367        | 0.075        | <b>0.292</b> | 17.71  | 3         | 3         | F | 59 |
| 703             | 0.439        | 0.023        | <b>0.416</b> | 30.92  | 3         | 3         | F | 36 |
| 704             | 0.492        | 0.068        | <b>0.424</b> | 31.78  | 4         | 4         | F | 13 |
| 705             | 0.913        | 0.103        | <b>0.81</b>  | 72.91  | 5         | 5         | F | 37 |
| 706             | 0.775        | 0.297        | <b>0.478</b> | 37.53  | 4         | 4         | F | 28 |
| 707             | 0.815        | 0.123        | <b>0.692</b> | 60.34  | 5         | 5         | F | 27 |
| 708             | 0.815        | 0.145        | <b>0.67</b>  | 57.99  | 5         | 5         | F | 45 |
| 709             | 0.503        | 0.083        | <b>0.42</b>  | 31.35  | 4         | 4         | F | 53 |
| 710             | 0.535        | 0.109        | <b>0.426</b> | 31.99  | 4         | 4         | F | 67 |
| 711             | 0.962        | 0.074        | <b>0.888</b> | 81.23  | 5         | 5         | F | 62 |
| 712             | 0.981        | 0.103        | <b>0.878</b> | 80.16  | 5         | 5         | M | 58 |
| 713             | 0.831        | 0.11         | <b>0.721</b> | 63.43  | 4         | 4         | F | 54 |
| 714             | 0.604        | 0.147        | <b>0.457</b> | 35.29  | 3         | 3         | F | 54 |
| 715             | 0.539        | 0.101        | <b>0.438</b> | 33.27  | 3         | 3         | F | 70 |
| 716             | 0.739        | 0.126        | <b>0.613</b> | 51.92  | 3         | 3         | M | 56 |
| 717             | 1.155        | 0.111        | <b>1.044</b> | 97.85  | 5         | 5         | F | 48 |
| 718             | 0.518        | 0.104        | <b>0.414</b> | 30.71  | 4         | 4         | M | 64 |
| 719             | 0.756        | 0.082        | <b>0.674</b> | 58.42  | 4         | 4         | F | 65 |
| 720             | 1.381        | 0.141        | <b>1.24</b>  | 118.74 | 5         | 5         | M | 40 |
| 721             | 0.845        | 0.154        | <b>0.691</b> | 60.23  | 4         | 4         | F | 43 |
| 722             | 0.639        | 0.154        | <b>0.485</b> | 38.28  | 3         | 3         | M | 61 |
| 723             | 0.756        | 0.128        | <b>0.628</b> | 53.52  | 3         | 3         | F | 56 |
| 724             | 0.522        | 0.148        | <b>0.374</b> | 26.45  | 2         | 2         | F | 54 |
| 725             | 0.71         | 0.12         | <b>0.59</b>  | 49.47  | 3         | 3         | F | 46 |
| 726             | 0.79         | 0.134        | <b>0.656</b> | 56.50  | 3         | 3         | M | 57 |
| 727             | 0.735        | 0.102        | <b>0.633</b> | 54.05  | 3         | 3         | M | 50 |
| 728             | 0.484        | 0.066        | <b>0.418</b> | 31.14  | 3         | 3         | M | 61 |
| <b>Plate 10</b> |              |              |              |        |           |           |   |    |
| Blank           | <b>0</b>     | <b>0</b>     | <b>0</b>     |        | <b>No</b> | <b>No</b> |   |    |
| Sub Negative    | <b>0.209</b> | <b>0.19</b>  | <b>0.019</b> |        | <b>No</b> | <b>No</b> |   |    |
| Inactivated     | <b>0.209</b> | <b>0.162</b> | <b>0.047</b> |        | <b>No</b> | <b>no</b> |   |    |
| 100             | <b>1.09</b>  | <b>0.091</b> | <b>0.999</b> |        | <b>5</b>  | <b>5</b>  |   |    |
| 60              | <b>0.716</b> | <b>0.139</b> | <b>0.577</b> |        | <b>4</b>  | <b>4</b>  |   |    |
| 30              | <b>0.566</b> | <b>0.087</b> | <b>0.479</b> |        | <b>3</b>  | <b>3</b>  |   |    |
| 10              | <b>0.472</b> | <b>0.073</b> | <b>0.399</b> |        | <b>2</b>  | <b>2</b>  |   |    |
| 729             | 0.966        | 0.076        | <b>0.89</b>  | 88.99  | 5         | 5         | M | 56 |
| 730             | 0.967        | 0.071        | <b>0.896</b> | 89.83  | 5         | 5         | F | 49 |
| 731             | 0.742        | 0.05         | <b>0.692</b> | 61.07  | 5         | 5         | F | 52 |
| 732             | 1.186        | 0.063        | <b>1.123</b> | 121.84 | 5         | 5         | M | 58 |
| 733             | 1.04         | 0.04         | <b>1</b>     | 104.50 | 5         | 5         | M | 39 |
| 734             | 0.756        | 0.052        | <b>0.704</b> | 62.76  | 5         | 5         | F | 82 |
| 735             | 1.064        | 0.064        | <b>1</b>     | 104.50 | 4         | 4         | F | 52 |
| 736             | 1.129        | 0.088        | <b>1.041</b> | 110.28 | 5         | 5         | F | 61 |

|     |       |       |              |        |   |   |   |    |
|-----|-------|-------|--------------|--------|---|---|---|----|
| 737 | 1.291 | 0.084 | <b>1.207</b> | 133.68 | 5 | 5 | F | 50 |
| 738 | 1.207 | 0.066 | <b>1.141</b> | 124.38 | 5 | 5 | M | 62 |
| 739 | 1.412 | 0.175 | <b>1.237</b> | 137.91 | 5 | 5 | M | 63 |
| 740 | 0.972 | 0.048 | <b>0.924</b> | 93.78  | 5 | 5 | F | 55 |
| 741 | 1.183 | 0.05  | <b>1.133</b> | 123.25 | 5 | 5 | F | 56 |
| 742 | 1.467 | 0.037 | <b>1.43</b>  | 165.13 | 5 | 5 | M | 67 |
| 743 | 0.863 | 0.057 | <b>0.806</b> | 77.14  | 4 | 4 | F | 67 |
| 744 | 1.621 | 0.359 | <b>1.262</b> | 141.44 | 5 | 5 | F | 59 |
| 745 | 1.048 | 0.056 | <b>0.992</b> | 103.37 | 5 | 5 | M | 65 |
| 746 | 0.888 | 0.043 | <b>0.845</b> | 82.64  | 5 | 5 | M | 44 |
| 747 | 1.217 | 0.206 | <b>1.011</b> | 106.05 | 5 | 5 | F | 57 |
| 748 | 0.661 | 0.046 | <b>0.615</b> | 50.21  | 4 | 4 | F | 65 |
| 749 | 0.818 | 0.031 | <b>0.787</b> | 74.46  | 4 | 4 | F | 50 |
| 750 | 1.465 | 0.214 | <b>1.251</b> | 139.89 | 5 | 5 | F | 57 |
| 751 | 0.744 | 0.018 | <b>0.726</b> | 65.86  | 4 | 4 | F | 63 |
| 752 | 0.663 | 0.074 | <b>0.589</b> | 46.55  | 4 | 4 | F | 76 |
| 753 | 1.695 | 0.171 | <b>1.524</b> | 178.38 | 6 | 6 | M | 65 |
| 754 | 0.496 | 0.012 | <b>0.484</b> | 31.74  | 4 | 4 | F | 68 |
| 755 | 0.986 | 0.042 | <b>0.944</b> | 96.60  | 5 | 5 | F | 67 |
| 756 | 0.901 | 0.046 | <b>0.855</b> | 84.05  | 5 | 5 | F | 54 |
| 757 | 0.957 | 0.039 | <b>0.918</b> | 92.93  | 5 | 5 | F | 60 |
| 758 | 0.978 | 0.03  | <b>0.948</b> | 97.16  | 5 | 5 | F | 33 |
| 759 | 0.539 | 0.058 | <b>0.481</b> | 31.32  | 4 | 4 | F | 65 |
| 760 | 0.613 | 0.091 | <b>0.522</b> | 37.10  | 4 | 4 | M | 61 |
| 761 | 1.011 | 0.057 | <b>0.954</b> | 98.01  | 5 | 5 | F | 59 |
| 762 | 0.908 | 0.084 | <b>0.824</b> | 79.68  | 4 | 5 | M | 70 |
| 763 | 0.729 | 0.102 | <b>0.627</b> | 51.90  | 4 | 4 | F | 38 |
| 764 | 1.626 | 0.12  | <b>1.506</b> | 175.84 | 6 | 6 | M | 62 |
| 765 | 1.561 | 0.102 | <b>1.459</b> | 169.22 | 6 | 6 | F | 53 |
| 766 | 1.314 | 0.051 | <b>1.263</b> | 141.58 | 6 | 6 | F | 24 |
| 767 | 0.68  | 0.058 | <b>0.622</b> | 51.20  | 4 | 4 | F | 62 |
| 768 | 1.581 | 0.243 | <b>1.338</b> | 152.15 | 6 | 6 | F | 59 |
| 769 | 1.572 | 0.3   | <b>1.272</b> | 142.85 | 6 | 6 | M | 55 |
| 770 | 1.134 | 0.095 | <b>1.039</b> | 110.00 | 5 | 5 | F | 54 |
| 771 | 1.055 | 0.053 | <b>1.002</b> | 104.78 | 5 | 5 | F | 65 |
| 772 | 1.62  | 0.212 | <b>1.408</b> | 162.02 | 6 | 6 | F | 19 |
| 773 | 0.69  | 0.047 | <b>0.643</b> | 54.16  | 5 | 5 | F | 62 |
| 774 | 1.843 | 0.459 | <b>1.384</b> | 158.64 | 6 | 6 | F | 51 |
| 775 | 1.431 | 0.011 | <b>1.42</b>  | 163.72 | 7 | 7 | F | 25 |
| 776 | 1.207 | 0.101 | <b>1.106</b> | 119.44 | 6 | 6 | F | 74 |
| 777 | 1.241 | 0.076 | <b>1.165</b> | 127.76 | 6 | 6 | M | 50 |
| 778 | 1.627 | 0.135 | <b>1.492</b> | 173.87 | 7 | 7 | F | 36 |
| 779 | 0.673 | 0.07  | <b>0.603</b> | 48.52  | 5 | 5 | F | 64 |

|                 |              |              |              |        |           |           |   |    |
|-----------------|--------------|--------------|--------------|--------|-----------|-----------|---|----|
| 780             | 1.159        | 0.067        | <b>1.092</b> | 117.47 | 5         | 5         | M | 66 |
| 781             | 1.65         | 0.358        | <b>1.292</b> | 145.67 | 6         | 6         | F | 74 |
| 782             | 1.839        | 0.368        | <b>1.471</b> | 170.91 | 6         | 6         | M | 46 |
| 783             | 1.522        | 0.139        | <b>1.383</b> | 158.50 | 6         | 6         | M | 48 |
| 784             | 0.563        | 0.081        | <b>0.482</b> | 31.46  | 4         | 4         | F | 60 |
| 785             | 1.246        | 0.092        | <b>1.154</b> | 126.21 | 6         | 6         | F | 43 |
| 786             | 1.367        | 0.124        | <b>1.243</b> | 138.76 | 6         | 6         | F | 50 |
| 787             | 2.1          | 0.746        | <b>1.354</b> | 154.41 | 6         | 6         | F | 40 |
| <b>Plate 11</b> |              |              |              |        |           |           |   |    |
| Blank           | <b>0.022</b> | <b>0.022</b> | <b>0</b>     |        | <b>No</b> | <b>No</b> |   |    |
| Sub Negative    | <b>0.076</b> | <b>0.045</b> | <b>0.031</b> |        | <b>No</b> | <b>No</b> |   |    |
| Inactivated     | <b>0.114</b> | <b>0.089</b> | <b>0.025</b> |        | <b>No</b> | <b>No</b> |   |    |
| 100             | <b>1.201</b> | <b>0.057</b> | <b>1.144</b> |        | <b>5</b>  | <b>6</b>  |   |    |
| 60              | <b>0.701</b> | <b>0.131</b> | <b>0.57</b>  |        | <b>4</b>  | <b>4</b>  |   |    |
| 30              | <b>0.436</b> | <b>0.024</b> | <b>0.412</b> |        | <b>3</b>  | <b>3</b>  |   |    |
| 10              | <b>0.189</b> | <b>0.015</b> | <b>0.174</b> |        | <b>2</b>  | <b>2</b>  |   |    |
| 788             | 0.512        | 0.105        | <b>0.407</b> | 34.32  | 3         | 3         | M | 65 |
| 789             | 0.305        | 0.127        | <b>0.178</b> | 12.95  | No        | 3         | M | 64 |
| 790             | 0.493        | 0.019        | <b>0.474</b> | 40.57  | 3         | 3         | F | 54 |
| 791             | 0.479        | 0.014        | <b>0.465</b> | 39.74  | 3         | 4         | F | 64 |
| 792             | 0.398        | 0.028        | <b>0.37</b>  | 30.87  | 3         | 4         | M | 71 |
| 793             | 0.586        | 0.042        | <b>0.544</b> | 47.11  | 4         | 4         | M | 54 |
| 794             | 0.581        | 0.023        | <b>0.558</b> | 48.41  | 4         | 3         | F | 62 |
| 795             | 0.737        | 0.026        | <b>0.711</b> | 62.69  | 4         | 3         | F | 47 |
| 796             | 0.456        | 0.017        | <b>0.439</b> | 37.31  | 3         | 3         | F | 66 |
| 797             | 0.642        | 0.03         | <b>0.612</b> | 53.45  | 4         | 3         | F | 43 |
| 798             | 0.884        | 0.33         | <b>0.554</b> | 48.04  | 3         | 3         | F | 63 |
| 799             | 0.719        | 0.15         | <b>0.569</b> | 49.44  | 3         | 4         | M | 58 |
| 800             | 0.578        | 0.15         | <b>0.428</b> | 36.28  | 3         | 5         | M | 67 |
| 801             | 0.869        | 0.032        | <b>0.837</b> | 74.45  | 4         | 4         | M | 42 |
| 802             | 0.31         | 0.002        | <b>0.308</b> | 25.08  | 3         | 3         | M | 59 |
| 803             | 0.516        | 0.041        | <b>0.475</b> | 40.67  | 3         | 3         | M | 75 |
| 804             | 0.492        | 0.021        | <b>0.471</b> | 40.29  | 3         | 2         | M | 48 |
| 805             | 0.529        | 0.054        | <b>0.475</b> | 40.67  | 3         | 4         | M | 53 |
| 806             | 0.283        | 0.054        | <b>0.229</b> | 17.71  | 2         | 2         | M | 70 |
| 807             | 0.768        | 0.059        | <b>0.709</b> | 62.50  | 4         | 4         | M | 47 |
| 808             | 0.217        | 0.025        | <b>0.192</b> | 14.26  | 2         | 2         | F | 62 |
| 809             | 0.527        | 0.052        | <b>0.475</b> | 40.67  | 4         | 3         | F | 55 |
| 810             | 0.825        | 0.036        | <b>0.789</b> | 69.97  | 5         | 5         | M | 61 |
| 811             | 0.401        | 0.031        | <b>0.37</b>  | 30.87  | 3         | 3         | M | 58 |
| 812             | 0.418        | 0.043        | <b>0.375</b> | 31.34  | 3         | 4         | F | 67 |
| 813             | 0.382        | 0.015        | <b>0.367</b> | 30.59  | 3         | 3         | M | 71 |
| 814             | 0.666        | 0.064        | <b>0.602</b> | 52.52  | 4         | 4         | F | 62 |

|     |       |       |              |       |   |   |   |    |
|-----|-------|-------|--------------|-------|---|---|---|----|
| 815 | 0.28  | 0.05  | <b>0.23</b>  | 17.81 | 2 | 2 | F | 61 |
| 816 | 0.401 | 0.027 | <b>0.374</b> | 31.24 | 3 | 3 | F | 31 |
| 817 | 0.544 | 0.059 | <b>0.485</b> | 41.60 | 3 | 3 | F | 67 |
| 818 | 0.486 | 0.032 | <b>0.454</b> | 38.71 | 3 | 4 | F | 57 |
| 819 | 0.412 | 0.046 | <b>0.366</b> | 30.50 | 3 | 3 | M | 30 |
| 820 | 0.381 | 0.009 | <b>0.372</b> | 31.06 | 3 | 3 | F | 37 |
| 821 | 0.57  | 0.022 | <b>0.548</b> | 47.48 | 3 | 3 | F | 57 |
| 822 | 0.902 | 0.063 | <b>0.839</b> | 74.64 | 4 | 4 | F | 65 |
| 823 | 0.651 | 0.022 | <b>0.629</b> | 55.04 | 4 | 4 | M | 54 |
| 824 | 0.633 | 0.028 | <b>0.605</b> | 52.80 | 4 | 4 | M | 33 |
| 825 | 0.727 | 0.115 | <b>0.612</b> | 53.45 | 4 | 4 | F | 67 |
| 826 | 0.271 | 0.042 | <b>0.229</b> | 17.71 | 3 | 3 | M | 73 |
| 827 | 0.409 | 0.037 | <b>0.372</b> | 31.06 | 3 | 3 | M | 74 |
| 828 | 0.412 | 0.011 | <b>0.401</b> | 33.76 | 3 | 4 | F | 65 |
| 829 | 0.157 | 0.034 | <b>0.123</b> | 7.82  | 2 | 2 | M | 67 |
| 830 | 0.518 | 0.008 | <b>0.51</b>  | 43.93 | 4 | 4 | M | 78 |
| 831 | 0.471 | 0.016 | <b>0.455</b> | 38.80 | 3 | 3 | M | 52 |
| 832 | 0.907 | 0.048 | <b>0.859</b> | 76.50 | 4 | 4 | F | 70 |
| 833 | 0.808 | 0.167 | <b>0.641</b> | 56.16 | 4 | 4 | F | 75 |
| 834 | 0.35  | 0.034 | <b>0.316</b> | 25.83 | 2 | 2 | F | 43 |
| 835 | 0.728 | 0.04  | <b>0.688</b> | 60.54 | 5 | 4 | M | 81 |
| 836 | 0.531 | 0.109 | <b>0.422</b> | 35.72 | 4 | 3 | F | 54 |
| 837 | 0.595 | 0.042 | <b>0.553</b> | 47.95 | 4 | 3 | F | 10 |
| 838 | 1.143 | 0.505 | <b>0.638</b> | 55.88 | 4 | 3 | F | 58 |
| 839 | 0.38  | 0.01  | <b>0.37</b>  | 30.87 | 4 | 3 | M | 61 |
| 840 | 0.494 | 0.048 | <b>0.446</b> | 37.96 | 3 | 3 | F | 55 |
| 841 | 0.602 | 0.084 | <b>0.518</b> | 44.68 | 4 | 4 | F | 65 |
| 842 | 0.683 | 0.187 | <b>0.496</b> | 42.63 | 3 | 3 | F | 52 |
| 843 | 0.486 | 0.066 | <b>0.42</b>  | 35.54 | 3 | 3 | F | 55 |
| 844 | 0.57  | 0.038 | <b>0.532</b> | 45.99 | 3 | 2 | F | 14 |
| 845 | 0.451 | 0.058 | <b>0.393</b> | 33.02 | 3 | 4 | F | 53 |
| 846 | 0.591 | 0.023 | <b>0.568</b> | 49.35 | 4 | 3 | F | 20 |
| 847 | 0.504 | 0.034 | <b>0.47</b>  | 40.20 | 3 | 3 | F | 38 |
| 848 | 0.546 | 0.101 | <b>0.445</b> | 37.87 | 3 | 3 | M | 64 |
| 849 | 0.692 | 0.078 | <b>0.614</b> | 53.64 | 3 | 3 | F | 46 |
| 850 | 0.53  | 0.052 | <b>0.478</b> | 40.95 | 3 | 3 | M | 54 |
| 851 | 0.543 | 0.112 | <b>0.431</b> | 36.56 | 3 | 3 | F | 50 |
| 852 | 0.595 | 0.045 | <b>0.55</b>  | 47.67 | 3 | 4 | F | 42 |
| 853 | 0.518 | 0.044 | <b>0.474</b> | 40.57 | 3 | 3 | F | 41 |
| 854 | 0.522 | 0.023 | <b>0.499</b> | 42.91 | 3 | 3 | F | 58 |
| 855 | 0.526 | 0.051 | <b>0.475</b> | 40.67 | 3 | 3 | M | 90 |
| 856 | 0.561 | 0.069 | <b>0.492</b> | 42.25 | 3 | 3 | M | 75 |
| 857 | 0.484 | 0.098 | <b>0.386</b> | 32.36 | 3 | 3 | M | 64 |

|                 |              |              |              |        |           |           |   |      |
|-----------------|--------------|--------------|--------------|--------|-----------|-----------|---|------|
| 858             | 0.44         | 0.059        | <b>0.381</b> | 31.90  | 3         | 3         | F | 49   |
| 859             | 0.508        | 0.086        | <b>0.422</b> | 35.72  | 3         | 3         | F | 62   |
| 860             | 0.929        | 0.144        | <b>0.785</b> | 69.60  | 4         | 4         | F | 19   |
| 861             | 0.485        | 0.051        | <b>0.434</b> | 36.84  | 3         | 3         | M | 53   |
| 862             | 0.477        | 0.043        | <b>0.434</b> | 36.84  | 3         | 3         | F | 53   |
| 863             | 1.04         | 0.089        | <b>0.951</b> | 85.09  | 5         | 5         | F | 3y9m |
| 864             | 0.876        | 0.11         | <b>0.766</b> | 67.82  | 4         | 4         | F | 3y7m |
| 865             | 0.579        | 0.175        | <b>0.404</b> | 34.04  | 3         | 3         | F | 72   |
| 866             | 0.793        | 0.068        | <b>0.725</b> | 64.00  | 4         | 4         | F | 14   |
| 867             | 0.931        | 0.104        | <b>0.827</b> | 73.52  | 4         | 4         | M | 50   |
| 868             | 1.376        | 0.181        | <b>1.195</b> | 107.86 | 5         | 5         | F | 72   |
| 869             | 1.333        | 0.102        | <b>1.231</b> | 111.22 | 5         | 5         | F | 65   |
| 870             | 0.693        | 0.042        | <b>0.651</b> | 57.09  | 4         | 4         | M | 13   |
| 871             | 1.324        | 0.047        | <b>1.277</b> | 115.51 | 5         | 5         | F | 14   |
| <b>Plate 12</b> |              |              |              |        |           |           |   |      |
| Blank           | <b>0</b>     | <b>0</b>     | <b>0</b>     |        | <b>No</b> | <b>No</b> |   |      |
| Sub Negative    | <b>0.085</b> | <b>0.067</b> | <b>0.018</b> |        | <b>No</b> | <b>No</b> |   |      |
| Inactivated     | <b>0.036</b> | <b>0.005</b> | <b>0.031</b> |        | <b>No</b> | <b>No</b> |   |      |
| 100             | <b>1.4</b>   | <b>0.29</b>  | <b>1.11</b>  |        | <b>6</b>  | <b>7</b>  |   |      |
| 60              | <b>0.569</b> | <b>0.082</b> | <b>0.487</b> |        | <b>3</b>  | <b>3</b>  |   |      |
| 30              | <b>0.363</b> | <b>0.04</b>  | <b>0.323</b> |        | <b>2</b>  | <b>2</b>  |   |      |
| 10              | <b>0.337</b> | <b>0.208</b> | <b>0.129</b> |        | <b>1</b>  | <b>1</b>  |   |      |
| 872             | 1.191        | 0.023        | <b>1.168</b> | 109.13 | 6         | 6         | F | 40   |
| 873             | 1.182        | 0.019        | <b>1.163</b> | 108.68 | 6         | 6         | F | 57   |
| 874             | 0.83         | 0.037        | <b>0.793</b> | 75.32  | 5         | 5         | F | 67   |
| 875             | 0.934        | 0.021        | <b>0.913</b> | 86.14  | 6         | 6         | M | 52   |
| 876             | 0.853        | 0.295        | <b>0.558</b> | 54.13  | 3         | 3         | M | 64   |
| 877             | 1.118        | 0.029        | <b>1.089</b> | 102.01 | 5         | 5         | F | 65   |
| 878             | 1.468        | 0.05         | <b>1.418</b> | 131.67 | 7         | 7         | F | 44   |
| 879             | 0.795        | 0.13         | <b>0.665</b> | 63.77  | 4         | 4         | M | 84   |
| 880             | 0.6          | 0.028        | <b>0.572</b> | 55.39  | 5         | 5         | F | 36   |
| 881             | 0.997        | 0.103        | <b>0.894</b> | 84.42  | 5         | 5         | F | 64   |
| 882             | 1.239        | 0.202        | <b>1.037</b> | 97.32  | 6         | 6         | M | 49   |
| 883             | 1.239        | 0.125        | <b>1.114</b> | 104.26 | 7         | 7         | F | 65   |
| 884             | 0.533        | 0.042        | <b>0.491</b> | 48.08  | 3         | 3         | M | 53   |
| 885             | 1.116        | 0.115        | <b>1.001</b> | 94.07  | 5         | 5         | F | 37   |
| 886             | 1.207        | 0.061        | <b>1.146</b> | 107.15 | 6         | 6         | F | 65   |
| 887             | 1.171        | 0.288        | <b>0.883</b> | 83.43  | 5         | 5         | F | 64   |
| 888             | 1.315        | 0.015        | <b>1.3</b>   | 121.03 | 6         | 6         | F | 57   |
| 889             | 1.065        | 0.011        | <b>1.054</b> | 98.85  | 5         | 5         | F | 26   |
| 890             | 0.929        | 0.015        | <b>0.914</b> | 86.23  | 4         | 4         | M | 36   |
| 891             | 0.525        | 0.011        | <b>0.514</b> | 50.16  | 3         | 3         | F | 48   |
| 892             | 0.779        | 0.047        | <b>0.732</b> | 69.82  | 3         | 4         | F | 64   |

|                 |              |              |              |        |           |           |   |    |
|-----------------|--------------|--------------|--------------|--------|-----------|-----------|---|----|
| 893             | 1.123        | 0.253        | <b>0.87</b>  | 82.26  | 6         | 6         | F | 64 |
| 894             | 1.547        | 0.115        | <b>1.432</b> | 132.93 | 7         | 7         | F | 52 |
| 895             | 0.698        | 0.032        | <b>0.666</b> | 63.86  | 5         | 5         | F | 68 |
| 896             | 0.406        | 0.048        | <b>0.358</b> | 36.09  | 6         | 6         | M | 49 |
| 897             | 0.987        | 0.039        | <b>0.948</b> | 89.29  | 5         | 5         | F | 58 |
| 898             | 0.363        | 0.079        | <b>0.284</b> | 29.42  | 2         | 2         | M | 47 |
| 899             | 1.257        | 0.154        | <b>1.103</b> | 103.27 | 7         | 7         | F | 65 |
| 900             | 0.631        | 0.074        | <b>0.557</b> | 54.04  | 3         | 3         | F | 57 |
| 901             | 1.463        | 0.097        | <b>1.366</b> | 126.98 | 7         | 7         | F | 65 |
| 902             | 1.585        | 0.22         | <b>1.365</b> | 126.89 | 7         | 7         | M | 64 |
| 903             | 1.278        | 0.187        | <b>1.091</b> | 102.19 | 6         | 6         | F | 73 |
| 904             | 0.873        | 0.013        | <b>0.86</b>  | 81.36  | 6         | 6         | M | 55 |
| 905             | 0.833        | 0.013        | <b>0.82</b>  | 77.75  | 5         | 5         | M | 82 |
| 906             | 0.856        | 0.01         | <b>0.846</b> | 80.09  | 4         | 4         | M | 63 |
| 907             | 1.516        | 0.055        | <b>1.461</b> | 135.55 | 7         | 7         | F | 27 |
| 908             | 0.585        | 0.075        | <b>0.51</b>  | 49.80  | 3         | 3         | M | 78 |
| 909             | 0.429        | 0.051        | <b>0.378</b> | 37.89  | 2         | 2         | F | 70 |
| 910             | 0.427        | 0.035        | <b>0.392</b> | 39.16  | 3         | 3         | M | 66 |
| 911             | 0.621        | 0.187        | <b>0.434</b> | 42.94  | 3         | 3         | F | 65 |
| 912             | 0.712        | 0.024        | <b>0.688</b> | 65.85  | 4         | 4         | M | 61 |
| 913             | 0.677        | 0.022        | <b>0.655</b> | 62.87  | 4         | 4         | F | 62 |
| 914             | 0.49         | 0.035        | <b>0.455</b> | 44.84  | 3         | 3         | F | 63 |
| 915             | 0.32         | 0.042        | <b>0.278</b> | 28.88  | 2         | 2         | F | 55 |
| 916             | 0.326        | 0.039        | <b>0.287</b> | 29.69  | 2         | 2         | F | 67 |
| 917             | 0.269        | 0.061        | <b>0.208</b> | 22.57  | 3         | 3         | F | 62 |
| 918             | 1.584        | 0.068        | <b>1.516</b> | 140.51 | 7         | 7         | M | 53 |
| 919             | 0.554        | 0.063        | <b>0.491</b> | 48.08  | 4         | 4         | M | 55 |
| 920             | 0.589        | 0.025        | <b>0.564</b> | 54.67  | 4         | 4         | M | 66 |
| 921             | 1.482        | 0.145        | <b>1.337</b> | 124.37 | 7         | 7         | F | 55 |
| 922             | 0.632        | 0.025        | <b>0.607</b> | 58.54  | 5         | 5         | M | 56 |
| 923             | 1.599        | 0.084        | <b>1.515</b> | 140.42 | 7         | 7         | M | 68 |
| 924             | 1.008        | 0.213        | <b>0.795</b> | 75.50  | 4         | 4         | F | 62 |
| 925             | 0.727        | 0.093        | <b>0.634</b> | 60.98  | 4         | 4         | F | 50 |
| 926             | 0.345        | 0.066        | <b>0.279</b> | 28.97  | 3         | 3         | F | 52 |
| 927             | 0.445        | 0.106        | <b>0.339</b> | 34.38  | 3         | 3         | M | 70 |
| 928             | 0.536        | 0.063        | <b>0.473</b> | 46.46  | 4         | 4         | M | 69 |
| <b>Plate 13</b> |              |              |              |        |           |           |   |    |
| Blank           | <b>0.01</b>  | <b>0</b>     | <b>0.01</b>  |        | <b>No</b> | <b>No</b> |   |    |
| Sub Negative    | <b>0.181</b> | <b>0.061</b> | <b>0.12</b>  |        | <b>No</b> | <b>No</b> |   |    |
| Inactivated     | <b>0.235</b> | <b>0.222</b> | <b>0.013</b> |        | <b>No</b> | <b>No</b> |   |    |
| 100             | <b>1.308</b> | <b>0.338</b> | <b>0.97</b>  |        | <b>5</b>  | <b>5</b>  |   |    |
| 60              | <b>0.742</b> | <b>0.083</b> | <b>0.659</b> |        | <b>3</b>  | <b>3</b>  |   |    |
| 30              | <b>0.304</b> | <b>0.025</b> | <b>0.279</b> |        | <b>2</b>  | <b>2</b>  |   |    |



|     |              |              |              |        |          |          |   |    |
|-----|--------------|--------------|--------------|--------|----------|----------|---|----|
| 10  | <b>0.275</b> | <b>0.019</b> | <b>0.256</b> |        | <b>2</b> | <b>2</b> |   |    |
| 929 | 1.232        | 0.023        | <b>1.209</b> | 125.42 | 5        | 5        | F | 66 |
| 930 | 1.036        | 0.025        | <b>1.011</b> | 103.06 | 5        | 5        | F | 15 |
| 931 | 1.032        | 0.041        | <b>0.991</b> | 100.80 | 5        | 5        | M | 53 |
| 932 | 1.646        | 0.052        | <b>1.594</b> | 168.88 | 6        | 6        | M | 21 |
| 933 | 1.317        | 0.066        | <b>1.251</b> | 130.16 | 5        | 5        | F | 66 |
| 934 | 0.891        | 0.072        | <b>0.819</b> | 81.39  | 4        | 4        | F | 70 |
| 935 | 1.071        | 0.057        | <b>1.014</b> | 103.40 | 5        | 5        | F | 59 |
| 936 | 0.912        | 0.041        | <b>0.871</b> | 87.26  | 5        | 5        | M | 55 |
| 937 | 1.476        | 0.034        | <b>1.442</b> | 151.72 | 5        | 5        | F | 42 |
| 938 | 1.111        | 0.036        | <b>1.075</b> | 110.29 | 5        | 5        | F | 60 |
| 939 | 1.599        | 0.132        | <b>1.467</b> | 154.54 | 5        | 5        | M | 45 |
| 940 | 0.494        | 0.058        | <b>0.436</b> | 38.15  | 3        | 3        | F | 74 |
| 941 | 0.894        | 0.035        | <b>0.859</b> | 85.90  | 5        | 5        | F | 42 |
| 942 | 0.771        | 0.098        | <b>0.673</b> | 64.90  | 4        | 4        | F | 71 |
| 943 | 0.767        | 0.04         | <b>0.727</b> | 71.00  | 4        | 4        | F | 45 |
| 944 | 1.241        | 0.01         | <b>1.231</b> | 127.90 | 5        | 5        | F | 37 |
| 945 | 0.654        | 0.042        | <b>0.612</b> | 58.02  | 4        | 5        | F | 33 |
| 946 | 0.946        | 0.023        | <b>0.923</b> | 93.13  | 5        | 4        | F | 57 |
| 947 | 0.922        | 0.038        | <b>0.884</b> | 88.72  | 5        | 4        | M | 36 |
| 948 | 1.386        | 0.065        | <b>1.321</b> | 138.06 | 5        | 4        | F | 56 |
| 949 | 0.396        | 0.014        | <b>0.382</b> | 32.05  | 3        | 3        | F | 67 |
| 950 | 0.696        | 0.07         | <b>0.626</b> | 59.60  | 4        | 4        | F | 42 |
| 951 | 1.037        | 0.045        | <b>0.992</b> | 100.92 | 5        | 5        | M | 75 |
| 952 | 0.874        | 0.055        | <b>0.819</b> | 81.39  | 4        | 4        | M | 65 |
| 953 | 1.031        | 0.193        | <b>0.838</b> | 83.53  | 5        | 5        | F | 52 |
| 954 | 1.204        | 0.018        | <b>1.186</b> | 122.82 | 5        | 5        | M | 68 |
| 955 | 0.738        | 0.052        | <b>0.686</b> | 66.37  | 4        | 4        | F | 55 |
| 956 | 0.853        | 0.032        | <b>0.821</b> | 81.61  | 5        | 5        | F | 58 |
| 957 | 1.155        | 0.01         | <b>1.145</b> | 118.19 | 5        | 5        | F | 61 |
| 958 | 0.905        | 0.086        | <b>0.819</b> | 81.39  | 5        | 5        | F | 49 |
| 959 | 1.156        | 0.047        | <b>1.109</b> | 114.13 | 5        | 5        | F | 73 |
| 960 | 0.906        | 0.164        | <b>0.742</b> | 72.69  | 5        | 5        | F | 80 |
| 961 | 0.987        | 0.036        | <b>0.951</b> | 96.29  | 5        | 4        | F | 54 |
| 962 | 1.004        | 0.138        | <b>0.866</b> | 86.69  | 5        | 5        | M | 68 |
| 963 | 0.467        | 0.011        | <b>0.456</b> | 40.40  | 3        | 3        | F | 34 |
| 964 | 0.931        | 0.07         | <b>0.861</b> | 86.13  | 5        | 5        | F | 50 |
| 965 | 1.03         | 0.027        | <b>1.003</b> | 102.16 | 5        | 5        | F | 62 |
| 966 | 0.738        | 0.081        | <b>0.657</b> | 63.10  | 4        | 5        | F | 25 |
| 967 | 0.677        | 0.046        | <b>0.631</b> | 60.16  | 4        | 4        | M | 72 |
| 968 | 0.923        | 0.064        | <b>0.859</b> | 85.90  | 5        | 4        | M | 55 |
| 969 | 0.535        | 0.023        | <b>0.512</b> | 46.73  | 4        | 5        | F | 70 |
| 970 | 0.612        | 0.02         | <b>0.592</b> | 55.76  | 4        | 4        | M | 70 |

|                 |       |       |              |        |   |   |   |    |
|-----------------|-------|-------|--------------|--------|---|---|---|----|
| 971             | 0.899 | 0.039 | <b>0.86</b>  | 86.01  | 5 | 4 | M | 59 |
| 972             | 0.771 | 0.016 | <b>0.755</b> | 74.16  | 4 | 4 | M | 55 |
| 973             | 0.744 | 0.055 | <b>0.689</b> | 66.71  | 4 | 4 | F | 50 |
| 974             | 0.8   | 0.048 | <b>0.752</b> | 73.82  | 4 | 4 | F | 64 |
| 975             | 0.979 | 0.055 | <b>0.924</b> | 93.24  | 5 | 5 | F | 56 |
| 976             | 0.849 | 0.039 | <b>0.81</b>  | 80.37  | 4 | 4 | F | 63 |
| 977             | 0.842 | 0.029 | <b>0.813</b> | 80.71  | 4 | 4 | M | 55 |
| 978             | 1.419 | 0.103 | <b>1.316</b> | 137.50 | 5 | 4 | M | 58 |
| 979             | 0.709 | 0.038 | <b>0.671</b> | 64.68  | 4 | 4 | F | 42 |
| 980             | 0.581 | 0.026 | <b>0.555</b> | 51.58  | 4 | 4 | F | 67 |
| 981             | 0.443 | 0.053 | <b>0.39</b>  | 32.95  | 3 | 3 | F | 79 |
| 982             | 0.997 | 0.148 | <b>0.849</b> | 84.77  | 5 | 5 | M | 60 |
| 983             | 0.967 | 0.046 | <b>0.921</b> | 92.90  | 5 | 4 | M | 54 |
| 984             | 0.696 | 0.053 | <b>0.643</b> | 61.52  | 4 | 4 | F | 52 |
| 985             | 1.128 | 0.035 | <b>1.093</b> | 112.32 | 5 | 5 | F | 32 |
| 986             | 1.14  | 0.043 | <b>1.097</b> | 112.77 | 5 | 5 | M | 65 |
| 987             | 1.145 | 0.088 | <b>1.057</b> | 108.26 | 5 | 4 | F | 45 |
| 988             | 1.466 | 0.045 | <b>1.421</b> | 149.35 | 5 | 4 | F | 58 |
| 989             | 0.689 | 0.043 | <b>0.646</b> | 61.85  | 4 | 4 | F | 36 |
| 990             | 1.27  | 0.117 | <b>1.153</b> | 119.09 | 5 | 5 | F | 55 |
| 991             | 0.396 | 0.015 | <b>0.381</b> | 31.94  | 3 | 2 | F | 45 |
| 992             | 0.693 | 0.077 | <b>0.616</b> | 58.47  | 4 | 4 | F | 74 |
| 993             | 0.405 | 0.033 | <b>0.372</b> | 30.92  | 3 | 3 | F | 67 |
| 994             | 0.723 | 0.036 | <b>0.687</b> | 66.48  | 4 | 4 | F | 50 |
| 995             | 0.82  | 0.019 | <b>0.801</b> | 79.35  | 4 | 4 | F | 54 |
| 996             | 0.654 | 0.034 | <b>0.62</b>  | 58.92  | 4 | 3 | M | 65 |
| 997             | 1.085 | 0.084 | <b>1.001</b> | 101.93 | 5 | 5 | M | 59 |
| 998             | 0.926 | 0.121 | <b>0.805</b> | 79.81  | 5 | 5 | F | 49 |
| 999             | 0.437 | 0.05  | <b>0.387</b> | 32.61  | 3 | 2 | F | 60 |
| 1000            | 0.768 | 0.08  | <b>0.688</b> | 66.60  | 4 | 5 | F | 57 |
| 1001            | 1.016 | 0.055 | <b>0.961</b> | 97.42  | 5 | 4 | F | 33 |
| 1002            | 1.33  | 0.214 | <b>1.116</b> | 114.92 | 5 | 5 | F | 57 |
| 1003            | 0.996 | 0.076 | <b>0.92</b>  | 92.79  | 5 | 4 | M | 66 |
| 1004            | 0.433 | 0.058 | <b>0.375</b> | 31.26  | 3 | 3 | F | 65 |
| 1005            | 0.628 | 0.089 | <b>0.539</b> | 49.77  | 4 | 4 | M | 56 |
| 1006            | 0.855 | 0.085 | <b>0.77</b>  | 75.85  | 4 | 5 | M | 42 |
| 1007            | 0.835 | 0.085 | <b>0.75</b>  | 73.60  | 4 | 3 | M | 61 |
| 1008            | 0.954 | 0.087 | <b>0.867</b> | 86.80  | 5 | 4 | M | 45 |
| 1009            | 0.564 | 0.033 | <b>0.531</b> | 48.87  | 4 | 4 | M | 71 |
| 1010            | 0.659 | 0.076 | <b>0.583</b> | 54.74  | 4 | 5 | M | 62 |
| 1011            | 0.727 | 0.083 | <b>0.644</b> | 61.63  | 4 | 4 | F | 72 |
| 1012            | 0.98  | 0.131 | <b>0.849</b> | 84.77  | 5 | 4 | M | 55 |
| <b>Plate 14</b> |       |       |              |        |   |   |   |    |

|              |              |              |              |        |           |           |   |    |
|--------------|--------------|--------------|--------------|--------|-----------|-----------|---|----|
| Blank        | <b>0</b>     | <b>0</b>     | <b>0</b>     |        | <b>No</b> | <b>No</b> |   |    |
| Sub Negative | <b>0.163</b> | <b>0.108</b> | <b>0.055</b> |        | <b>No</b> | <b>No</b> |   |    |
| Inactivated  | <b>0.103</b> | <b>0.041</b> | <b>0.062</b> |        | <b>No</b> | <b>No</b> |   |    |
| 100          | <b>1.236</b> | <b>0.313</b> | <b>0.923</b> |        | <b>5</b>  | <b>5</b>  |   |    |
| 60           | <b>0.7</b>   | <b>0.061</b> | <b>0.639</b> |        | <b>4</b>  | <b>4</b>  |   |    |
| 30           | <b>0.556</b> | <b>0.081</b> | <b>0.475</b> |        | <b>4</b>  | <b>4</b>  |   |    |
| 10           | <b>0.227</b> | <b>0.054</b> | <b>0.173</b> |        | <b>No</b> | <b>No</b> |   |    |
| 1013         | 0.947        | 0.105        | <b>0.842</b> | 85.47  | 5         | 5         | F | 72 |
| 1014         | 0.99         | 0.023        | <b>0.967</b> | 100.79 | 5         | 4         | F | 45 |
| 1015         | 0.593        | 0.024        | <b>0.569</b> | 52.02  | 3         | 3         | F | 68 |
| 1016         | 0.714        | 0.028        | <b>0.686</b> | 66.36  | 4         | 4         | M | 67 |
| 1017         | 1.131        | 0.054        | <b>1.077</b> | 114.27 | 5         | 5         | F | 67 |
| 1018         | 0.643        | 0.038        | <b>0.605</b> | 56.43  | 4         | 4         | F | 54 |
| 1019         | 0.835        | 0.029        | <b>0.806</b> | 81.06  | 4         | 4         | F | 63 |
| 1020         | 0.913        | 0.02         | <b>0.893</b> | 91.72  | 5         | 5         | F | 80 |
| 1021         | 1.103        | 0.017        | <b>1.086</b> | 115.37 | 5         | 5         | F | 63 |
| 1022         | 0.884        | 0.023        | <b>0.861</b> | 87.80  | 4         | 4         | F | 56 |
| 1023         | 0.691        | 0.015        | <b>0.676</b> | 65.13  | 4         | 4         | F | 50 |
| 1024         | 0.901        | 0.014        | <b>0.887</b> | 90.99  | 5         | 5         | F | 65 |
| 1025         | 0.994        | 0.027        | <b>0.967</b> | 100.79 | 5         | 5         | M | 43 |
| 1026         | 0.871        | 0.029        | <b>0.842</b> | 85.47  | 4         | 4         | F | 70 |
| 1027         | 0.343        | 0.045        | <b>0.298</b> | 18.82  | 3         | 3         | M | 31 |
| 1028         | 1.123        | 0.01         | <b>1.113</b> | 118.68 | 5         | 5         | M | 78 |
| 1029         | 1.398        | 0.033        | <b>1.365</b> | 149.56 | 5         | 5         | M | 43 |
| 1030         | 0.9          | 0.035        | <b>0.865</b> | 88.29  | 5         | 4         | M | 59 |
| 1031         | 0.845        | 0.015        | <b>0.83</b>  | 84.00  | 4         | 4         | M | 40 |
| 1032         | 0.763        | 0.021        | <b>0.742</b> | 73.22  | 4         | 4         | F | 47 |
| 1033         | 0.596        | 0.018        | <b>0.578</b> | 53.12  | 4         | 4         | F | 38 |
| 1034         | 0.709        | 0.058        | <b>0.651</b> | 62.07  | 4         | 4         | F | 40 |
| 1035         | 0.615        | 0.014        | <b>0.601</b> | 55.94  | 4         | 4         | M | 61 |
| 1036         | 0.885        | 0.035        | <b>0.85</b>  | 86.45  | 4         | 4         | F | 57 |
| 1037         | 1.019        | 0.016        | <b>1.003</b> | 105.20 | 5         | 5         | F | 30 |
| 1038         | 1.185        | 0.025        | <b>1.16</b>  | 124.44 | 5         | 4         | M | 52 |
| 1039         | 0.649        | 0.017        | <b>0.632</b> | 59.74  | 4         | 4         | F | 58 |
| 1040         | 1.317        | 0.03         | <b>1.287</b> | 140.00 | 5         | 5         | F | 59 |
| 1041         | 0.256        | 0.019        | <b>0.237</b> | 11.34  | 2         | 2         | M | 68 |
